# Supplementary material for: Bimolecular oxidative C–H alkynylation of α-substituted isochromans
Source: Royal Society of Chemistry journal article supplement (doi:10.1039/c9qo00352e), 2019-01-01

## Supporting Information

|                                                           |           |
|-----------------------------------------------------------|-----------|
| <b>Contents</b> .....                                     | <b>1</b>  |
| <b>General information</b> .....                          | <b>2</b>  |
| <b>General procedure</b> .....                            | <b>2</b>  |
| <b>Analytical data</b> .....                              | <b>4</b>  |
| <b>Reference</b> .....                                    | <b>20</b> |
| <b><sup>1</sup>H and <sup>13</sup>C NMR spectra</b> ..... | <b>21</b> |

## General information

Proton ( $^1\text{H}$  NMR) and carbon ( $^{13}\text{C}$  NMR) nuclear magnetic resonance spectra were recorded at 400 or 500 MHz and 101 or 126 MHz, respectively. The chemical shifts are given in parts per million (ppm) on the delta ( $\delta$ ) scale. The solvent peak was used as a reference value, for  $^1\text{H}$  NMR:  $\text{CDCl}_3 = 7.27$  ppm; for  $^{13}\text{C}$  NMR:  $\text{CDCl}_3 = 77.23$  ppm. Analytical TLC was performed on precoated silica gel GF254 plates. Column chromatography was carried out on silica gel (200–300 mesh). HRMS were carried out on an Orbitrap analyzer.

## General procedure

### Procedure A for the synthesis of 1-phenylisochroman (1a)

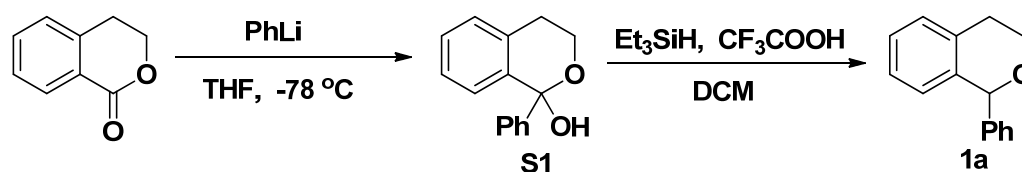

A solution of isochroman-1-one (0.74 g, 5.0 mmol, 1.0 equiv) and THF (10 mL) was cooled to  $-78$  °C. PhLi (2.5 M in n-hexane 2.4 mL, 6.0 mmol, 1.2 equiv) was added dropwise. After being stirred for 1 h. Cold water (10 mL) was added, and the aqueous phase was extracted with ethyl acetate ( $3 \times 10$  mL). The combined organic layers were washed with sat. brine (10 mL), dried ( $\text{MgSO}_4$ ), filtered and concentrated. The resulting pale yellow oil was purified by silica gel chromatography (hexane-EtOAc, 4:1) to give hemiketal S1 as an oil, which was directly used in the next step.

To a hemiketal S1 in anhyd.  $\text{CH}_2\text{Cl}_2$  (10 mL) at  $0$  °C was added TFA (0.37 mL, 5 mmol) dropwise and the mixture was stirred for 15 min.  $\text{Et}_3\text{SiH}$  (0.75 mL, 5 mmol) was added dropwise to the reaction mixture at  $0$  °C and the mixture was stirred for 2 h then warmed to r.t. The reaction mixture was quenched with ice water (10 mL) and extracted with  $\text{CH}_2\text{Cl}_2$  ( $3 \times 10$  mL). The combined organic extracts were washed with

sat. brine (10 mL) and dried (anhyd MgSO<sub>4</sub>). After concentration, the residue was purified by flash chromatography (hexane-EtOAc, 9:1) to give compound **1a**.

#### Procedure B for the synthesis of 6-methoxy-1-phenylisochroman (**1b**)

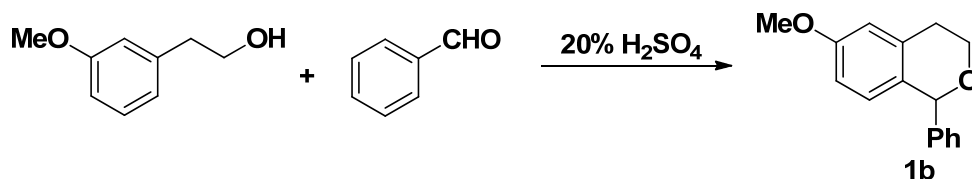

General Procedure to get **6-methoxy-1-phenylisochroman (1b)** from 2-(3-methoxyphenyl)ethanol (2 mmol 1.0 eq) and H<sub>2</sub>SO<sub>4</sub> (0.2 eq) were added successively to a solution of aldehyde (1.2 eq) in toluene (5 mL). The reaction mixture stirred for 2 h. The reaction mixture was quenched with water (2 mL) and extracted with EtOAc (3×10 mL). The combined organic extracts were washed with sat. brine (10 mL) and dried (anhyd. MgSO<sub>4</sub>). After concentration, the residue was purified by flash chromatography (hexane-EtOAc, 9:1) to give compound **1b**.

#### Procedure C for the synthesis of 1-phenyl-1-(phenylethynyl)isochroman (**3a**)

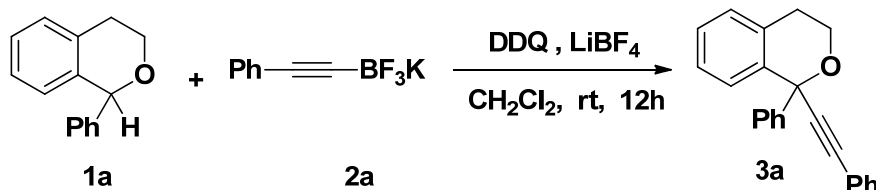

#### General Procedure to get **1-phenyl-1-(phenylethynyl)isochroman (3a)**

To a solution of **1a** (0.10 mmol, 1.0 eq) in CH<sub>2</sub>Cl<sub>2</sub> (1 mL) was added **2a** (0.15 mmol, 1.5 eq), DDQ (0.12 mmol, 1.2 eq) and LiBF<sub>4</sub> (0.10 mmol, 1.0 eq) at room temperature for 12h. The reaction was quenched by saturated aqueous NaHCO<sub>3</sub>, extracted with DCM (3×5 mL), and the combined organic layer was dried over MgSO<sub>4</sub>, filtered and evaporated under vacuum. The residue was purified by flash column chromatography to give the desired product **3a**.

## Analytical data for products

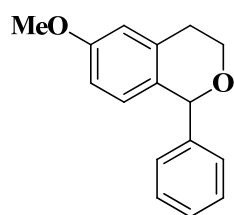

### 6-Methoxy-1-phenylisochroman (1b)

It was prepared following the general procedure B and purified by flashchromatography on silica gel by using hexane-EtOAc (9:1) as eluent to afford **1b** (393 mg, 82%).  $^1\text{H}$  NMR (500 MHz,  $\text{CDCl}_3$ )  $\delta$  7.40–7.28 (m, 5H), 6.71 (d,  $J = 1.0$  Hz, 1H), 6.68–6.63 (m, 2H), 5.69 (s, 1H), 4.21–4.15 (m, 1H), 3.97–3.91 (m, 1H), 3.79 (s, 3H), 3.24–3.06 (m, 1H), 2.83–2.74 (m, 1H).  $^{13}\text{C}$  NMR (126 MHz,  $\text{CDCl}_3$ )  $\delta$  158.3, 142.6, 135.3, 129.9, 129.0, 128.6, 128.3, 128.2, 113.4, 112.5, 79.6, 64.0, 55.4, 29.4. HRMS (EI)  $m/z$   $[\text{M} + \text{H}]^+$  calculated for  $\text{C}_{16}\text{H}_{17}\text{O}_2$ : 241.1223, found: 241.1226.

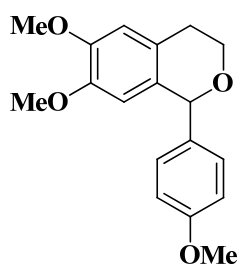

### 6,7-Dimethoxy-1-(4-methoxyphenyl)isochroman (1c)

It was prepared following the general procedure B and purified by flashchromatography on silica gel by using hexane-EtOAc (4:1) as eluent to afford **1c** (482 mg, 80%).  $^1\text{H}$  NMR (400 MHz,  $\text{CDCl}_3$ )  $\delta$  7.25–7.19 (m, 2H), 6.90–6.84 (m, 2H), 6.65 (s, 1H), 6.24 (s, 1H), 5.64 (s, 1H), 4.15–4.08 (m, 1H), 3.91–3.83 (m, 4H), 3.80 (s, 3H), 3.66 (s, 3H), 3.10–2.95 (m, 1H), 2.76–2.68 (m, 1H).  $^{13}\text{C}$  NMR (101 MHz,  $\text{CDCl}_3$ )  $\delta$  159.6, 147.9, 147.4, 134.7, 130.3, 129.4, 126.3, 113.9, 111.3, 109.9, 78.8, 63.6, 56.1, 56.1, 55.5, 28.6. HRMS (EI)  $m/z$   $[\text{M} + \text{H}]^+$  calculated for  $\text{C}_{18}\text{H}_{21}\text{O}_4$ : 301.1434 found: 301.1431.

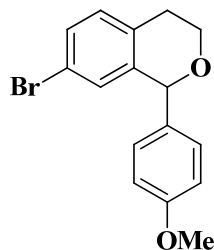

### 7-Bromo-1-(4-methoxyphenyl)isochroman (1d)

It was prepared following the general procedure A and purified by flashchromatography on silica gel by using hexane-EtOAc (9:1) as eluent to afford **1d** (630 mg, 41%).  $^1\text{H}$  NMR (500 MHz,  $\text{CDCl}_3$ )  $\delta$  7.29 (dd,  $J = 8.2, 1.7$  Hz, 1H), 7.21 (d,  $J = 8.6$  Hz, 2H), 7.04 (d,  $J = 8.2$  Hz, 1H), 6.95–6.84 (m, 3H), 5.63 (s, 1H), 4.21–4.12 (m, 1H), 3.95–3.85 (m, 1H), 3.82 (s, 3H), 3.18–2.94 (m, 1H), 2.81–2.69 (m, 1H).  $^{13}\text{C}$  NMR (126 MHz,  $\text{CDCl}_3$ )  $\delta$  159.8, 140.1, 133.8, 133.1, 130.6, 130.3, 129.9, 129.9, 119.7, 114.2, 78.9, 63.8, 55.5, 28.5. HRMS (EI)  $m/z$   $[\text{M} + \text{H}]^+$  calculated for  $\text{C}_{16}\text{H}_{16}\text{BrO}_2$ : 319.0328, found: 319.0331.

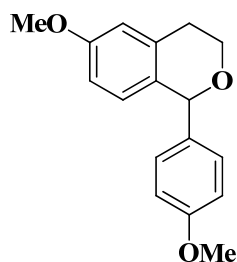

### 6-Methoxy-1-(4-methoxyphenyl)isochroman (1e)

It was prepared following the general procedure B and purified by flashchromatography on silica gel by using hexane-EtOAc (9:1) as eluent to afford **1e** (405 mg, 75%).  $^1\text{H}$  NMR (500 MHz,  $\text{CDCl}_3$ )  $\delta$  7.24–7.19 (m, 2H), 6.90–6.83 (m, 2H), 6.72–6.60 (m, 3H), 5.65 (s, 1H), 4.19–4.11 (m, 1H), 3.95–3.85 (m, 1H), 3.80 (s, 3H), 3.79 (s, 3H), 3.14–3.07 (m, 1H), 2.81–2.72 (m, 1H).  $^{13}\text{C}$  NMR (126 MHz,  $\text{CDCl}_3$ )  $\delta$  159.6, 158.3, 135.4, 134.9, 130.3, 130.2, 128.3, 113.9, 113.3, 112.5, 79.1, 63.9, 55.5, 55.4, 29.4. HRMS (EI)  $m/z$   $[\text{M} + \text{H}]^+$  calculated for  $\text{C}_{17}\text{H}_{19}\text{O}_3$ : 271.1329, found: 271.1331.

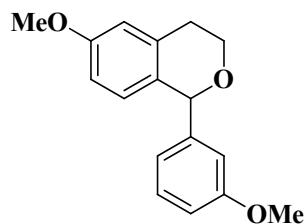

### 6-Methoxy-1-(3-methoxyphenyl)isochroman (**1f**)

It was prepared following the general procedure B and purified by flashchromatography on silica gel by using hexane-EtOAc (9:1) as eluent to afford **1f** (412 mg, 76%).  $^1\text{H}$  NMR (400 MHz,  $\text{CDCl}_3$ )  $\delta$  7.33–7.23 (m, 1H), 6.92 (d,  $J = 7.7$  Hz, 1H), 6.90–6.83 (m, 2H), 6.68–6.68 (m, 3H), 5.68 (s, 1H), 4.22–4.13 (m, 1H), 3.98–3.87 (m, 1H), 3.80 (s, 3H), 3.79 (s, 3H), 3.19–3.07 (m, 1H), 2.84–2.76 (m, 1H).  $^{13}\text{C}$  NMR (101 MHz,  $\text{CDCl}_3$ )  $\delta$  159.8, 158.3, 144.1, 135.2, 129.7, 129.5, 128.2, 121.4, 114.4, 113.8, 113.3, 112.5, 79.5, 63.9, 55.4, 29.3. HRMS (EI)  $m/z$   $[\text{M} + \text{H}]^+$  calculated for  $\text{C}_{17}\text{H}_{19}\text{O}_3$ : 271.1329, found: 271.1325.

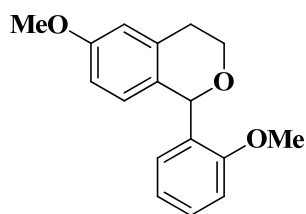

### 6-Methoxy-1-(2-methoxyphenyl)isochroman (**1g**)

It was prepared following the general procedure B and purified by flashchromatography on silica gel by using hexane-EtOAc (9:1) as eluent to afford **1g** (424 mg, 78%).  $^1\text{H}$  NMR (400 MHz,  $\text{CDCl}_3$ )  $\delta$  7.33–7.23 (m, 1H), 7.08 (dd,  $J = 7.6, 1.6$  Hz, 1H), 6.95 (d,  $J = 8.2$  Hz, 1H), 6.89 (t,  $J = 7.5$  Hz, 1H), 6.73–6.60 (m, 3H), 6.23 (s, 1H), 4.19–4.12 (m, 1H), 3.99–3.86 (m, 4H), 3.79 (s, 3H), 3.17–3.05 (m, 1H), 2.83–2.76 (m, 1H).  $^{13}\text{C}$  NMR (101 MHz,  $\text{CDCl}_3$ )  $\delta$  158.1, 157.6, 135.6, 131.1, 130.2, 129.9, 129.2, 127.9, 120.8, 113.2, 112.5, 110.9, 72.3, 63.7, 55.9, 55.4, 29.4. HRMS (EI)  $m/z$   $[\text{M} + \text{H}]^+$  calculated for  $\text{C}_{17}\text{H}_{19}\text{O}_3$ : 271.1329, found: 271.1326.

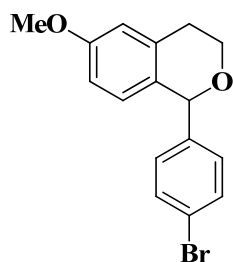

### 1-(4-Bromophenyl)-6-methoxyisochroman (**1h**)

It was prepared following the general procedure B and purified by flashchromatography on silica gel by using hexane-EtOAc (9:1) as eluent to afford **1h** (522 mg, 80%). <sup>1</sup>H NMR (500 MHz, CDCl<sub>3</sub>) δ 7.47 (d, *J* = 8.4 Hz, 2H), 7.19 (d, *J* = 8.4 Hz, 2H), 6.69 (d, *J* = 2.1 Hz, 1H), 6.68–6.62 (m, 2H), 5.64 (s, 1H), 4.19–4.10 (m, 1H), 3.93–3.83 (m, 1H), 3.79 (s, 3H), 3.19–2.99 (m, 1H), 2.85–2.75 (m, 1H). <sup>13</sup>C NMR (126 MHz, CDCl<sub>3</sub>) δ 158.5, 141.7, 135.3, 131.7, 130.7, 129.2, 128.1, 122.3, 113.5, 112.6, 78.9, 63.9, 55.4, 29.3. HRMS (EI) *m/z* [M + H]<sup>+</sup> calculated for C<sub>16</sub>H<sub>16</sub>BrO<sub>2</sub>: 319.0328, found: 319.0331.

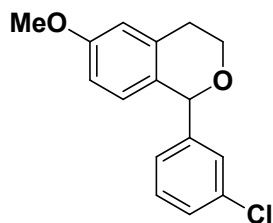

### 1-(3-Chlorophenyl)-6-methoxyisochroman (**1i**)

It was prepared following the general procedure B and purified by flashchromatography on silica gel by using hexane-EtOAc (9:1) as eluent to afford **1i** (427 mg, 78%). <sup>1</sup>H NMR (500 MHz, CDCl<sub>3</sub>) δ 7.31–7.24 (m, 3H), 7.23–7.18 (m, 1H), 6.72–6.62 (m, 3H), 5.65 (s, 1H), 4.18–4.10 (m, 1H), 3.95–3.85 (m, 1H), 3.79 (s, 3H), 3.21–3.03 (m, 1H), 2.85–2.68 (m, 1H). <sup>13</sup>C NMR (126 MHz, CDCl<sub>3</sub>) δ 158.5, 144.7, 135.3, 134.5, 129.8, 129.1, 129.0, 128.4, 128.1, 127.2, 113.5, 112.7, 78.9, 64.0, 55.4, 29.2. HRMS (EI) *m/z* [M + H]<sup>+</sup> calculated for C<sub>16</sub>H<sub>16</sub>ClO<sub>2</sub>: 275.0833, found: 275.0836.

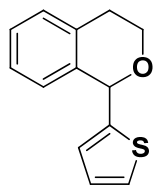

### 1-(Thiophen-2-yl)isochroman (1j)

It was prepared following the general procedure A and purified by flashchromatography on silica gel by using hexane-EtOAc (9:1) as eluent to afford **1j** (411 mg, 39%).  $^1\text{H}$  NMR (400 MHz,  $\text{CDCl}_3$ )  $\delta$  7.33–7.29 (m, 1H), 7.24–7.01 (m, 3H), 6.99–6.96 (m, 3H), 6.06 (s, 1H), 4.19–4.10 (m, 1H), 3.98–3.89 (m, 1H), 3.01–2.86 (m, 2H).  $^{13}\text{C}$  NMR (101 MHz,  $\text{CDCl}_3$ )  $\delta$  146.2, 136.5, 133.7, 129.0, 127.4, 127.2, 127.1, 126.5, 126.4, 126.1, 74.1, 62.6, 28.7. HRMS (EI)  $m/z$   $[\text{M} + \text{H}]^+$  calculated for  $\text{C}_{13}\text{H}_{13}\text{OS}$ : 217.0682, found: 217.0684.

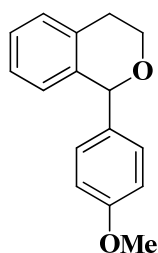

### 1-(4-Methoxyphenyl)isochroman (1k)

It was prepared following the general procedure A and purified by flashchromatography on silica gel by using hexane-EtOAc (9:1) as eluent to afford **1k** (732 mg, 62%).  $^1\text{H}$  NMR (500 MHz,  $\text{CDCl}_3$ )  $\delta$  7.24–7.20 (m, 2H), 7.20–7.13 (m, 2H), 7.11–7.04 (m, 1H), 6.91–6.84 (m, 2H), 6.76 (d,  $J = 7.7$  Hz, 1H), 5.69 (s, 1H), 4.19–4.12 (m, 1H), 3.94–3.91 (m, 1H), 3.80 (s, 3H), 3.20–3.04 (m, 1H), 2.84–2.76 (m, 1H).  $^{13}\text{C}$  NMR (126 MHz,  $\text{CDCl}_3$ )  $\delta$  159.6, 137.9, 134.8, 134.1, 130.3, 128.9, 127.2, 126.75, 126.1, 113.9, 79.3, 63.9, 55.5, 29.1. HRMS (EI)  $m/z$   $[\text{M} + \text{H}]^+$  calculated for  $\text{C}_{16}\text{H}_{17}\text{O}_2$ : 241.1223, found: 241.1220.



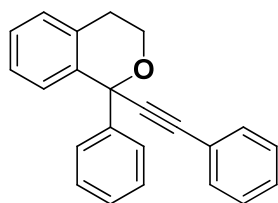

### 1-Phenyl-1-(phenylethynyl)isochroman (3a)

Colorless oil. Yield: 28.9 mg (93%).  $^1\text{H}$  NMR (400 MHz,  $\text{CDCl}_3$ )  $\delta$  7.68 (dd,  $J = 8.1$ , 1.4 Hz, 2H), 7.55–7.46 (m, 2H), 7.41–7.29 (m, 6H), 7.24–7.16 (m, 2H), 7.16–7.09 (m, 1H), 7.04 (d,  $J = 7.9$  Hz, 1H), 4.48–4.41 (m, 1H), 4.22–4.15 (m, 1H), 3.27–3.20 (m, 1H), 2.87–2.81 (m, 1H).  $^{13}\text{C}$  NMR (101 MHz,  $\text{CDCl}_3$ )  $\delta$  143.9, 139.3, 133.1, 132.0, 128.9, 128.7, 128.5, 128.4, 128.4, 128.3, 128.0, 127.2, 126.5, 122.9, 90.5, 88.8, 77.9, 62.1, 28.8. HRMS (EI)  $m/z$   $[\text{M} + \text{H}]^+$  calculated for  $\text{C}_{23}\text{H}_{19}\text{O}$ : 311.1430, found: 311.1433.

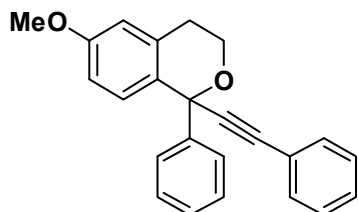

### 6-Methoxy-1-phenyl-1-(phenylethynyl)isochroman (3b)

Colorless oil. Yield: 31.9 mg (94%).  $^1\text{H}$  NMR (400 MHz,  $\text{CDCl}_3$ )  $\delta$  7.71–7.60 (m, 2H), 7.55–7.46 (m, 2H), 7.39–7.28 (m, 6H), 6.98–6.88 (m, 1H), 6.75–6.60 (m, 2H), 4.44–4.36 (m, 1H), 4.18–4.11 (m, 1H), 3.79 (s, 3H), 3.22–3.15 (m, 1H), 2.81–2.76 (m, 1H).  $^{13}\text{C}$  NMR (101 MHz,  $\text{CDCl}_3$ )  $\delta$  158.5, 144.1, 134.5, 132.0, 131.6, 129.7, 128.7, 128.4, 128.4, 127.9, 122.9, 113.2, 113.1, 90.7, 88.5, 77.7, 61.9, 55.4, 29.1. HRMS (EI)  $m/z$   $[\text{M} + \text{H}]^+$  calculated for  $\text{C}_{24}\text{H}_{21}\text{O}_2$ : 341.1536, found: 341.1533.

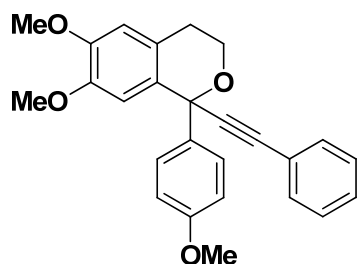

**6,7-Dimethoxy-1-(4-methoxyphenyl)-1-(phenylethynyl)isochroman (3c)**

Colorless oil. Yield: 36.5 mg (91%).  $^1\text{H}$  NMR (500 MHz,  $\text{CDCl}_3$ )  $\delta$  7.57–7.52 (m, 2H), 7.52–7.47 (m, 2H), 7.35–7.29 (m, 3H), 6.90–6.83 (m, 2H), 6.63 (s, 1H), 6.50 (s, 1H), 4.41–4.22 (m, 1H), 4.17–4.00 (m, 1H), 3.89 (s, 3H), 3.81 (s, 3H), 3.70 (s, 3H), 3.15–3.02 (m, 1H), 2.80–2.67 (m, 1H).  $^{13}\text{C}$  NMR (126 MHz,  $\text{CDCl}_3$ )  $\delta$  159.7, 148.5, 147.8, 136.3, 132.0, 131.0, 129.4, 128.7, 128.5, 125.7, 123.0, 113.7, 111.1, 111.0, 100.2, 90.9, 88.1, 61.9, 56.2, 56.1, 55.5, 28.4. HRMS (EI)  $m/z$   $[\text{M} + \text{H}]^+$  calculated for  $\text{C}_{26}\text{H}_{25}\text{O}_4$ : 401.1747, found: 401.1744.

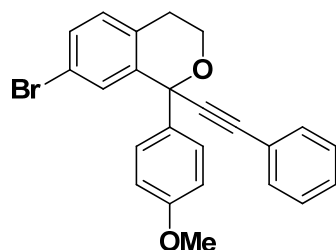

**7-Bromo-1-(4-methoxyphenyl)-1-(phenylethynyl)isochroman (3d)**

Colorless oil. Yield: 38.1 mg (91%).  $^1\text{H}$  NMR (500 MHz,  $\text{CDCl}_3$ )  $\delta$  7.57–7.52 (m, 2H), 7.52–7.48 (m, 2H), 7.37–7.29 (m, 4H), 7.15 (d,  $J = 2.0$  Hz, 1H), 7.04 (d,  $J = 8.2$  Hz, 1H), 6.95–6.84 (m, 2H), 4.47–4.31 (m, 1H), 4.20–4.04 (m, 1H), 3.82 (s, 3H), 3.21–3.06 (m, 1H), 2.85–2.71 (m, 1H).  $^{13}\text{C}$  NMR (126 MHz,  $\text{CDCl}_3$ )  $\delta$  159.9, 141.7, 135.5, 132.2, 132.0, 131.2, 130.7, 130.4, 129.3, 128.9, 128.5, 122.6, 119.9, 113.8, 89.9, 89.2, 77.4, 61.8, 55.5, 28.3. HRMS (EI)  $m/z$   $[\text{M} + \text{H}]^+$  calculated for  $\text{C}_{24}\text{H}_{20}\text{BrO}_2$ : 419.0641, found: 419.0644.

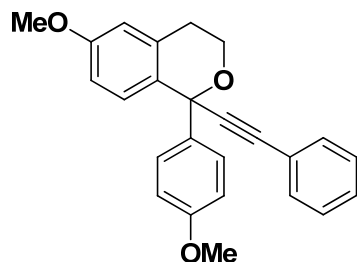

**6-Methoxy-1-(4-methoxyphenyl)-1-(phenylethynyl)isochroman (3e)**

Colorless oil. Yield: 33.5 mg (90%).  $^1\text{H}$  NMR (400 MHz,  $\text{CDCl}_3$ )  $\delta$  7.57–7.53 (m, 2H), 7.50–7.46 (m, 2H), 7.32–7.29 (m, 3H), 6.94 (d,  $J = 8.4$  Hz, 1H), 6.91–6.82 (m, 2H), 6.74–6.62 (m, 2H), 4.41–4.32 (m, 1H), 4.21–4.10 (m, 1H), 3.81 (s, 3H), 3.80 (s, 3H), 3.23–3.11 (m, 1H), 2.83–2.75 (m, 1H).  $^{13}\text{C}$  NMR (126 MHz,  $\text{CDCl}_3$ )  $\delta$  159.6, 158.5, 136.5, 134.6, 131.9, 131.8, 129.7, 129.3, 128.6, 128.4, 123.0, 113.6, 113.2, 113.1, 90.9, 88.3, 77.3, 61.9, 55.5, 55.4, 29.2. HRMS (EI)  $m/z$   $[\text{M} + \text{H}]^+$  calculated for  $\text{C}_{25}\text{H}_{23}\text{O}_3$ : 371.1642, found: 371.1644.

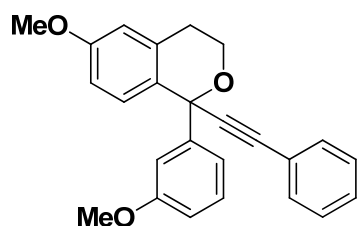

**6-Methoxy-1-(3-methoxyphenyl)-1-(phenylethynyl)isochroman (3f)**

Colorless oil. Yield: 32.7 mg (88%).  $^1\text{H}$  NMR (400 MHz,  $\text{CDCl}_3$ )  $\delta$  7.55–7.46 (m, 2H), 7.37–7.19 (m, 6H), 6.99 (d,  $J = 8.5$  Hz, 1H), 6.87–6.85 (m, , 1H), 6.77–6.65 (m, 2H), 4.46–4.33 (m, 1H), 4.22–4.11 (m, 1H), 3.82 (s, 3H), 3.81 (s, 3H), 3.24–3.14 (m, 5.8 Hz, 1H), 2.85–2.74 (m, 1H).  $^{13}\text{C}$  NMR (101 MHz,  $\text{CDCl}_3$ )  $\delta$  159.6, 158.6, 145.7, 134.4, 132.0, 131.4, 129.6, 129.3, 128.7, 128.4, 122.9, 120.5, 114.0, 113.6, 113.2, 113.1, 90.7, 88.4, 77.6, 61.9, 55.5, 55.4, 29.1. HRMS (EI)  $m/z$   $[\text{M} + \text{H}]^+$  calculated for  $\text{C}_{25}\text{H}_{23}\text{O}_3$ : 371.1642, found: 371.1645.

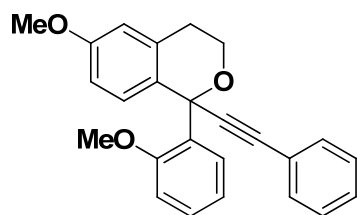

**6-Methoxy-1-(2-methoxyphenyl)-1-(phenylethynyl)isochroman (3g)**

Colorless oil. Yield: 26.2 mg (70%).  $^1\text{H}$  NMR (500 MHz,  $\text{CDCl}_3$ )  $\delta$  8.04 (dd,  $J = 7.7$ , 1.7 Hz, 1H), 7.55–7.45 (m, 2H), 7.36–7.28 (m, 4H), 7.06–6.95 (m, 1H), 6.91–6.79 (m, 2H), 6.70–6.57 (m, 2H), 4.47–4.29 (m, 1H), 4.27–4.13 (m, 1H), 3.79 (s, 3H), 3.47 (s, 3H), 3.32–3.15 (m, 1H), 2.81–2.60 (m, 1H).  $^{13}\text{C}$  NMR (126 MHz,  $\text{CDCl}_3$ )  $\delta$  158.1, 157.9, 134.9, 132.3, 131.9, 131.9, 130.2, 130.0, 128.5, 128.4, 127.7, 123.2, 120.3, 113.9, 112.7, 112.5, 90.7, 89.2, 77.3, 62.3, 56.3, 55.4, 29.0. HRMS (EI)  $m/z$   $[\text{M} + \text{H}]^+$  calculated for  $\text{C}_{25}\text{H}_{23}\text{O}_3$ : 371.1642, found: 371.1640.

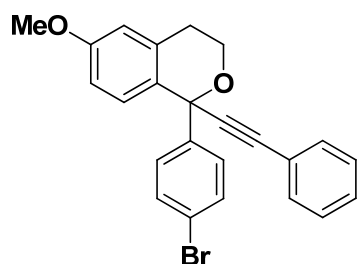

**1-(4-Bromophenyl)-6-methoxy-1-(phenylethynyl)isochroman (3h)**

Colorless oil. Yield: 36.6 mg (86%).  $^1\text{H}$  NMR (400 MHz,  $\text{CDCl}_3$ )  $\delta$  7.57–7.52 (m, 2H), 7.49–7.45 (m, 4H), 7.34–7.30 (m, 3H), 6.91–6.88 (m, 1H), 6.75–6.63 (m, 2H), 4.46–4.33 (m, 1H), 4.21–4.10 (m, 1H), 3.80 (s, 3H), 3.23–3.15 (m, 1H), 2.83–2.74 (m, 1H).  $^{13}\text{C}$  NMR (101 MHz,  $\text{CDCl}_3$ )  $\delta$  158.7, 143.3, 134.4, 131.9, 131.4, 131.1, 129.8, 129.5, 128.8, 128.5, 122.7, 122.5, 113.3, 113.2, 90.0, 88.8, 77.3, 61.9, 55.4, 29.0. HRMS (EI)  $m/z$   $[\text{M} + \text{H}]^+$  calculated for  $\text{C}_{24}\text{H}_{20}\text{BrO}_2$ : 419.0641, found: 419.0644.

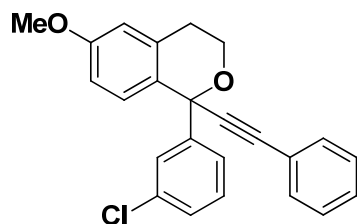

**1-(3-Chlorophenyl)-6-methoxy-1-(phenylethynyl)isochroman (3i)**

Colorless oil. Yield: 31.4 mg (82%)  $^1\text{H}$  NMR (500 MHz,  $\text{CDCl}_3$ )  $\delta$  7.57 – 7.53 (m, 1H), 7.51–7.45 (m, 1H), 7.43–7.36 (m, 2H), 7.27–7.17 (m, 5H), 6.83 (d,  $J = 8.5$  Hz, 1H), 6.68–6.55 (m, 2H), 4.38–4.24 (m, 1H), 4.14–3.99 (m, 1H), 3.70 (s, 3H), 3.26–3.02 (m, 1H), 2.82–2.60 (m, 1H).  $^{13}\text{C}$  NMR (126 MHz,  $\text{CDCl}_3$ )  $\delta$  158.7, 146.2, 134.4, 134.3, 132.0, 130.9, 129.6, 129.5, 128.8, 128.5, 128.5, 128.2, 126.2, 122.6, 113.4, 113.2, 89.9, 88.9, 77.3, 62.0, 55.4, 29.0. HRMS (EI)  $m/z$   $[\text{M} + \text{H}]^+$  calculated for  $\text{C}_{24}\text{H}_{20}\text{ClO}_2$ : 375.1146, found: 375.1149.

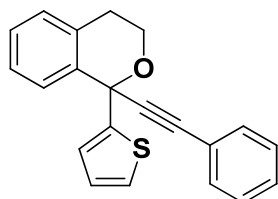

**1-(Phenylethynyl)-1-(thiophen-2-yl)isochroman (3j)**

Colorless oil. Yield: 28.9 mg (83%)  $^1\text{H}$  NMR (500 MHz,  $\text{CDCl}_3$ )  $\delta$  7.53–7.45 (m, 2H), 7.35–7.27 (m, 5H), 7.25–7.20 (m, 2H), 7.17 (t,  $J = 8.4$  Hz, 2H), 6.95 (dd,  $J = 5.0$ , 3.6 Hz, 1H), 4.39–4.28 (m, 1H), 4.20–4.08 (m, 1H), 3.19–3.07 (m, 1H), 2.94–2.80 (m, 1H).  $^{13}\text{C}$  NMR (126 MHz,  $\text{CDCl}_3$ )  $\delta$  149.0, 138.5, 132.8, 132.1, 129.0, 128.9, 128.5, 128.3, 127.7, 127.3, 126.8, 126.5, 126.2, 122.6, 90.7, 87.0, 74.6, 61.9, 28.6. HRMS (EI)  $m/z$   $[\text{M} + \text{H}]^+$  calculated for  $\text{C}_{21}\text{H}_{17}\text{OS}$ : 317.0995, found: 317.0997.

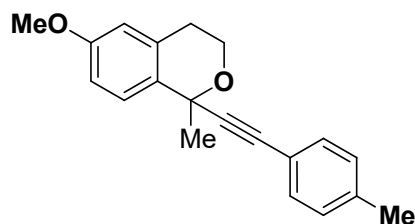

### 6-Methoxy-1-methyl-1-(p-tolylethynyl)isochroman (3k)

Colorless oil. Yield: 15.1 mg (51%).  $^1\text{H}$  NMR (500 MHz,  $\text{CDCl}_3$ )  $\delta$  7.31–7.23 (m, 3H), 7.07 (d,  $J = 7.9$  Hz, 2H), 6.83–6.76 (m, 1H), 6.63 (d,  $J = 2.5$  Hz, 1H), 4.27–4.17 (m, 1H), 4.14–4.04 (m, 1H), 3.80 (s, 3H), 3.15–2.97 (m, 1H), 2.74–2.52 (m, 1H), 2.32 (s, 3H), 1.86 (s, 3H).  $^{13}\text{C}$  NMR (126 MHz,  $\text{CDCl}_3$ )  $\delta$  158.4, 138.4, 134.1, 132.5, 131.8, 129.0, 127.3, 119.9, 113.3, 113.1, 91.8, 84.6, 71.8, 61.5, 55.4, 31.0, 29.3, 21.6. HRMS (EI)  $m/z$   $[\text{M} + \text{H}]^+$  calculated for  $\text{C}_{20}\text{H}_{21}\text{O}_2$ : 293.1536, found: 293.1539.

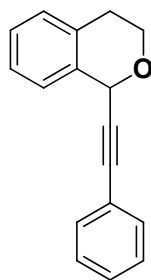

### 1-(Phenylethynyl)isochroman (3l)

Colorless oil. Yield: 15.2 mg (65%)  $^1\text{H}$  NMR (500 MHz,  $\text{CDCl}_3$ )  $\delta$  7.49–7.45 (m, 2H), 7.40–7.35 (m, 1H), 7.35–7.28 (m, 3H), 7.26–7.21 (m, 2H), 7.19–7.13 (m, 1H), 5.80 (s, 1H), 4.32–4.27 (m, 1H), 4.09–4.00 (m, 1H), 3.01–2.84 (m, 2H);  $^{13}\text{C}$  NMR (126 MHz,  $\text{CDCl}_3$ )  $\delta$  135.1, 133.0, 132.1, 129.2, 128.7, 128.4, 127.4, 126.6, 126.2, 122.7, 88.3, 85.9, 67.5, 62.9, 28.2; HRMS (EI)  $m/z$   $[\text{M} + \text{H}]^+$  calculated for  $\text{C}_{17}\text{H}_{15}\text{O}$ : 235.1117, found: 235.1115.

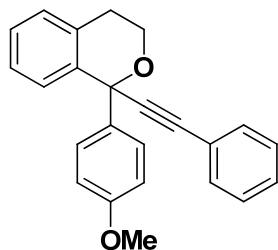

#### 1-(4-Methoxyphenyl)-1-(phenylethynyl)isochroman (4a)

Colorless oil. Yield: 31.2 mg (91%).  $^1\text{H}$  NMR (400 MHz,  $\text{CDCl}_3$ )  $\delta$  7.60–7.53 (m, 2H), 7.52–7.45 (m, 2H), 7.36–7.27 (m, 3H), 7.23–7.09 (m, 3H), 7.04 (d,  $J = 7.9$  Hz, 1H), 6.94–6.78 (m, 2H), 4.46–4.35 (m, 1H), 4.20–4.11 (m, 1H), 3.81 (s, 3H), 3.23–3.17 (m, 1H), 2.87–2.78 (m, 1H).  $^{13}\text{C}$  NMR (101 MHz,  $\text{CDCl}_3$ )  $\delta$  159.7, 139.5, 136.3, 133.2, 131.9, 129.4, 128.9, 128.7, 128.5, 128.4, 127.2, 126.5, 122.9, 113.6, 90.8, 88.5, 77.5, 62.0, 55.5, 28.8. HRMS (EI)  $m/z$   $[\text{M} + \text{H}]^+$  calculated for  $\text{C}_{24}\text{H}_{21}\text{O}_2$ : 341.1536, found: 341.1539.

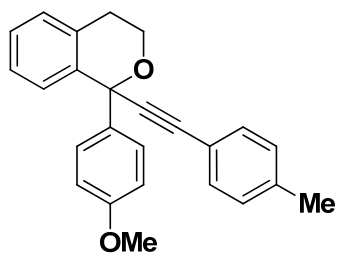

#### 1-(4-Methoxyphenyl)-1-(p-tolyethynyl)isochroman (4b)

Colorless oil. Yield: 32.6 mg (92%).  $^1\text{H}$  NMR (400 MHz,  $\text{CDCl}_3$ )  $\delta$  7.59–7.52 (m, 2H), 7.38 (d,  $J = 8.1$  Hz, 2H), 7.22–7.08 (m, 5H), 7.03 (d,  $J = 7.7$  Hz, 1H), 6.93–6.81 (m, 2H), 4.43–4.36 (m, 1H), 4.18–4.09 (m, 1H), 3.80 (s, 3H), 3.25–3.16 (m, 1H), 2.86–2.77 (m, 1H), 2.35 (s, 3H).  $^{13}\text{C}$  NMR (101 MHz,  $\text{CDCl}_3$ )  $\delta$  159.6, 139.6, 138.8, 136.4, 133.2, 131.9, 129.4, 129.2, 128.9, 128.6, 127.1, 126.5, 119.8, 113.6, 90.0, 88.7, 77.4, 61.9, 55.5, 28.8, 21.7. HRMS (EI)  $m/z$   $[\text{M} + \text{H}]^+$  calculated for  $\text{C}_{25}\text{H}_{23}\text{O}_2$ : 355.1693, found: 355.1695.

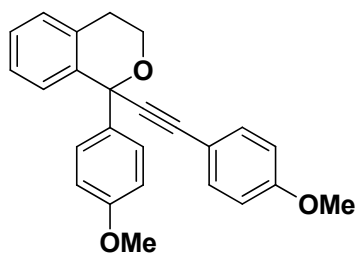

**1-(4-Methoxyphenyl)-1-((4-methoxyphenyl)ethynyl)isochroman (4c)**

Colorless oil. Yield: 35.2 mg (95%).  $^1\text{H}$  NMR (400 MHz,  $\text{CDCl}_3$ )  $\delta$  7.61–7.51 (m, 2H), 7.48–7.35 (m, 2H), 7.22–7.08 (m, 3H), 7.03 (d,  $J = 7.5$  Hz, 1H), 6.91–6.79 (m, 4H), 4.45–4.34 (m, 1H), 4.18–4.09 (m, 1H), 3.81 (s, 3H), 3.80 (s, 3H), 3.24–3.15 (m, 1H), 2.86–2.77 (m, 1H).  $^{13}\text{C}$  NMR (101 MHz,  $\text{CDCl}_3$ )  $\delta$  159.9, 159.6, 139.7, 136.5, 133.5, 133.2, 129.4, 128.9, 128.6, 127.1, 126.5, 115.1, 114.0, 113.6, 89.4, 88.4, 77.2, 61.9, 55.5, 28.8. HRMS (EI)  $m/z$   $[\text{M} + \text{H}]^+$  calculated for  $\text{C}_{25}\text{H}_{23}\text{O}_3$ : 371.1642, found: 371.1645.

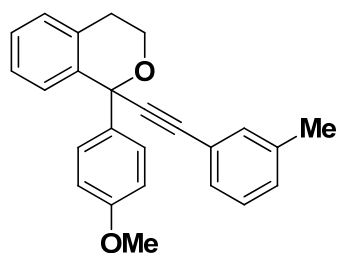

**1-(4-Methoxyphenyl)-1-(m-tolylethynyl)isochroman (4d)**

Colorless oil. Yield: 32.9 mg (93%).  $^1\text{H}$  NMR (400 MHz,  $\text{CDCl}_3$ )  $\delta$  7.63–7.48 (m, 2H), 7.31 (dd,  $J = 6.2, 5.3$  Hz, 2H), 7.25–7.08 (m, 5H), 7.06–6.97 (m, 1H), 6.92–6.79 (m, 2H), 4.46–4.36 (m, 1H), 4.19–4.12 (m, 1H), 3.81 (s, 3H), 3.26–3.20 (m, 1H), 2.86–2.78 (m, 1H), 2.33 (s, 3H).  $^{13}\text{C}$  NMR (101 MHz,  $\text{CDCl}_3$ )  $\delta$  159.6, 139.6, 138.1, 136.4, 133.2, 132.6, 129.5, 129.34, 129.1, 128.9, 128.5, 128.3, 127.1, 126.5, 122.7, 113.6, 90.4, 88.7, 77.4, 62.0, 55.5, 28.8, 21.4. HRMS (EI)  $m/z$   $[\text{M} + \text{H}]^+$  calculated for  $\text{C}_{25}\text{H}_{23}\text{O}_2$ : 355.1693, found: 355.1696.



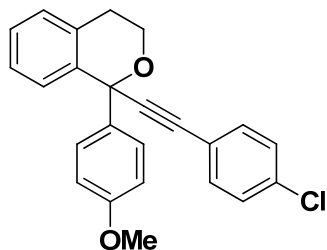

**1-((4-Chlorophenyl)ethynyl)-1-(4-methoxyphenyl)isochroman (4e)**

Colorless oil. Yield: 33.7 mg (90%).  $^1\text{H}$  NMR (400 MHz,  $\text{CDCl}_3$ )  $\delta$  7.58–7.50 (m, 2H), 7.47–7.37 (m, 2H), 7.34–7.27 (m, 2H), 7.24–7.07 (m, 3H), 7.03 (d,  $J = 7.8$  Hz, 1H), 6.93–6.81 (m, 2H), 4.43–4.31 (m, 1H), 4.18–4.09 (m, 1H), 3.80 (s, 3H), 3.24–3.18 (m, 1H), 2.86–2.77 (m, 1H).  $^{13}\text{C}$  NMR (101 MHz,  $\text{CDCl}_3$ )  $\delta$  159.7, 139.2, 136.1, 134.7, 133.2, 129.3, 129.0, 128.8, 128.5, 127.3, 126.5, 121.4, 113.7, 91.8, 87.3, 77.5, 62.0, 55.5, 28.8. HRMS (EI)  $m/z$   $[\text{M} + \text{H}]^+$  calculated for  $\text{C}_{24}\text{H}_{20}\text{ClO}_2$ : 375.1146 found: 375.1142.

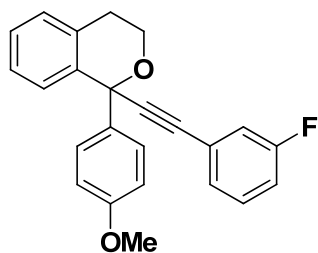

**1-((3-Fluorophenyl)ethynyl)-1-(4-methoxyphenyl)isochroman (4f)**

Colorless oil. Yield: 32.9 mg (92%).  $^1\text{H}$  NMR (500 MHz,  $\text{CDCl}_3$ )  $\delta$  7.58–7.48 (m, 2H), 7.34–7.24 (m, 2H), 7.24–7.08 (m, 4H), 7.08–6.96 (m, 2H), 6.95–6.77 (m, 2H), 4.43–4.29 (m, 1H), 4.19–4.10 (m, 1H), 3.81 (s, 3H), 3.24–3.17 (m, 1H), 2.87–2.78 (m, 1H).  $^{13}\text{C}$  NMR (126 MHz,  $\text{CDCl}_3$ )  $\delta$  163.5 (d,  $J_{\text{C-F}} = 246.6$  Hz), 159.7, 139.2, 136.1, 133.3, 130.1 (d,  $J_{\text{C-F}} = 8.6$  Hz), 129.3, 129.0, 128.5, 127.9 (d,  $J_{\text{C-F}} = 3.1$  Hz), 127.3, 126.6, 124.8 (d,  $J_{\text{C-F}} = 9.4$  Hz), 118.9 (d,  $J_{\text{C-F}} = 22.8$  Hz), 116.1 (d,  $J_{\text{C-F}} = 21.1$  Hz), 113.7, 91.8, 87.2, 77.5, 62.1, 55.5, 28.8. HRMS (EI)  $m/z$   $[\text{M} + \text{H}]^+$  calculated for  $\text{C}_{24}\text{H}_{20}\text{FO}_2$ : 359.1442, found: 359.1445.

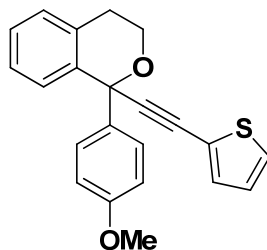

**1-(4-Methoxyphenyl)-1-(thiophen-2-ylethynyl)isochroman (4g)**

Colorless oil. Yield: 30.5 mg (88%).  $^1\text{H}$  NMR (400 MHz,  $\text{CDCl}_3$ )  $\delta$  7.56–7.46 (m, 2H), 7.29–7.24 (m, 2H), 7.22–7.08 (m, 3H), 7.04–6.95 (m, 2H), 6.91–6.82 (m, 2H), 4.42–4.31 (m, 1H), 4.18–4.09 (m, 1H), 3.80 (s, 3H), 3.24–3.18 (m, 1H), 2.86–2.77 (m, 1H).  $^{13}\text{C}$  NMR (101 MHz,  $\text{CDCl}_3$ )  $\delta$  159.7, 139.1, 136.1, 133.3, 132.6, 129.3, 129.0, 128.6, 127.6, 127.3, 127.1, 126.6, 122.8, 113.7, 94.5, 81.7, 77.7, 62.1, 55.5, 28.8. HRMS (EI)  $m/z$   $[\text{M} + \text{H}]^+$  calculated for  $\text{C}_{22}\text{H}_{19}\text{O}_2\text{S}$ : 347.1100, found: 347.1103.

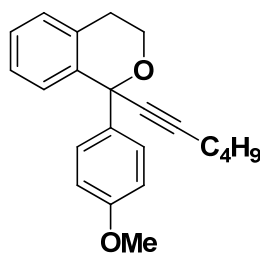

**1-(Hex-1-yn-1-yl)-1-(4-methoxyphenyl)isochroman (4h)**

Colorless oil. Yield: 26.7 mg (83%).  $^1\text{H}$  NMR (400 MHz,  $\text{CDCl}_3$ )  $\delta$  7.55–7.42 (m, 2H), 7.20–7.04 (m, 3H), 6.94 (d,  $J = 7.8$  Hz, 1H), 6.88–6.77 (m, 2H), 4.37–4.26 (m, 1H), 4.11–4.02 (m, 1H), 3.79 (s, 3H), 3.20–3.11 (m, 1H), 2.82–2.74 (m, 1H), 2.35–2.28 (m, 2H), 1.62–1.50 (m, 2H), 1.47–1.37 (m, 2H), 0.91 (t,  $J = 7.3$  Hz, 3H).  $^{13}\text{C}$  NMR (101 MHz,  $\text{CDCl}_3$ )  $\delta$  159.5, 140.2, 136.8, 133.0, 129.3, 128.8, 128.4, 126.9, 126.3, 113.5, 89.5, 81.7, 77.2, 61.6, 55.5, 30.9, 28.8, 22.3, 18.9, 13.8. HRMS (EI)  $m/z$   $[\text{M} + \text{H}]^+$  calculated for  $\text{C}_{22}\text{H}_{24}\text{O}_2$ : 321.1849, found: 321.1846.

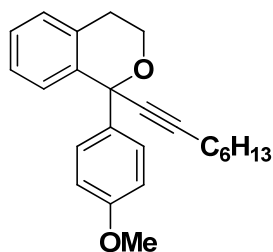

#### 1-(4-Methoxyphenyl)-1-(oct-1-yn-1-yl)isochroman (4i)

Colorless oil. Yield: 29.9 mg (86%).  $^1\text{H}$  NMR (400 MHz,  $\text{CDCl}_3$ )  $\delta$  7.53–7.42 (m, 2H), 7.21–7.04 (m, 3H), 6.94 (d,  $J = 7.7$  Hz, 1H), 6.87–6.76 (m, 2H), 4.36–4.23 (m, 1H), 4.11–4.02 (m, 1H), 3.79 (s, 3H), 3.19–3.10 (m, 1H), 2.82–2.73 (m, 1H), 2.31 (t,  $J = 7.1$  Hz, 2H), 1.62–1.51 (m, 2H), 1.49–1.37 (m, 2H), 1.34–1.23 (m, 4H), 0.88 (t,  $J = 6.9$  Hz, 3H).  $^{13}\text{C}$  NMR (101 MHz,  $\text{CDCl}_3$ )  $\delta$  159.5, 140.2, 136.8, 133.0, 129.4, 128.8, 128.4, 126.9, 126.3, 113.5, 89.6, 81.8, 77.2, 61.6, 55.5, 31.5, 28.8, 28.8, 22.8, 19.2, 14.2. HRMS (EI)  $m/z$   $[\text{M} + \text{H}]^+$  calculated for  $\text{C}_{24}\text{H}_{29}\text{O}_2$ : 349.2162, found: 349.2159.

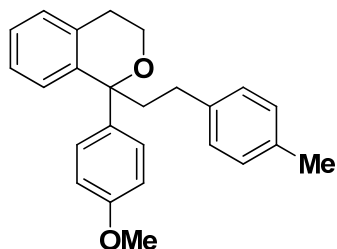

#### 1-(4-Methoxyphenyl)-1-(4-methylphenethyl)isochroman (5)

Colorless oil. Yield: 28.7 mg (90%).  $^1\text{H}$  NMR (500 MHz,  $\text{CDCl}_3$ )  $\delta$  7.33–7.16 (m, 6H), 7.12–6.94 (m, 4H), 6.87–6.73 (m, 2H), 3.94–3.83 (m, 1H), 3.78 (s, 3H), 3.70–3.58 (m, 1H), 3.21–3.02 (m, 1H), 2.88–2.72 (m, 1H), 2.71–2.60 (m, 1H), 2.59–2.44 (m, 1H), 2.42–2.19 (m, 5H).  $^{13}\text{C}$  NMR (126 MHz,  $\text{CDCl}_3$ )  $\delta$  158.8, 139.9, 138.4, 138.2, 135.2, 135.2, 129.5, 129.2, 128.8, 128.5, 127.6, 126.7, 125.9, 113.4, 80.9, 59.9, 55.4, 45.4, 30.5, 29.3, 21.2. HRMS (EI)  $m/z$   $[\text{M} + \text{H}]^+$  calculated for  $\text{C}_{25}\text{H}_{27}\text{O}_2$ : 359.2006, found: 359.2002.

**Reference:**

1. Srimoyee Dasgupta, Thomas Rivas, and Mary P. Watson, *Angew. Chem. Int. Ed.* **2015**, *54*, 14154–14158.
2. Benaissa Bouguerne, Pascal Hoffmann, and Christian Lherbet, *Synthetic Communications*. **2010**, *40*, 915–926.

# <sup>1</sup>H and <sup>13</sup>C NMR spectra

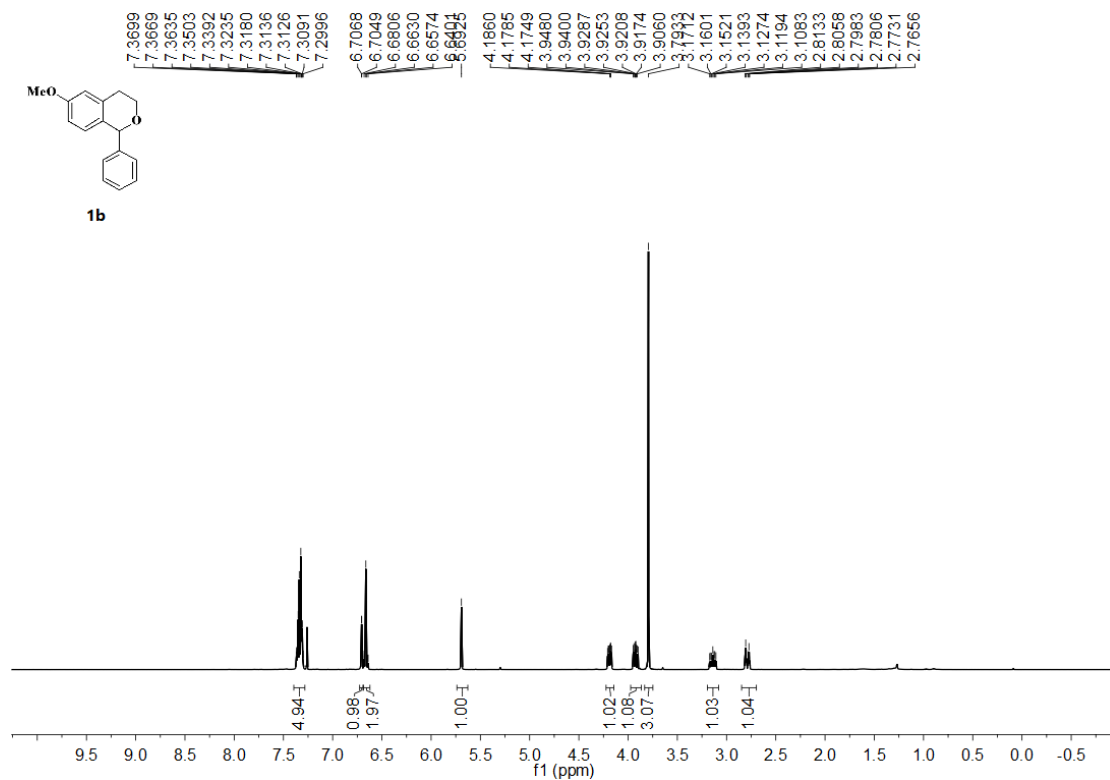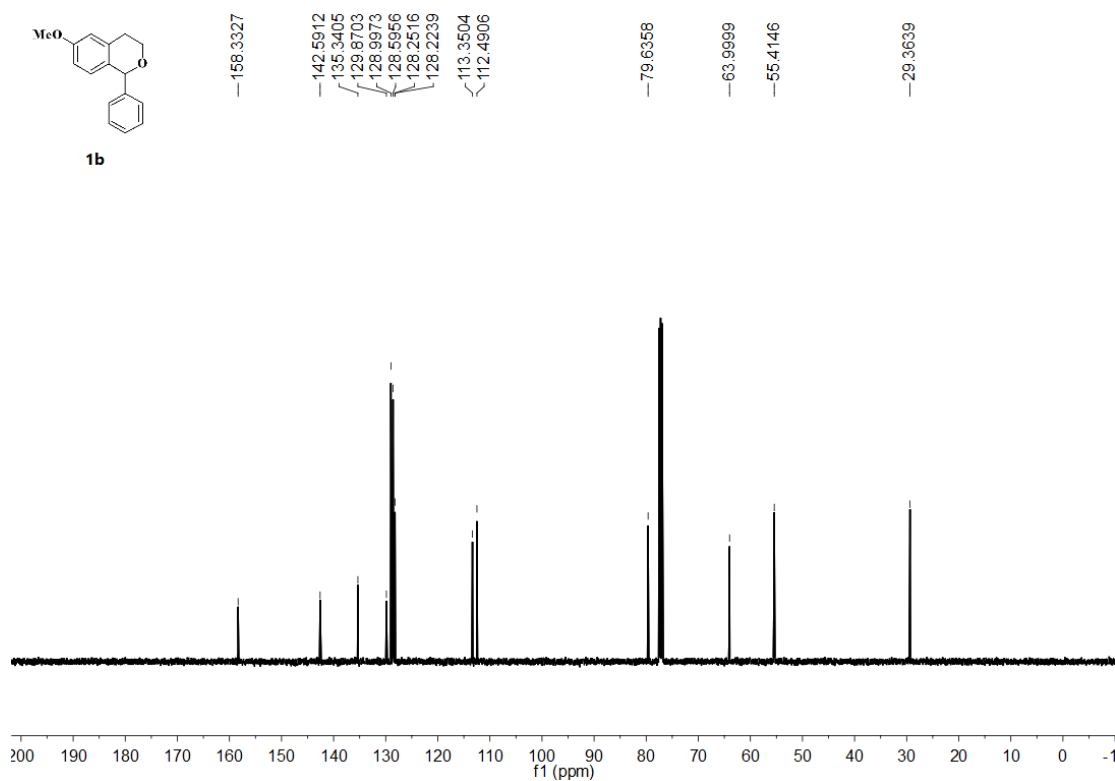

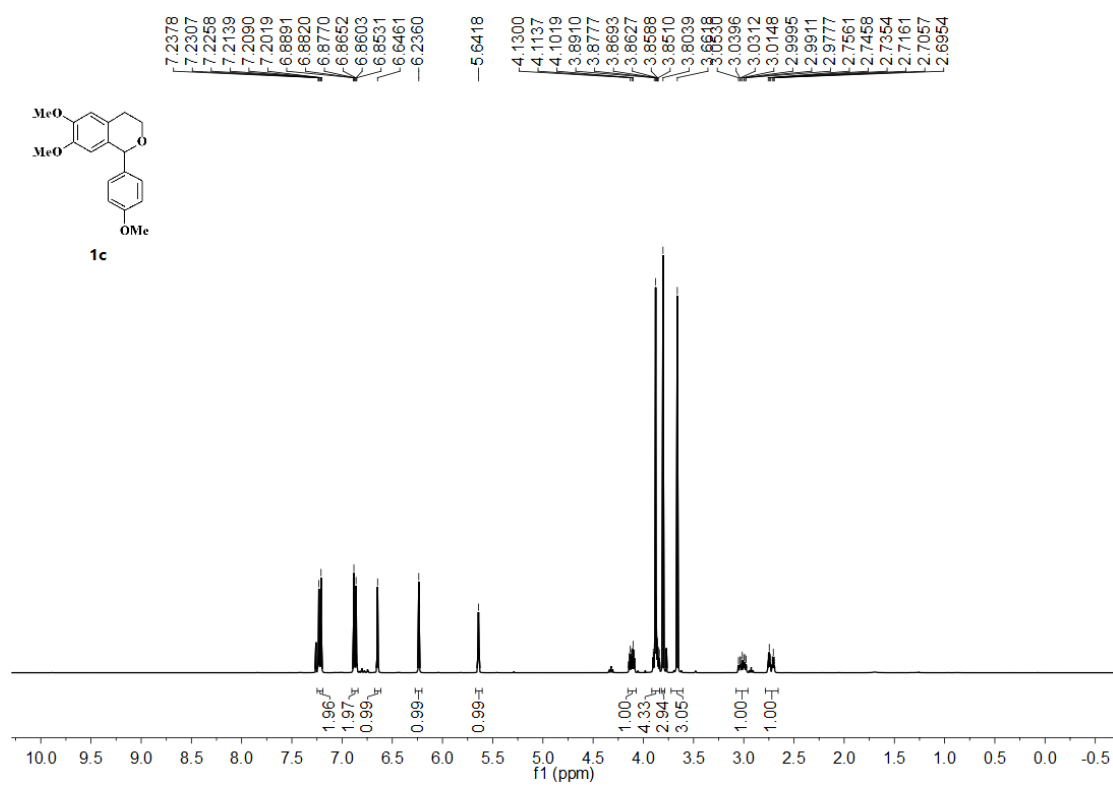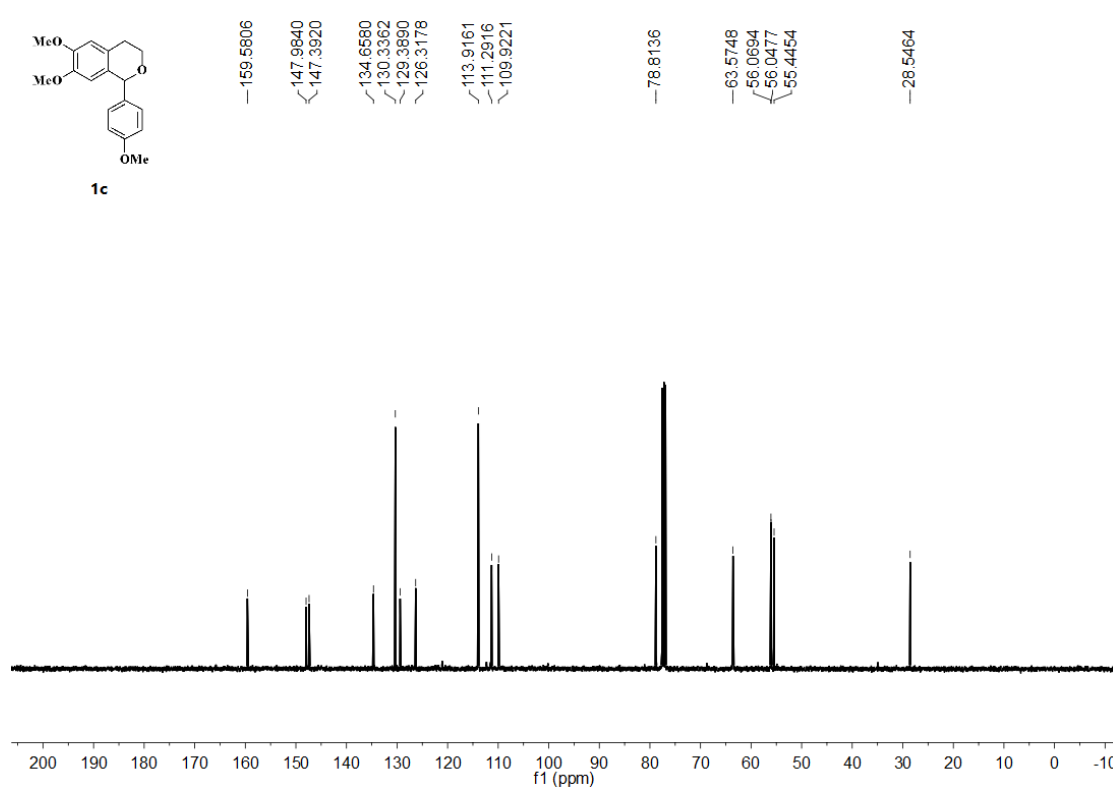

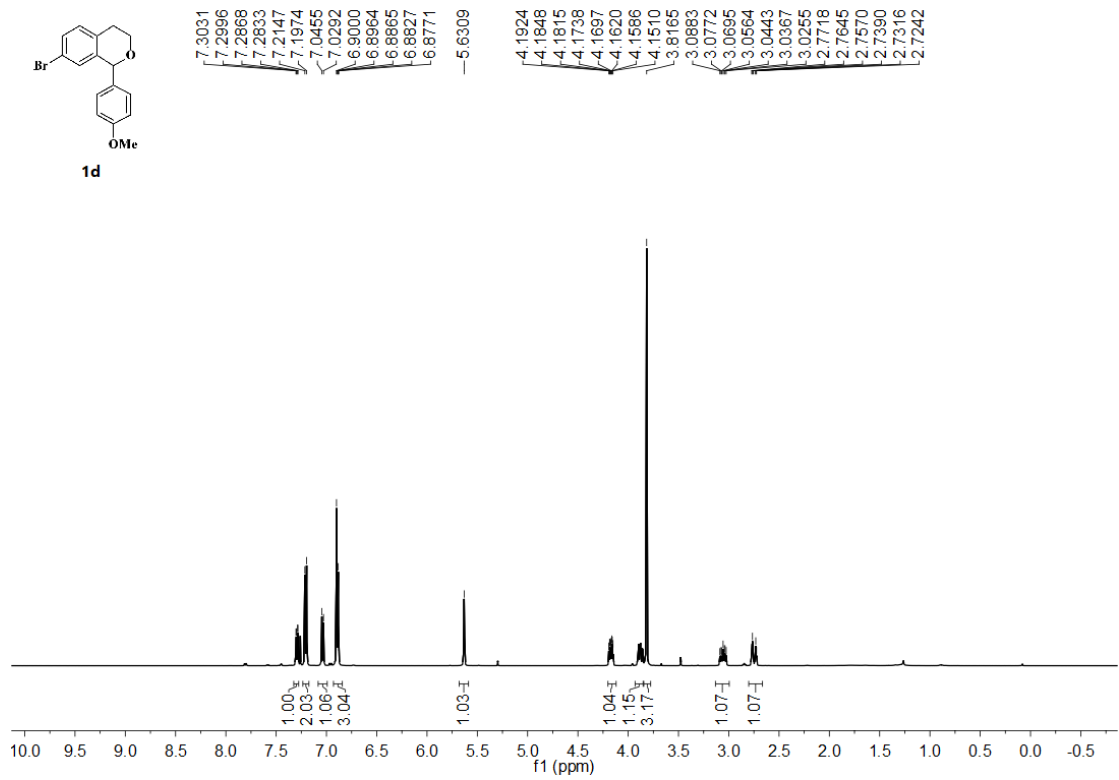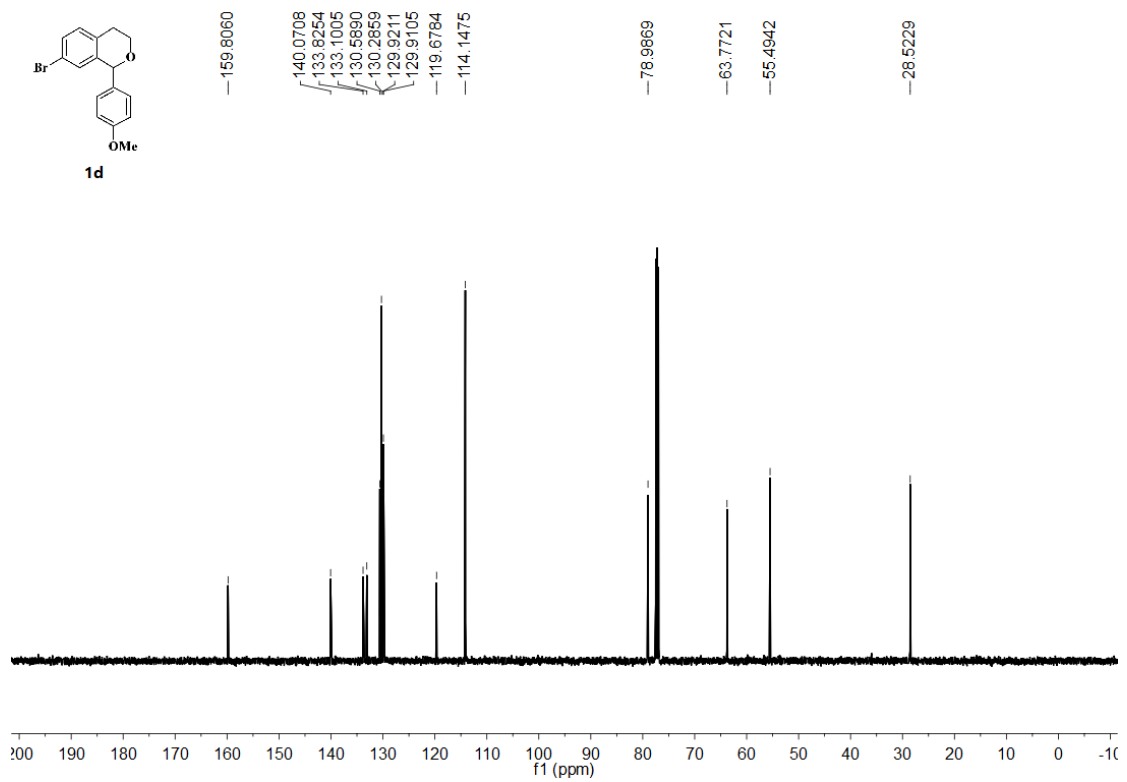

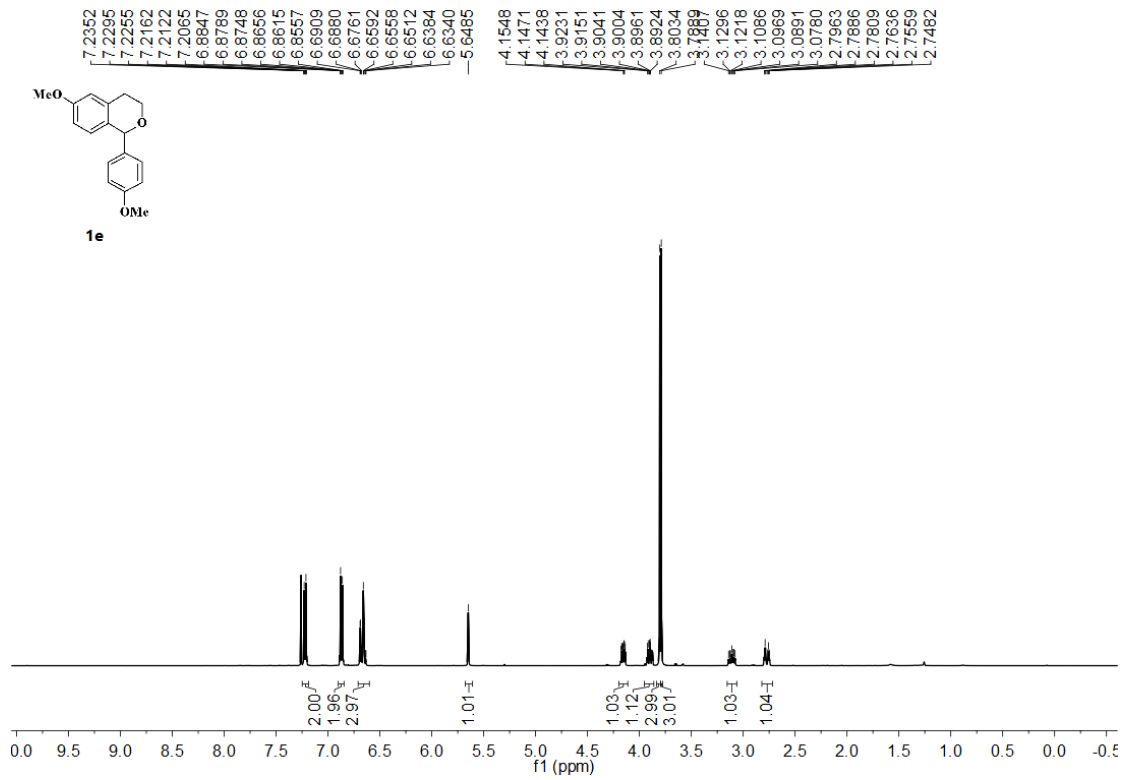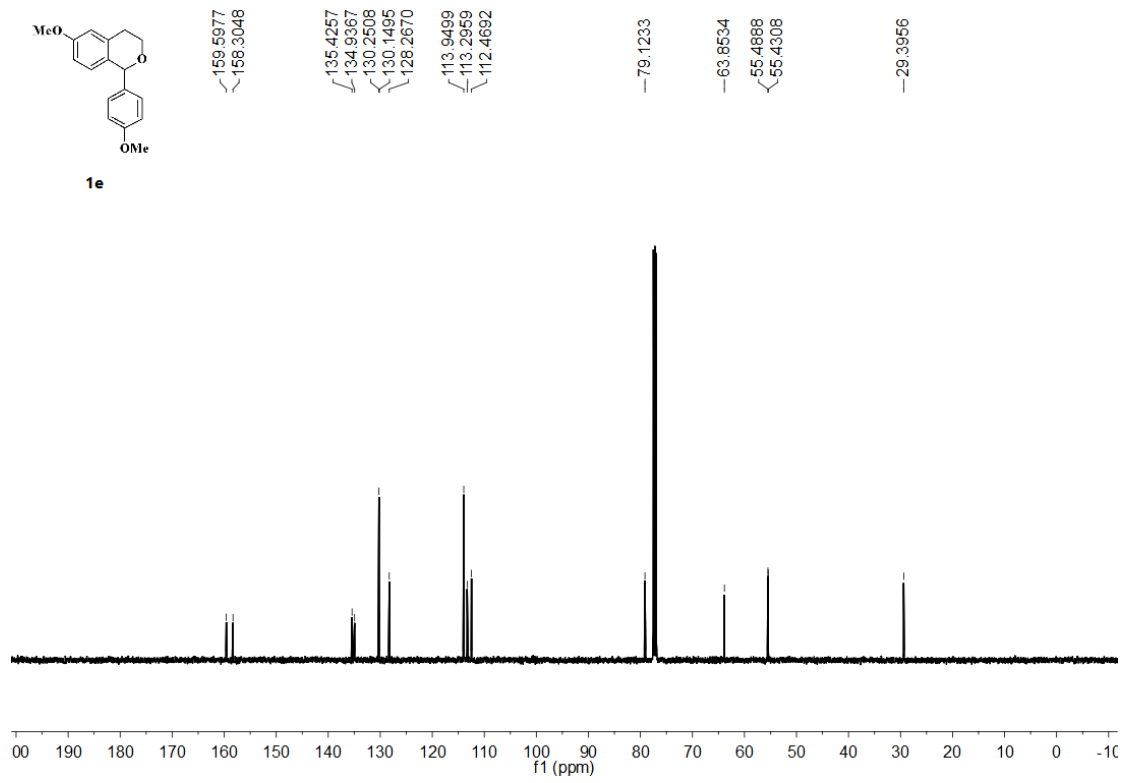



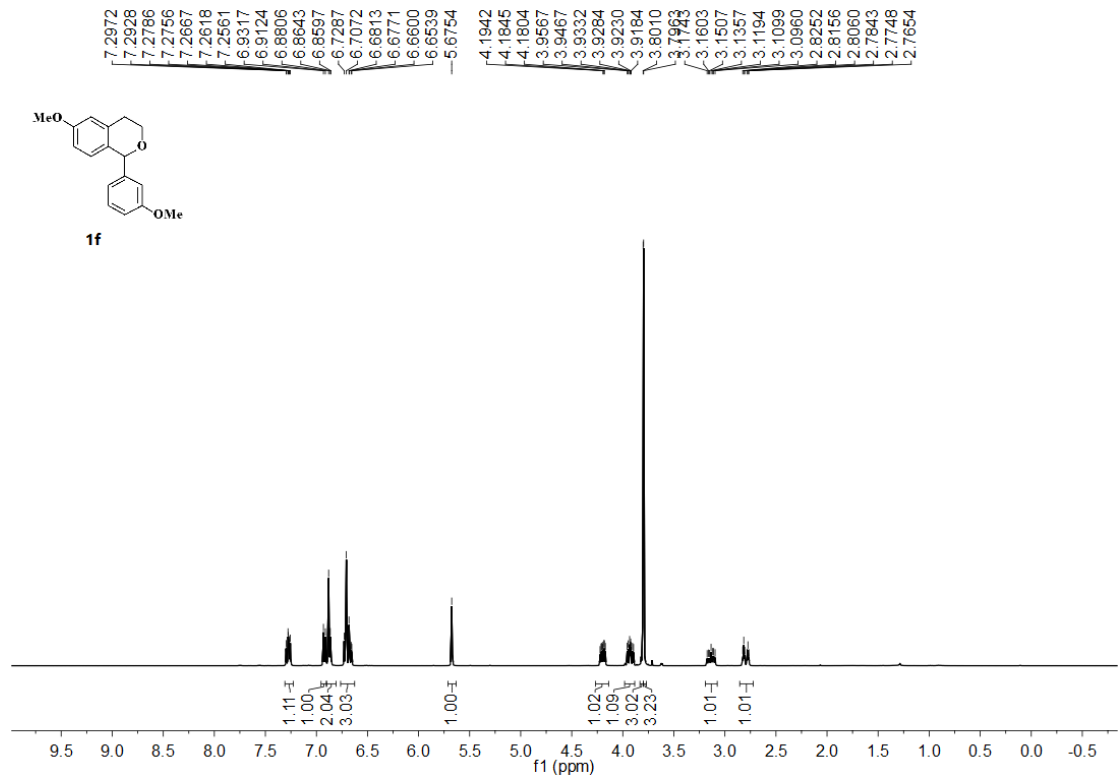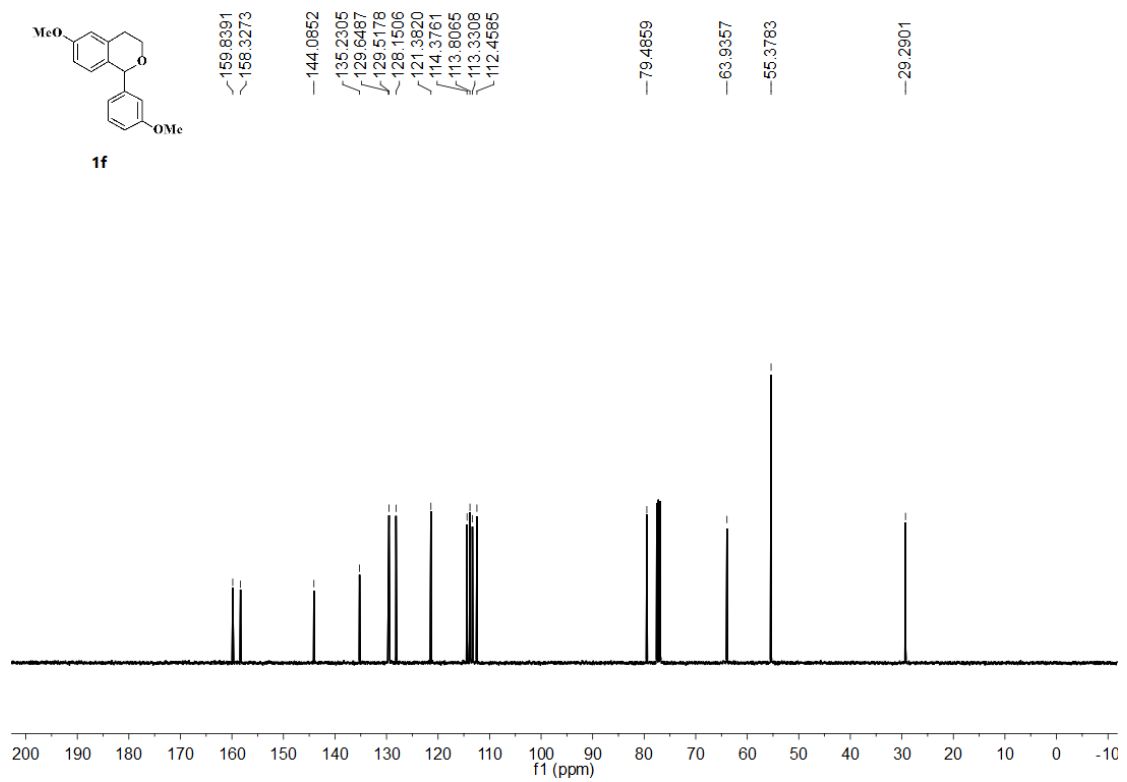

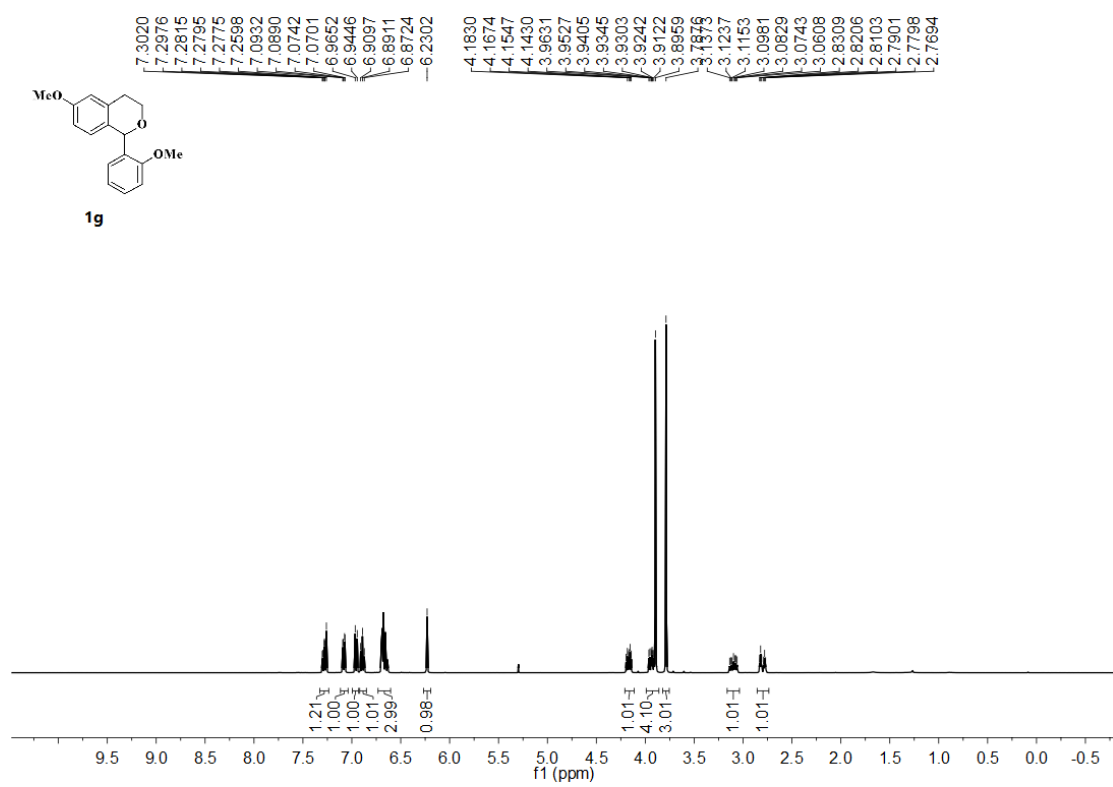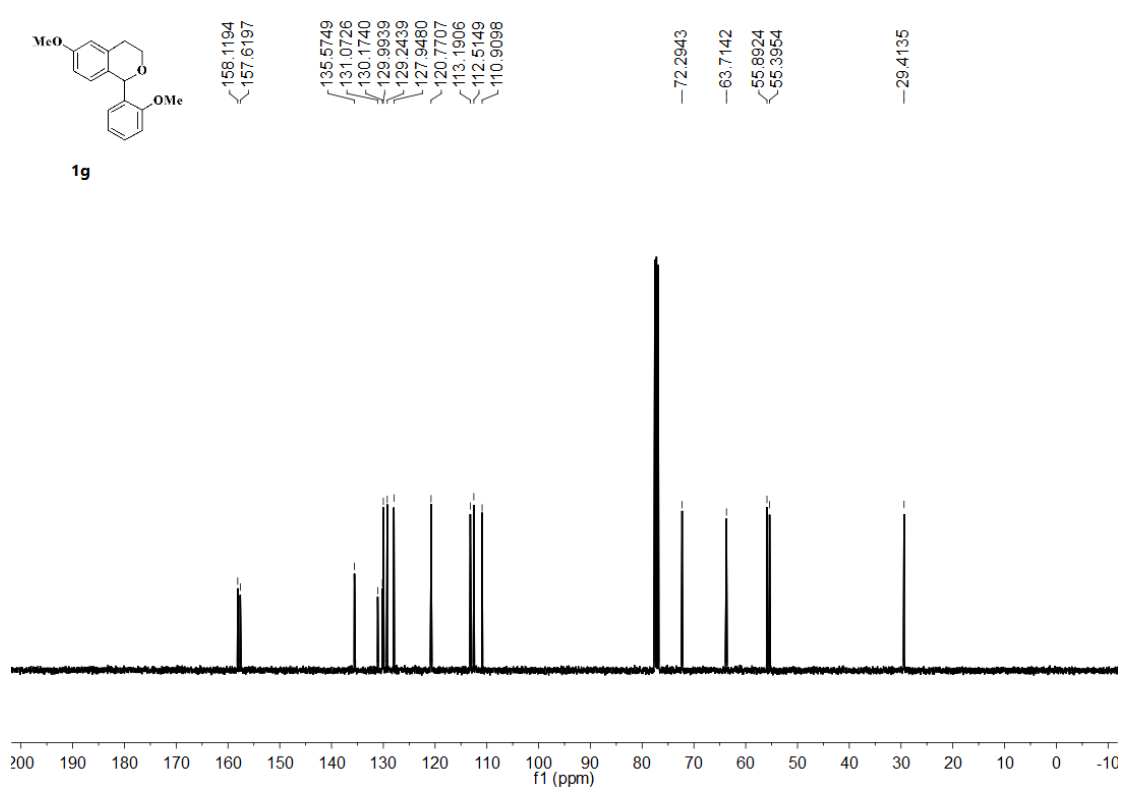

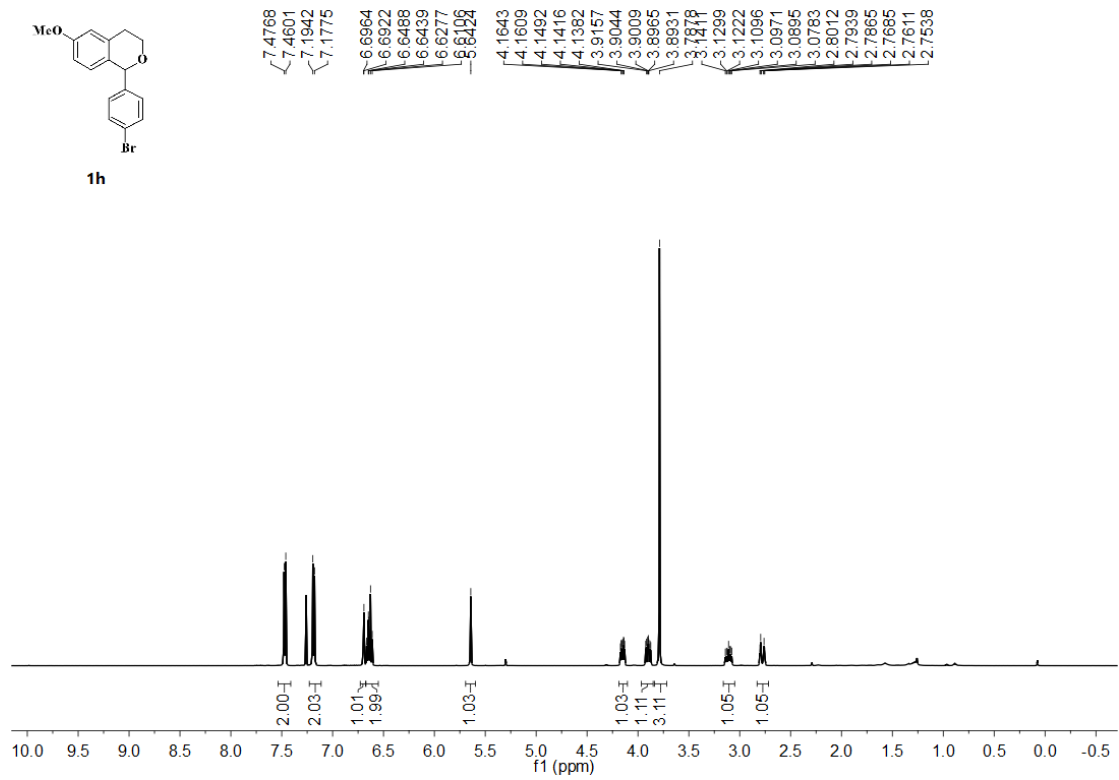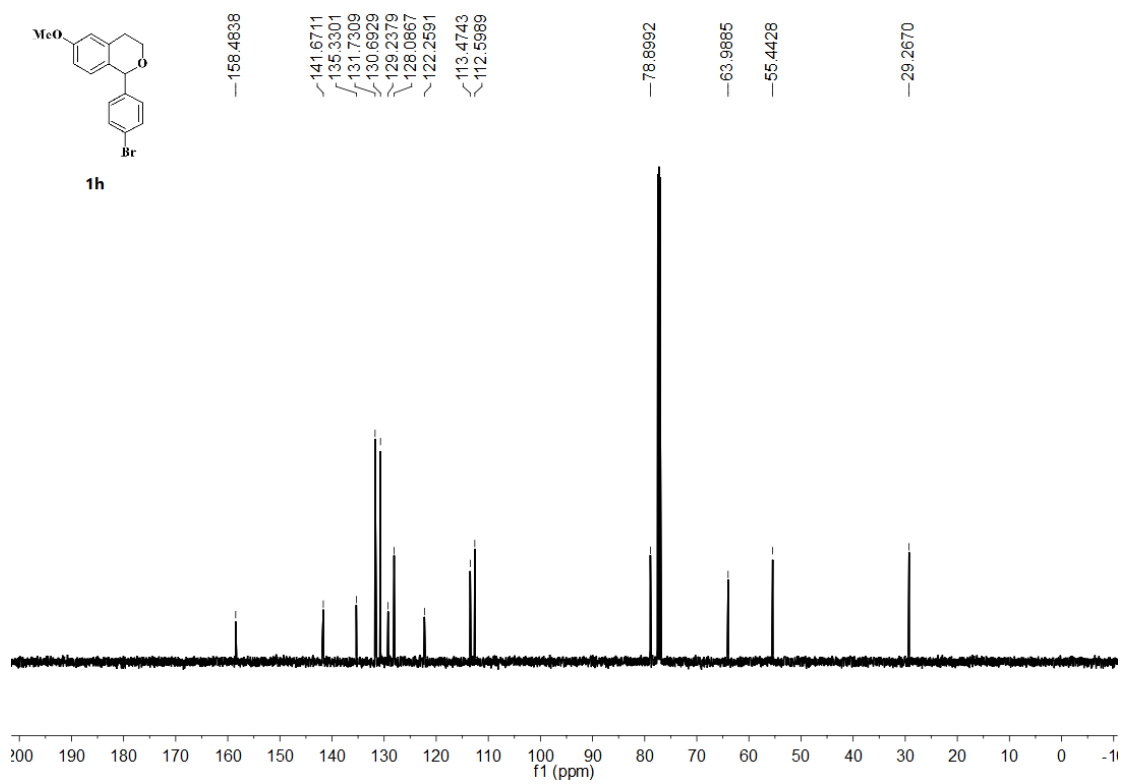

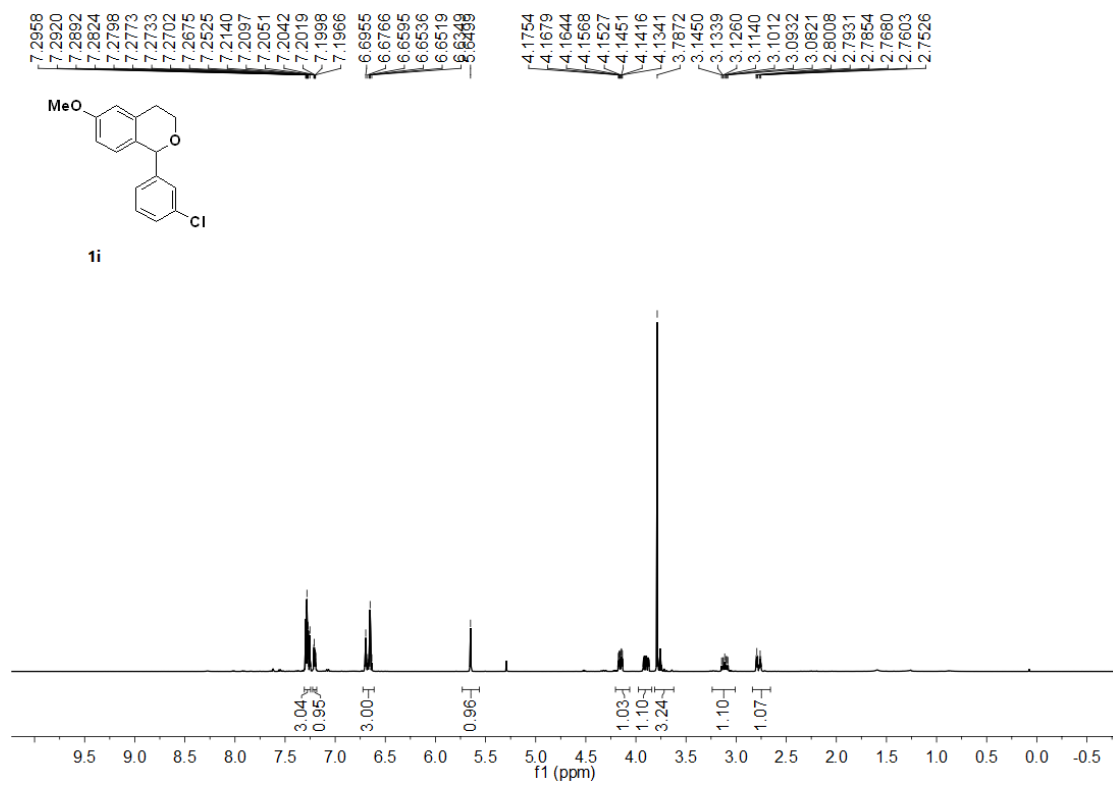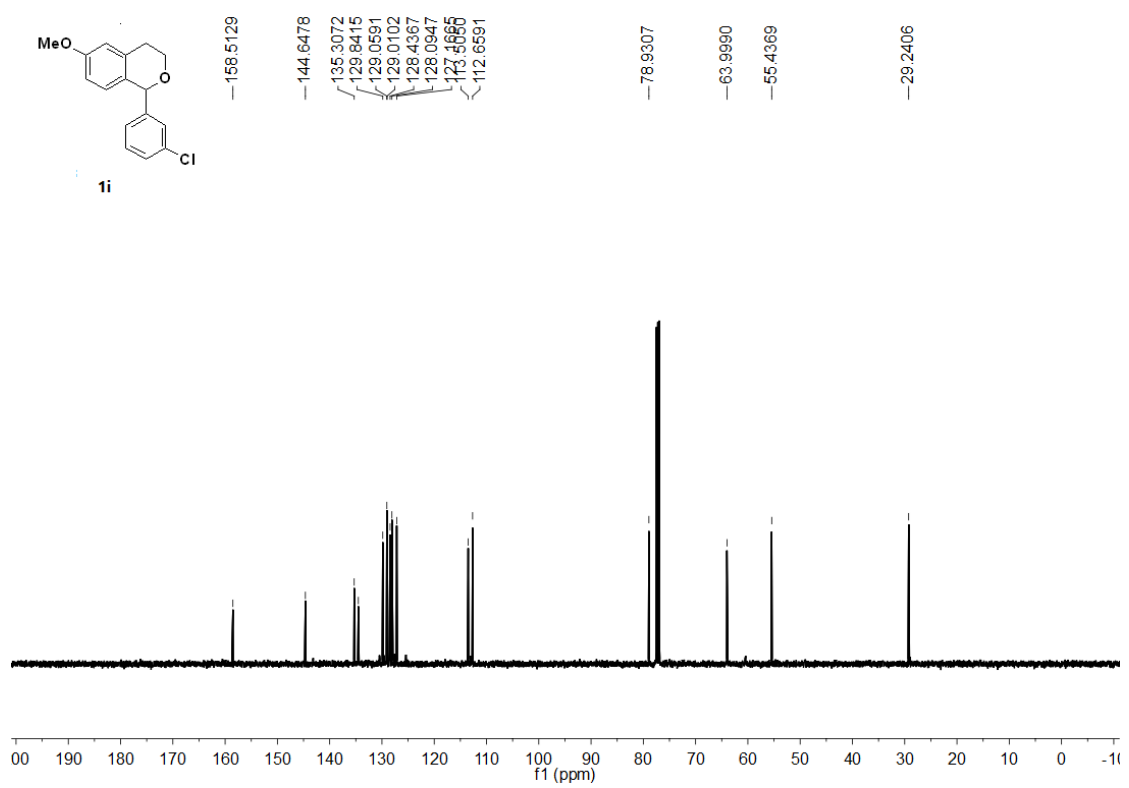

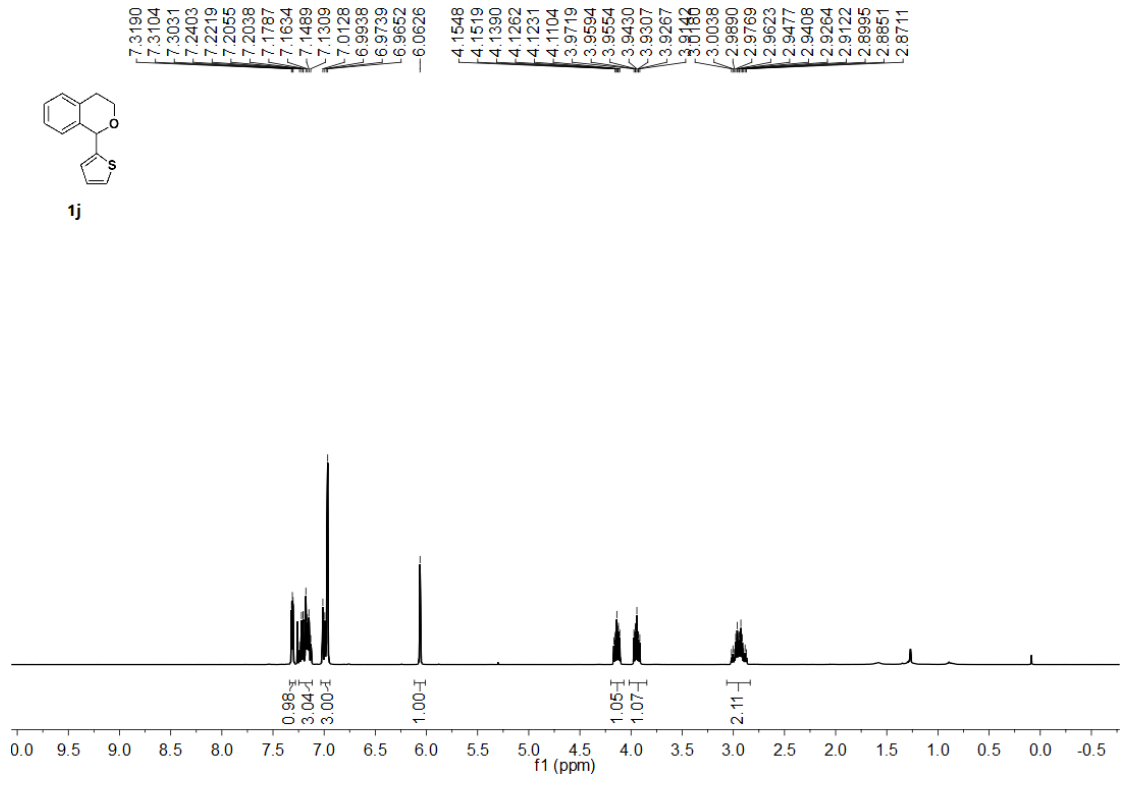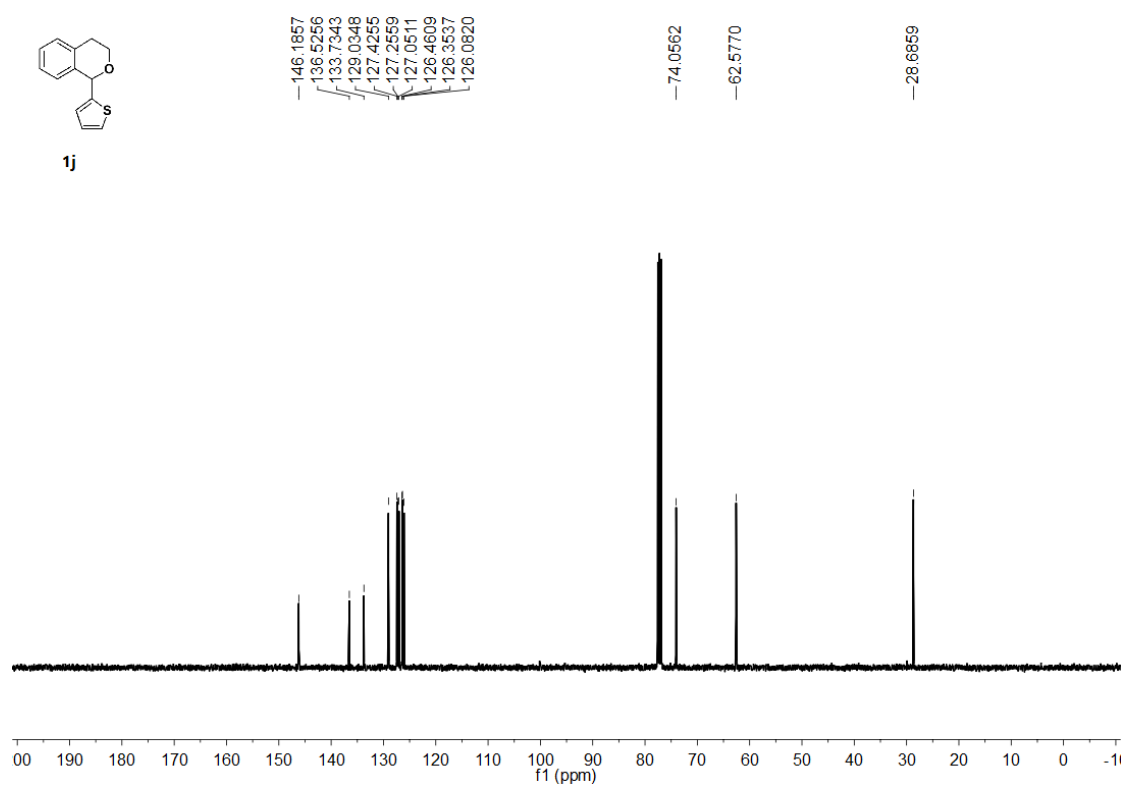

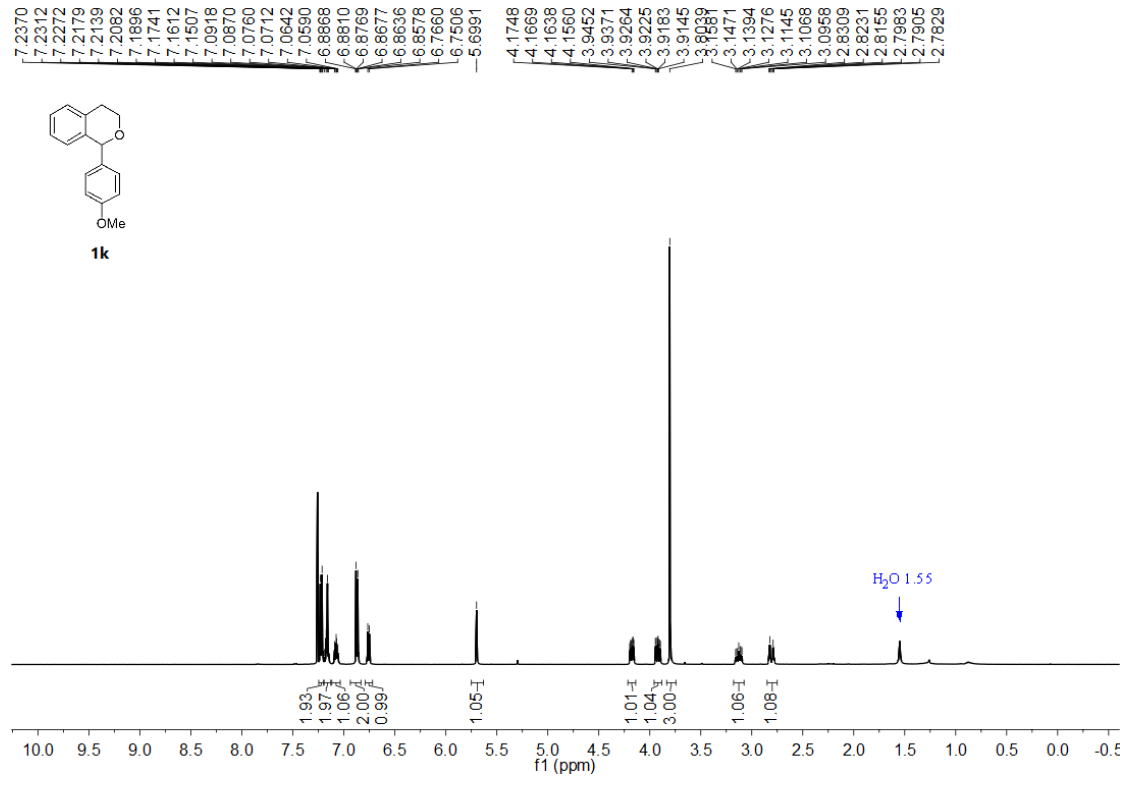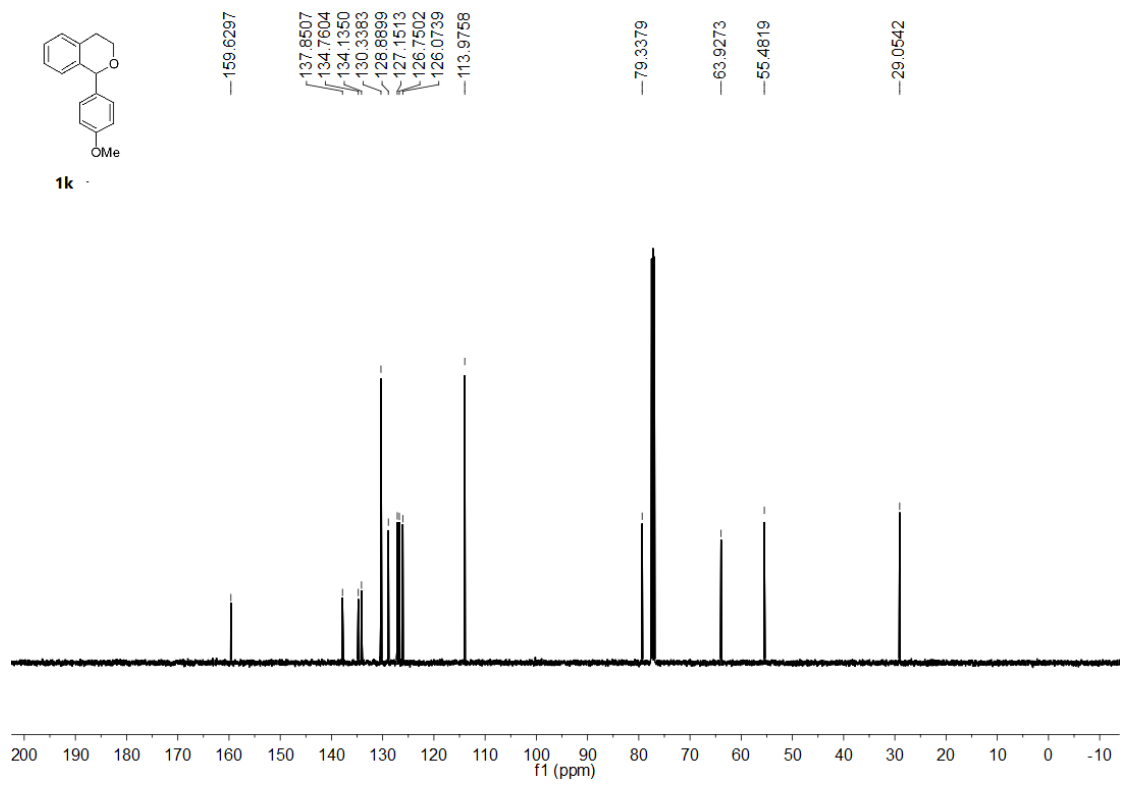

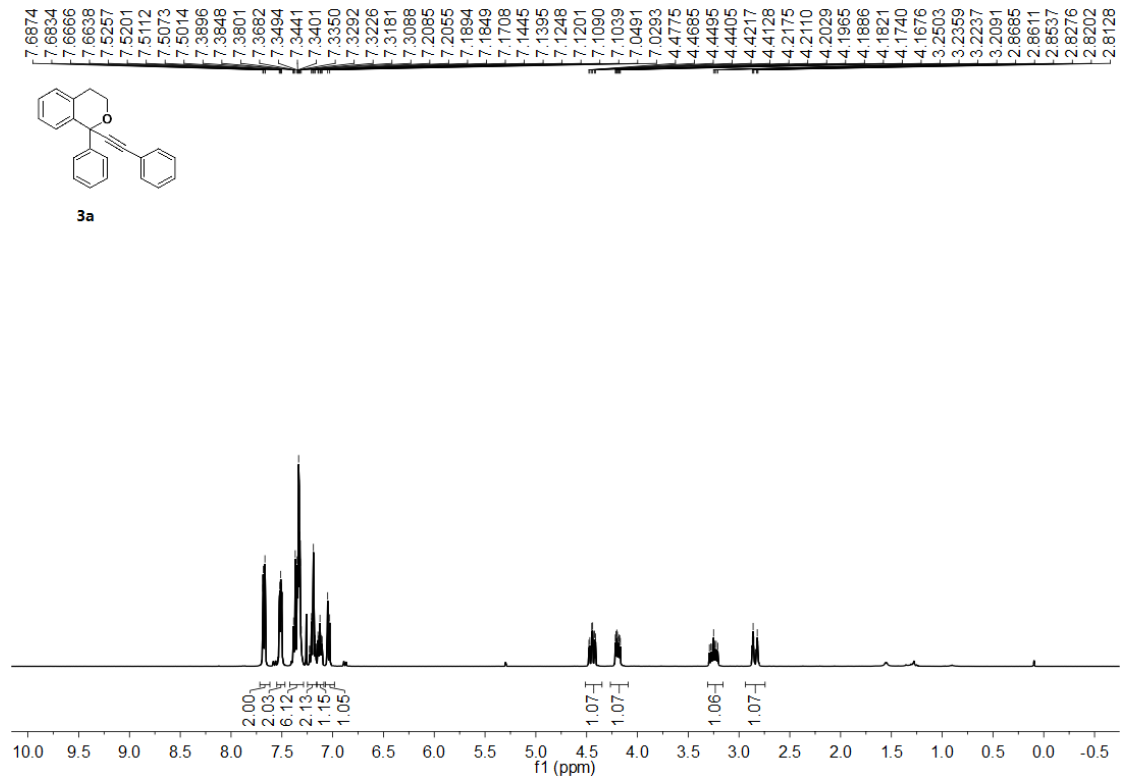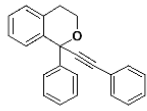

3a

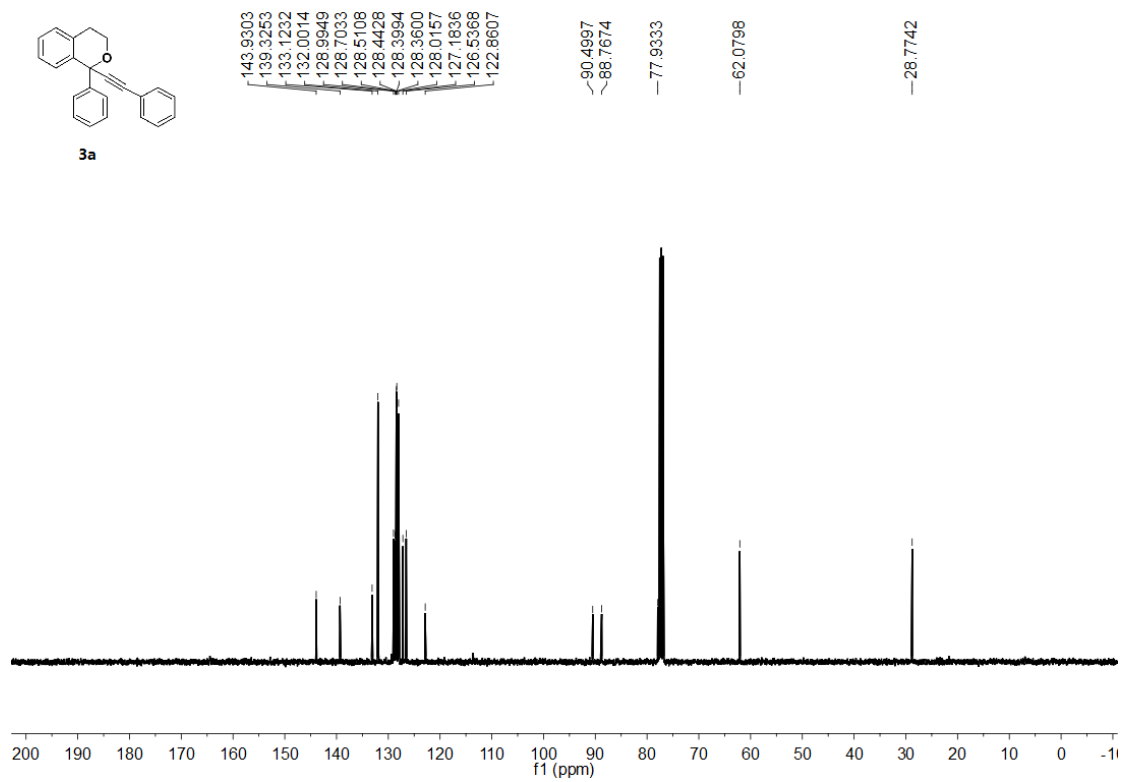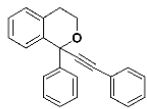

3a

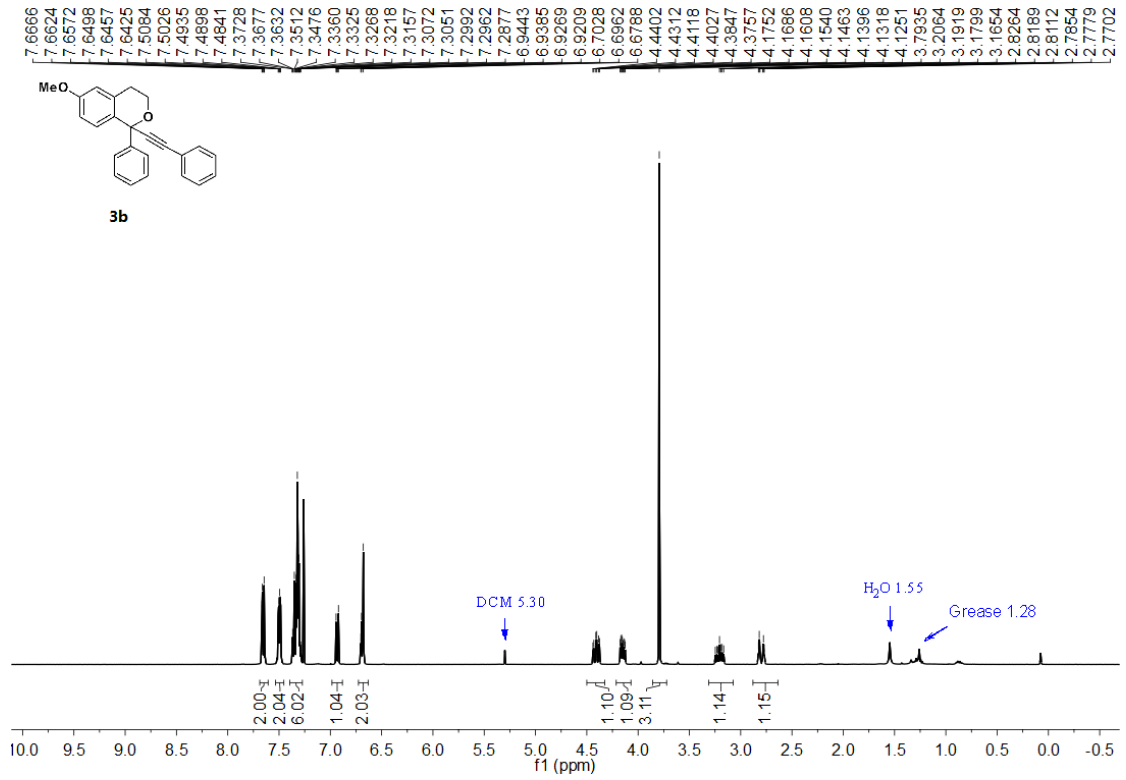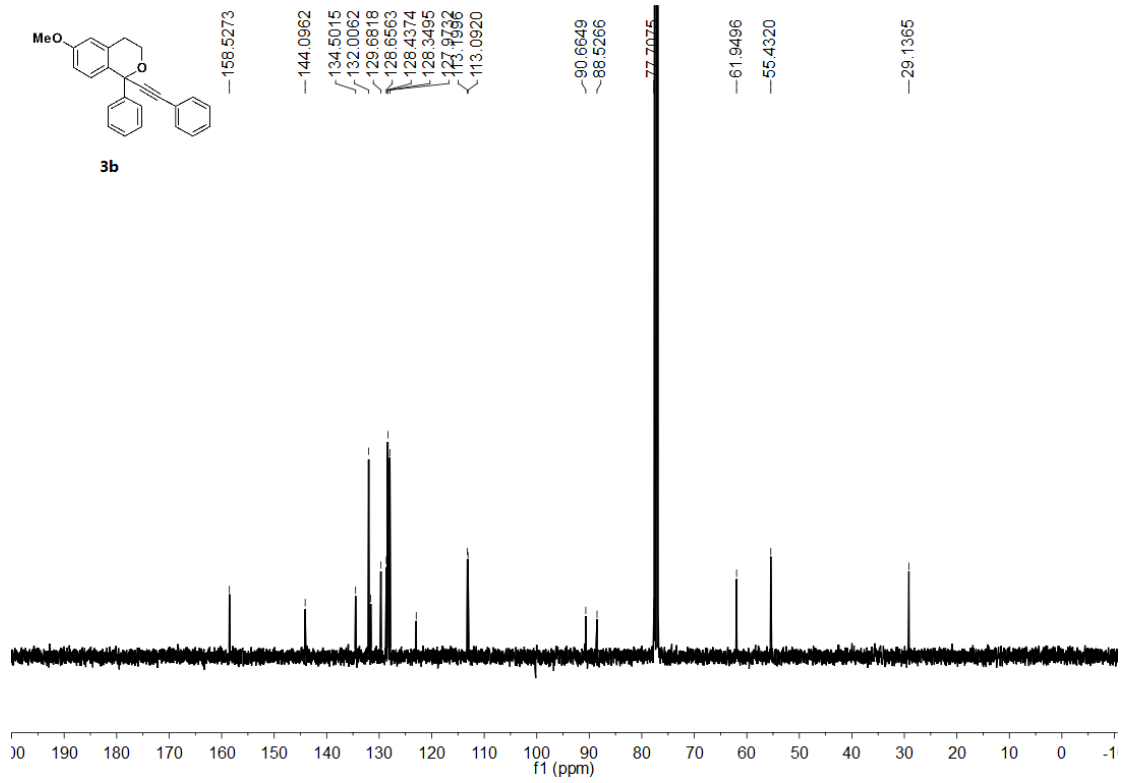



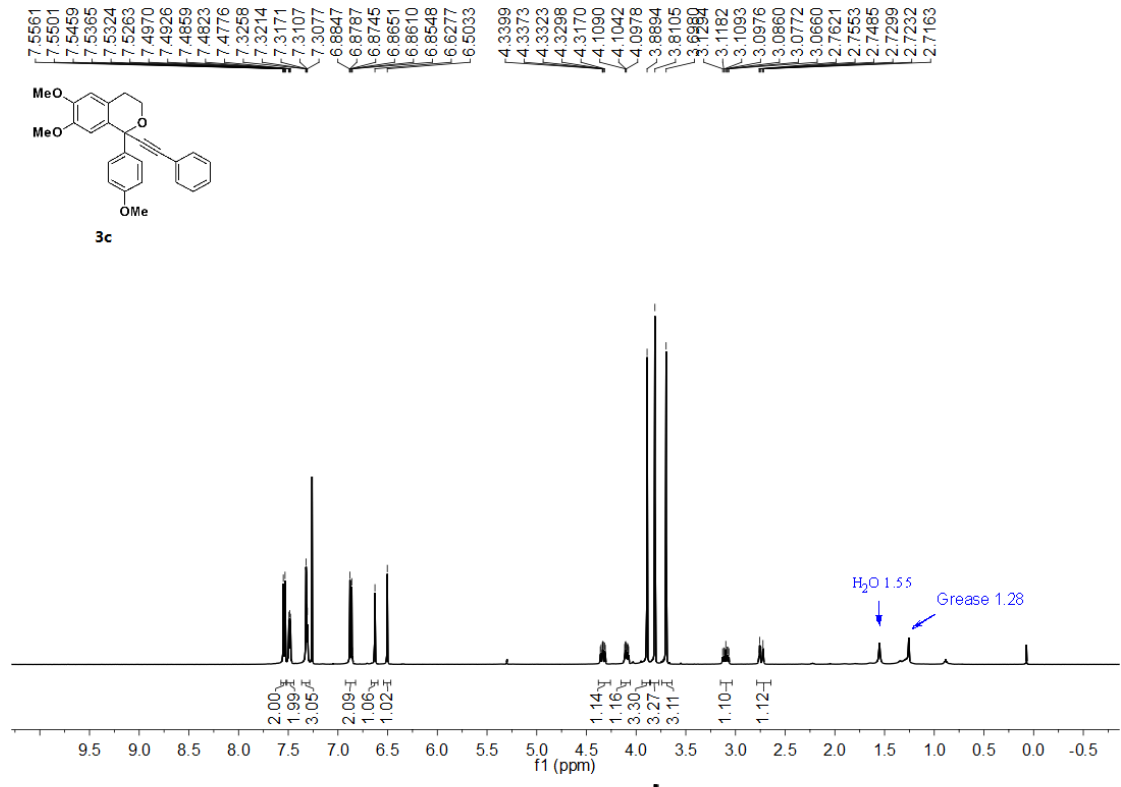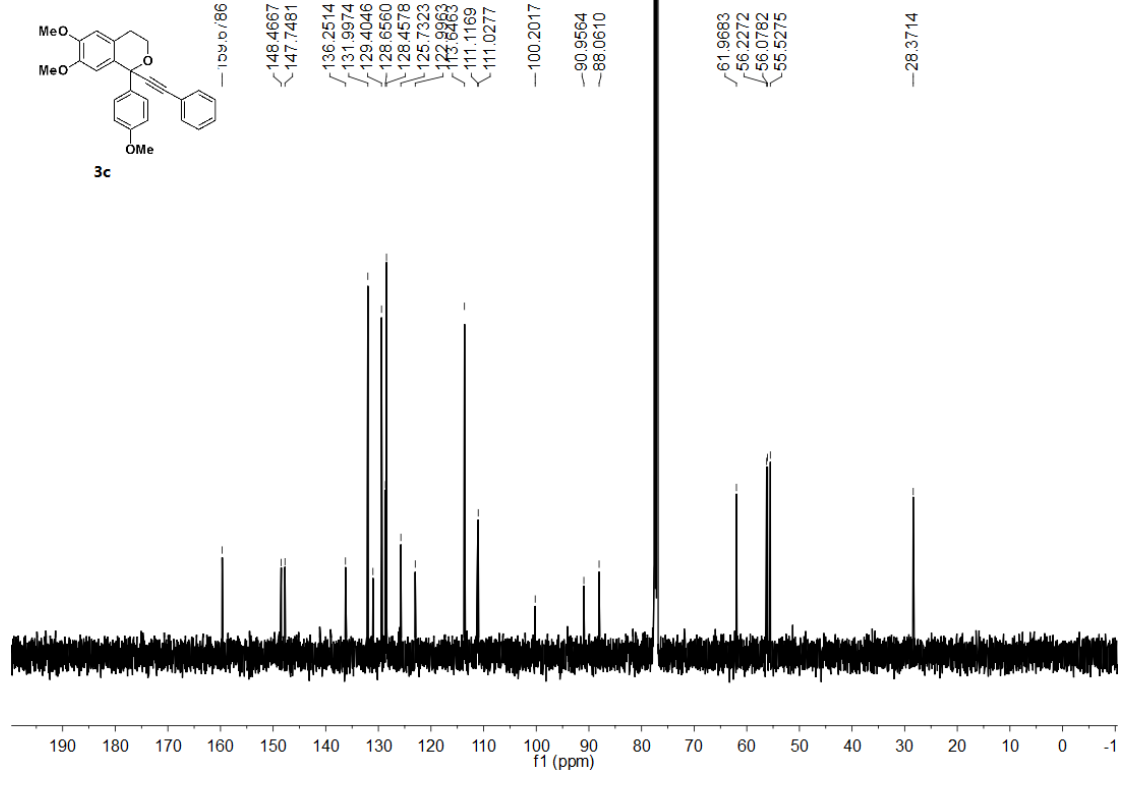

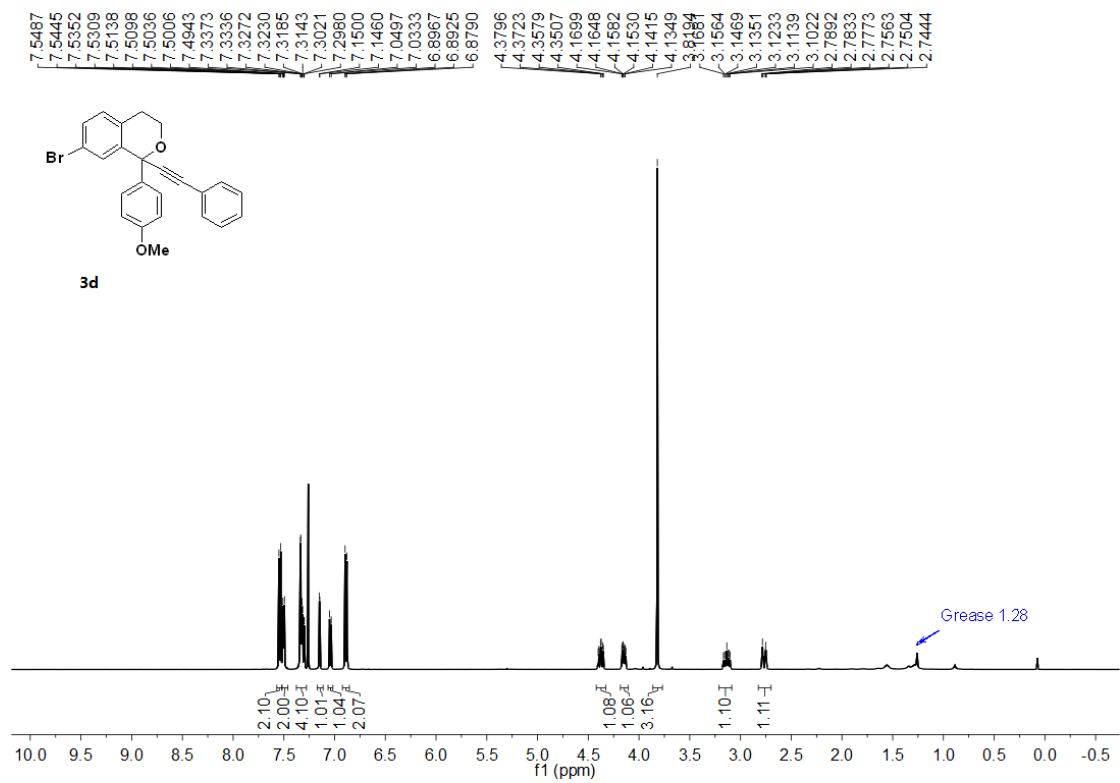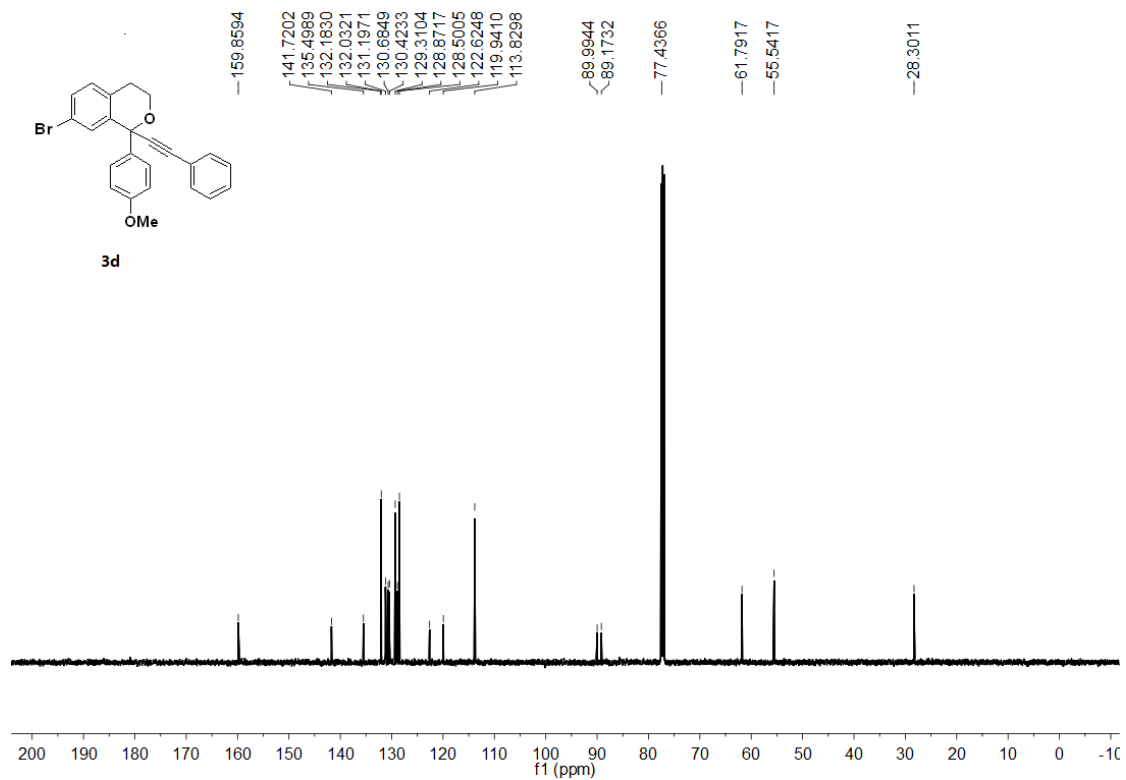

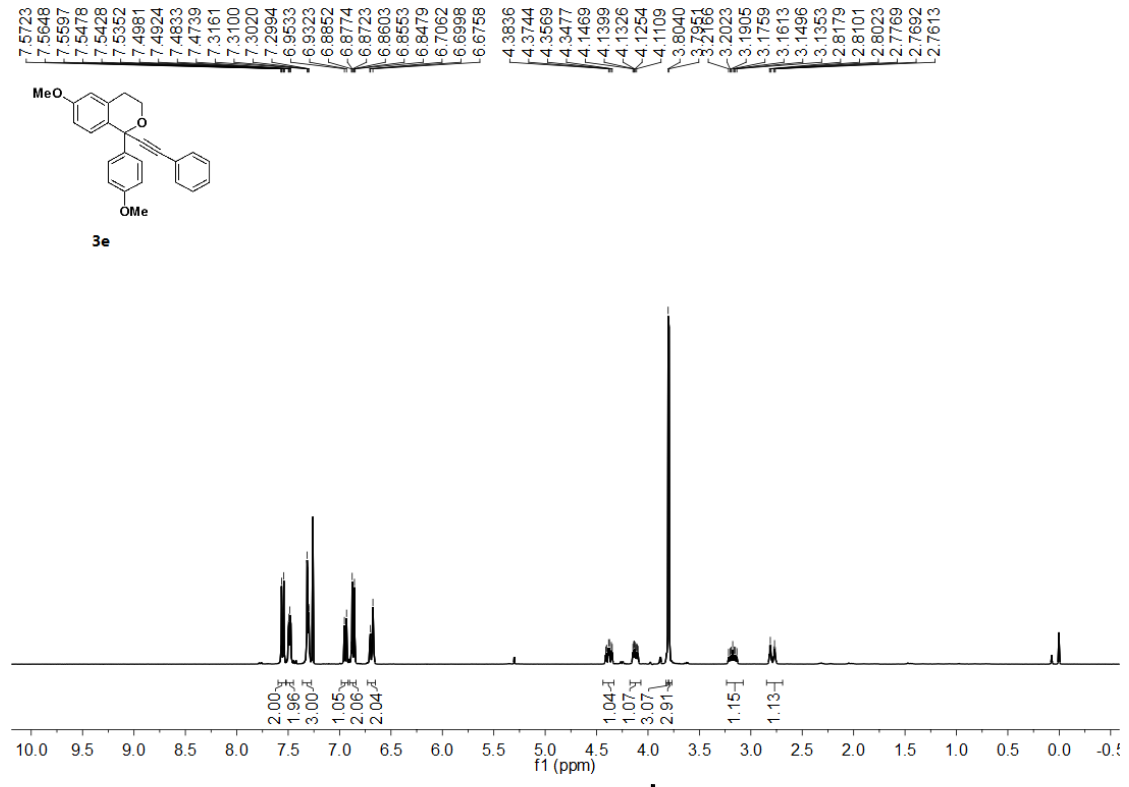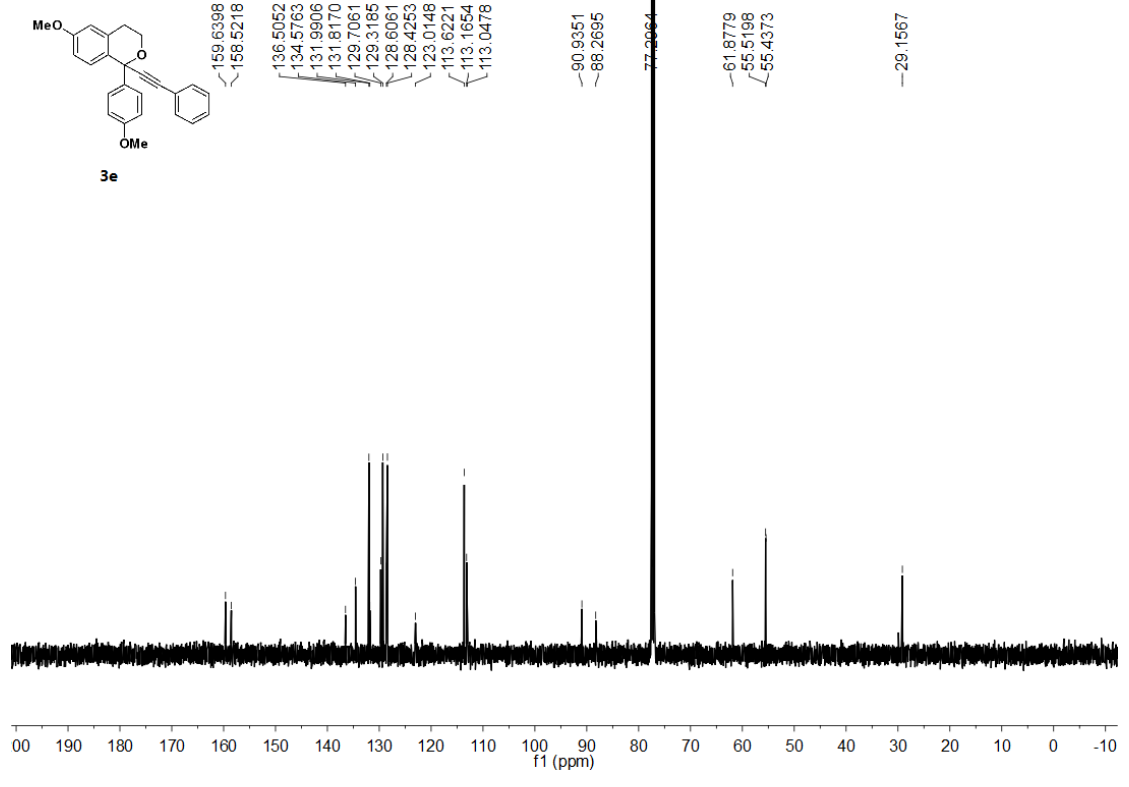

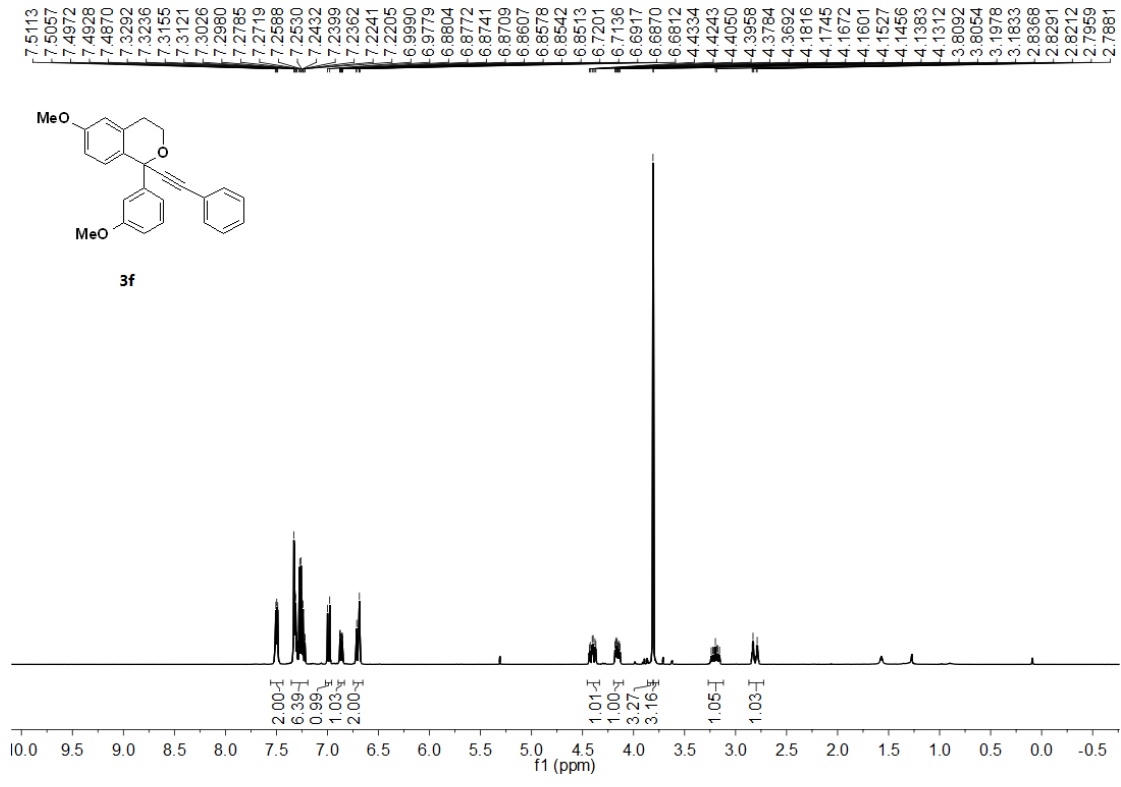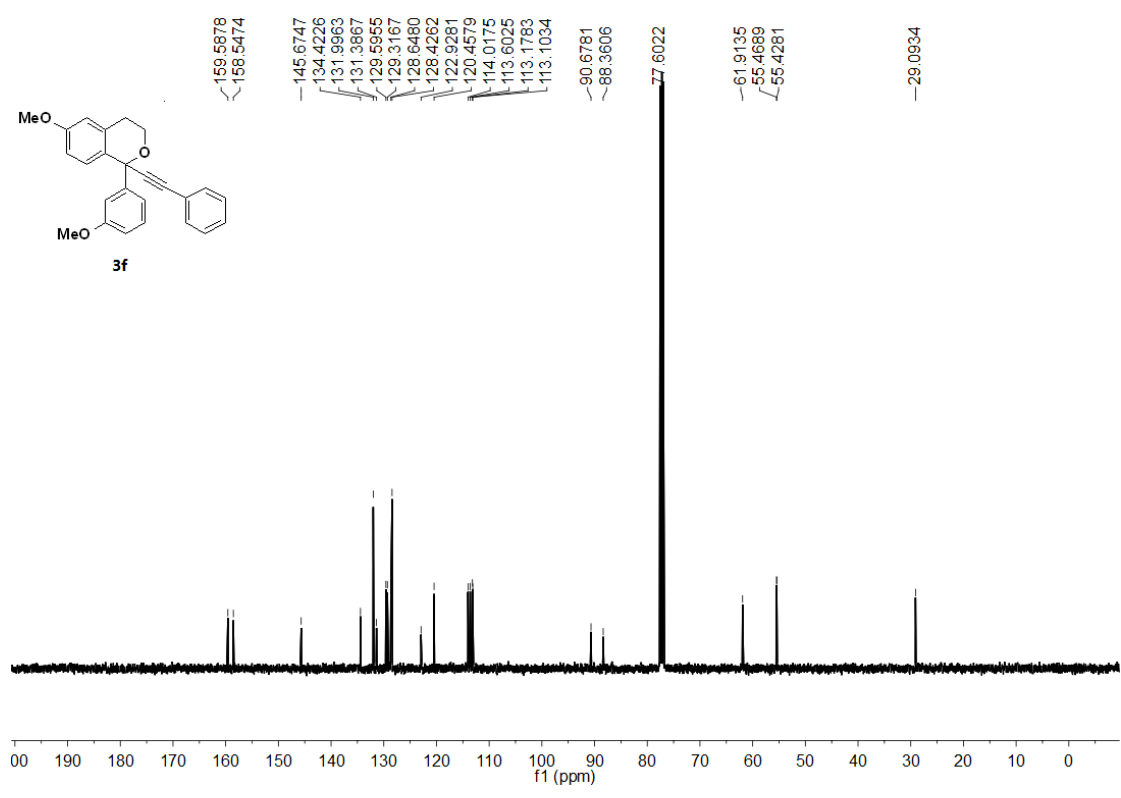

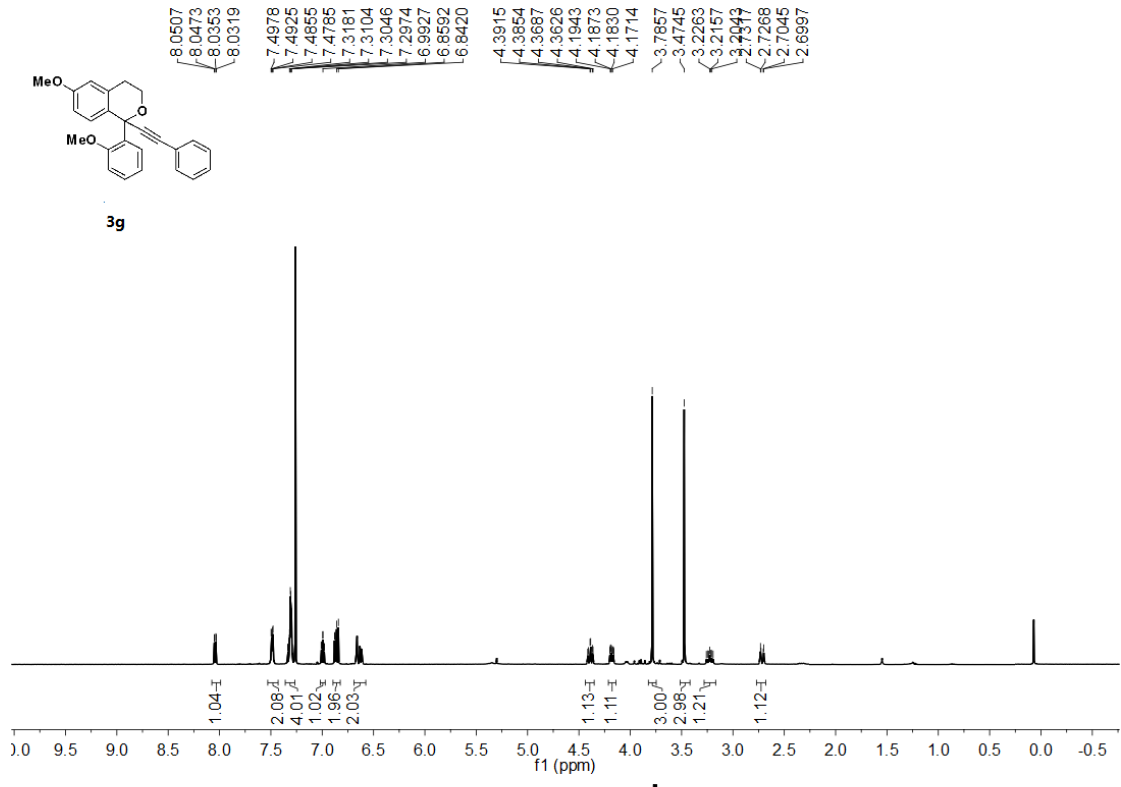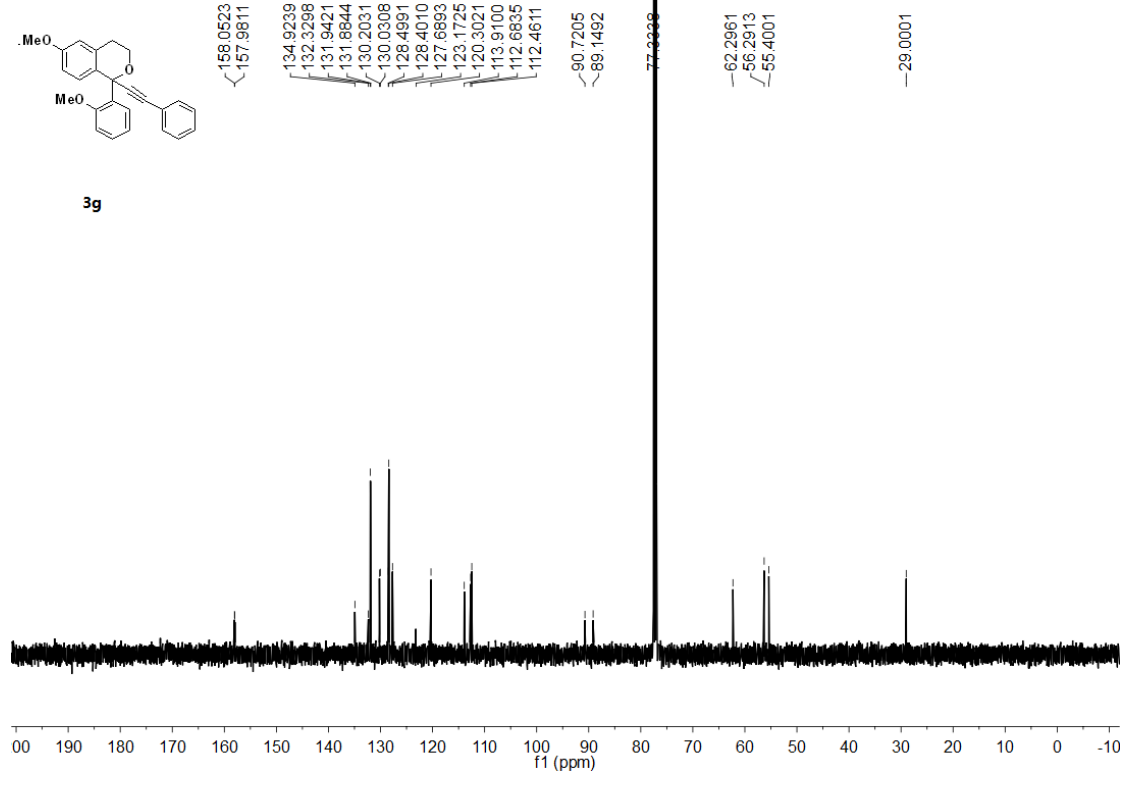

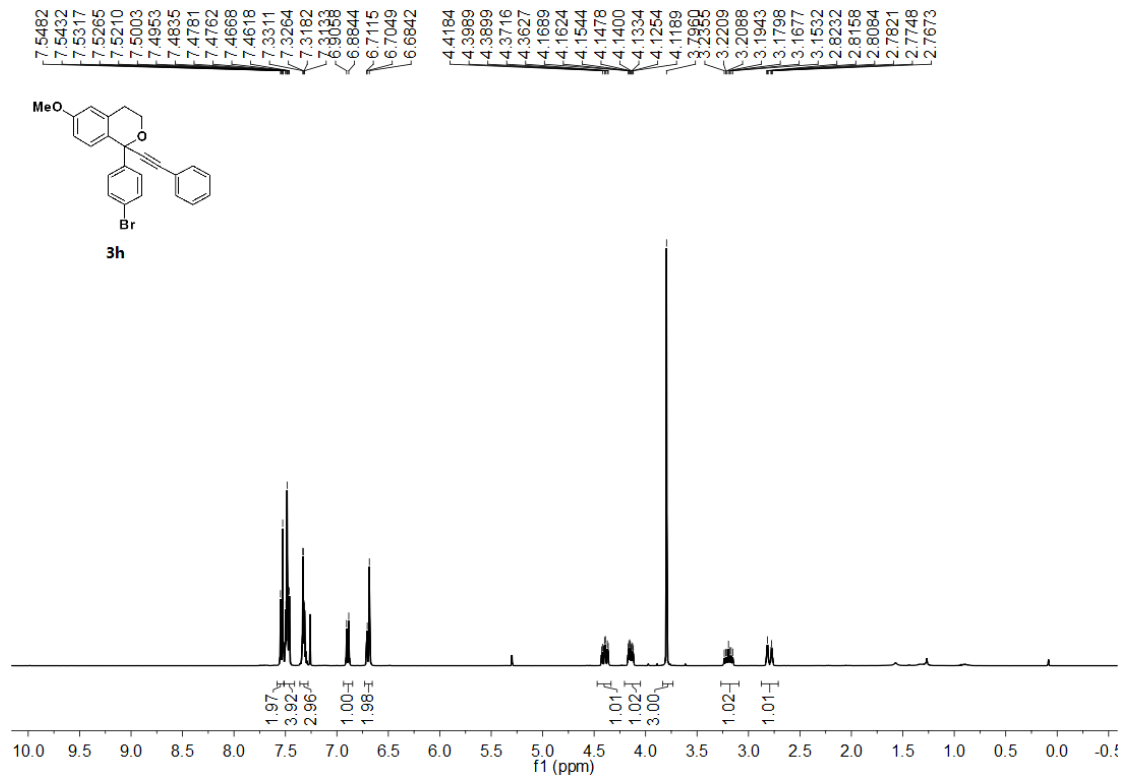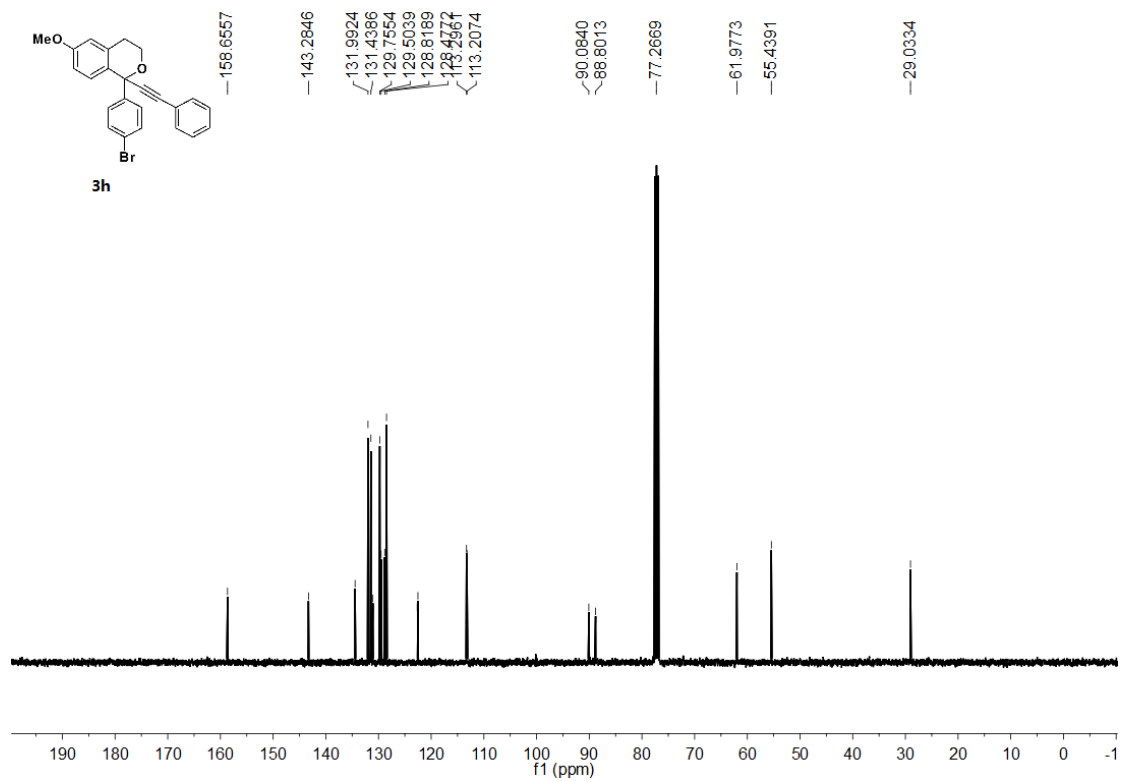

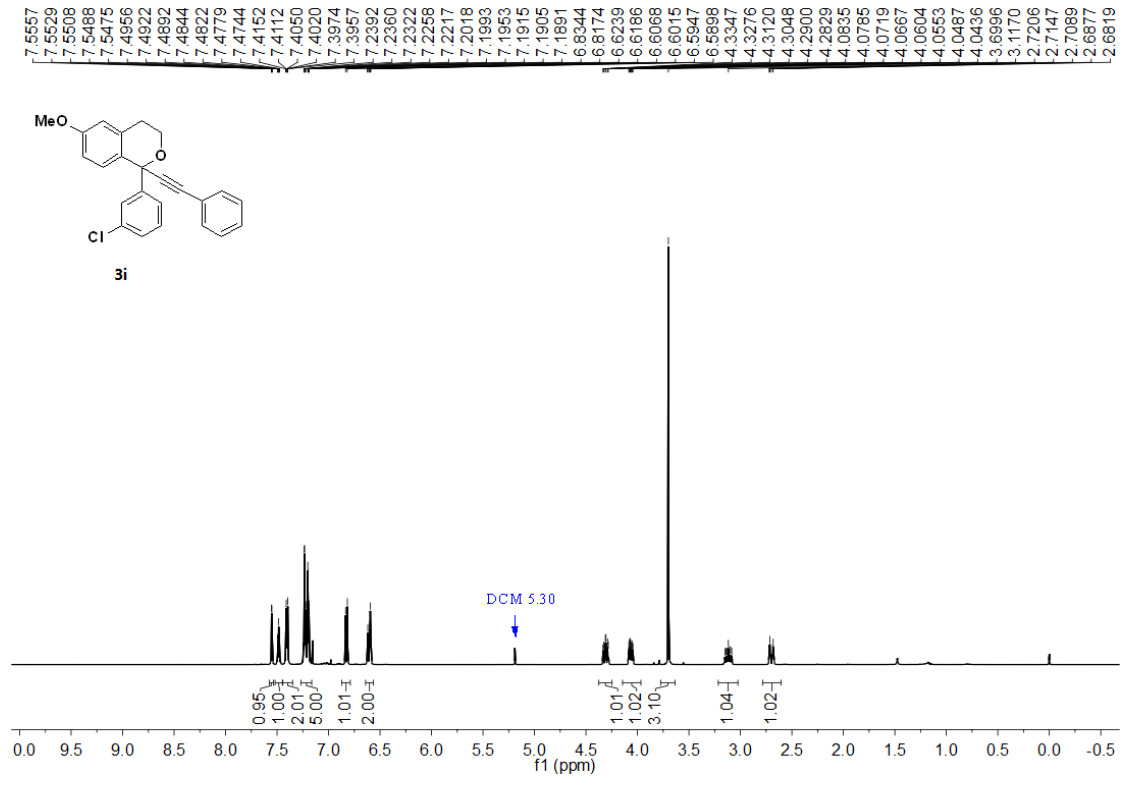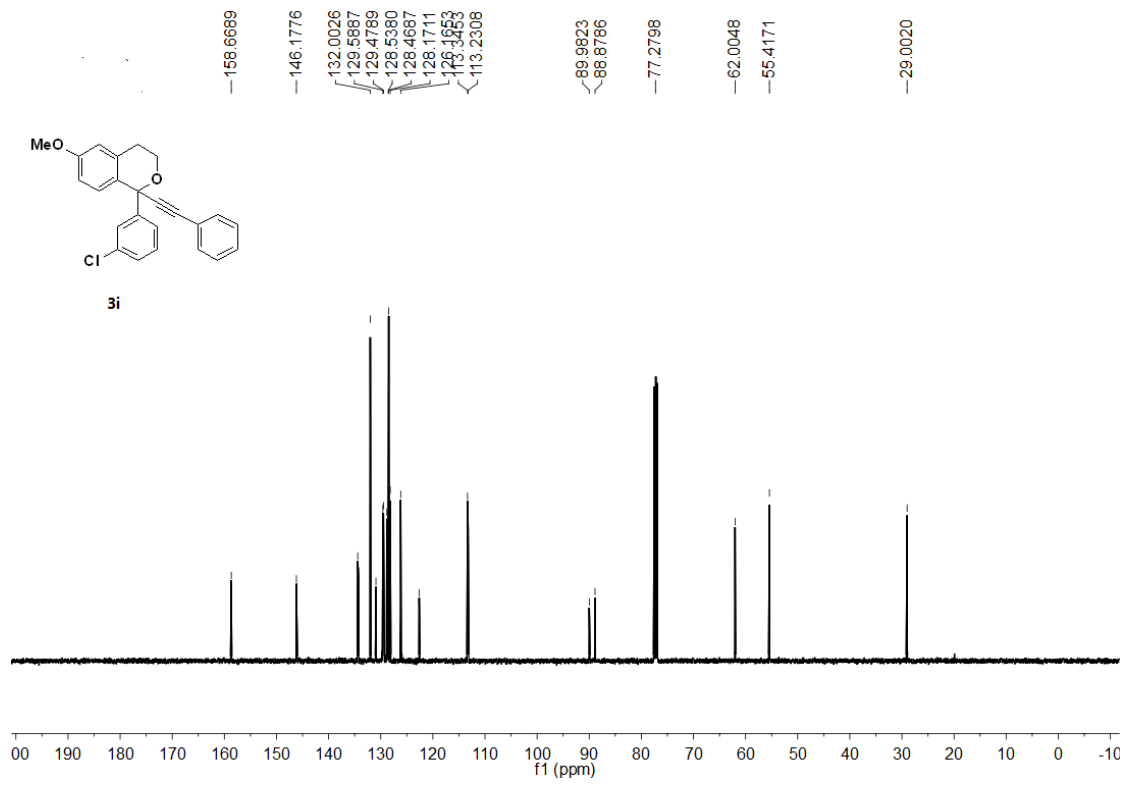

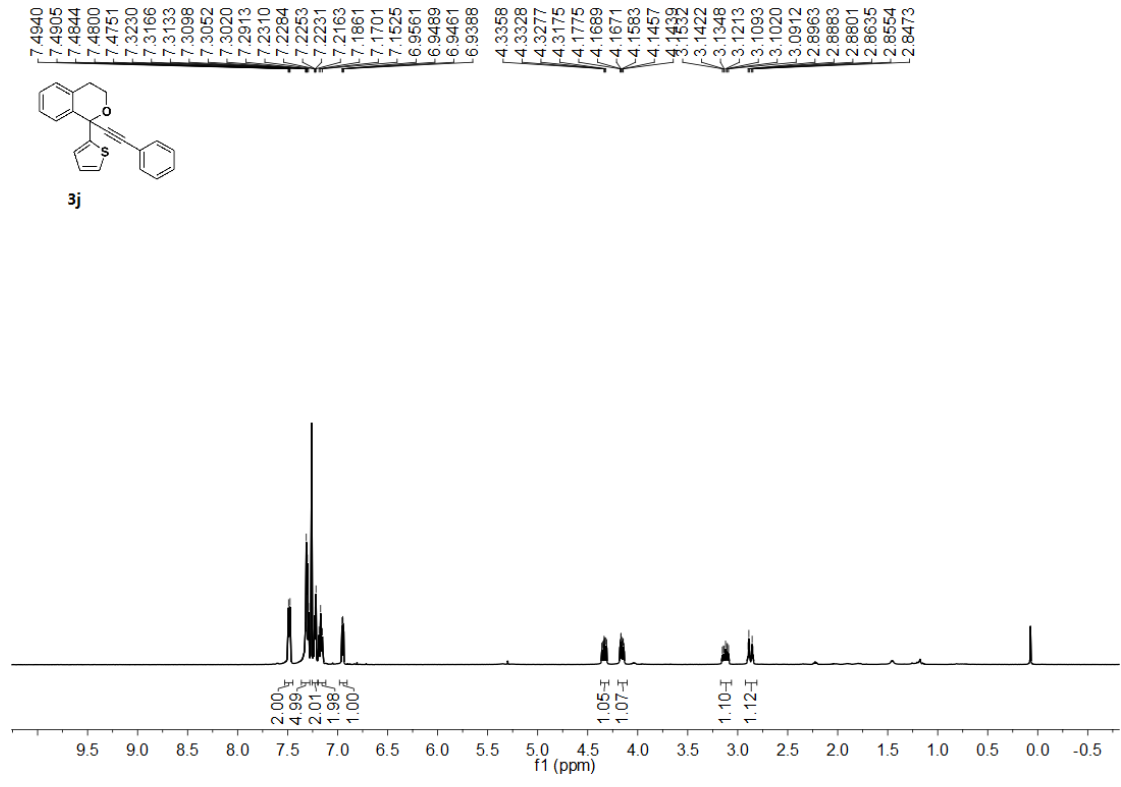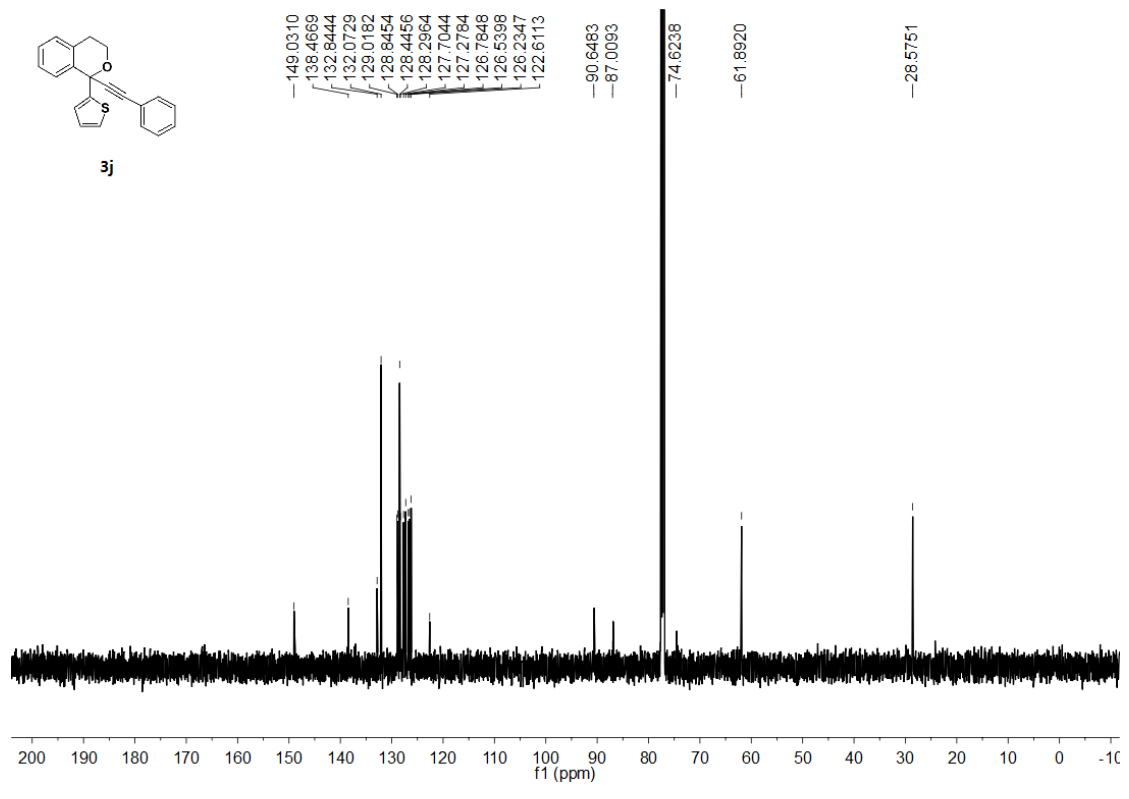



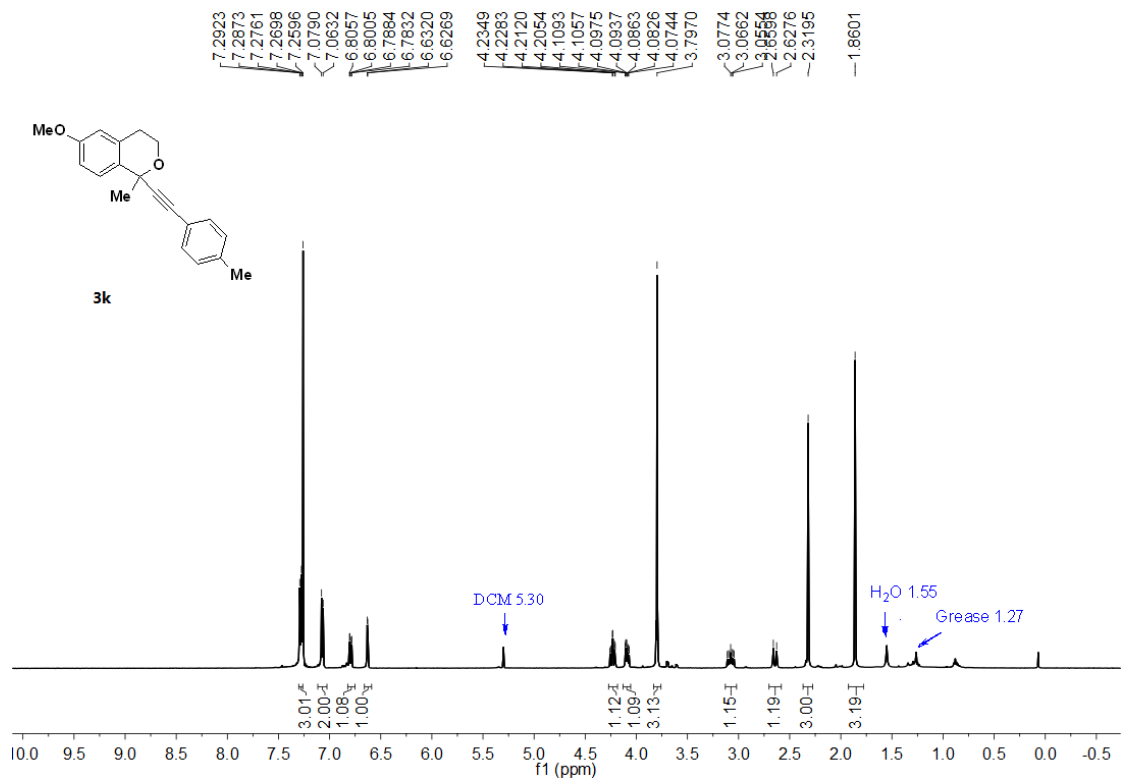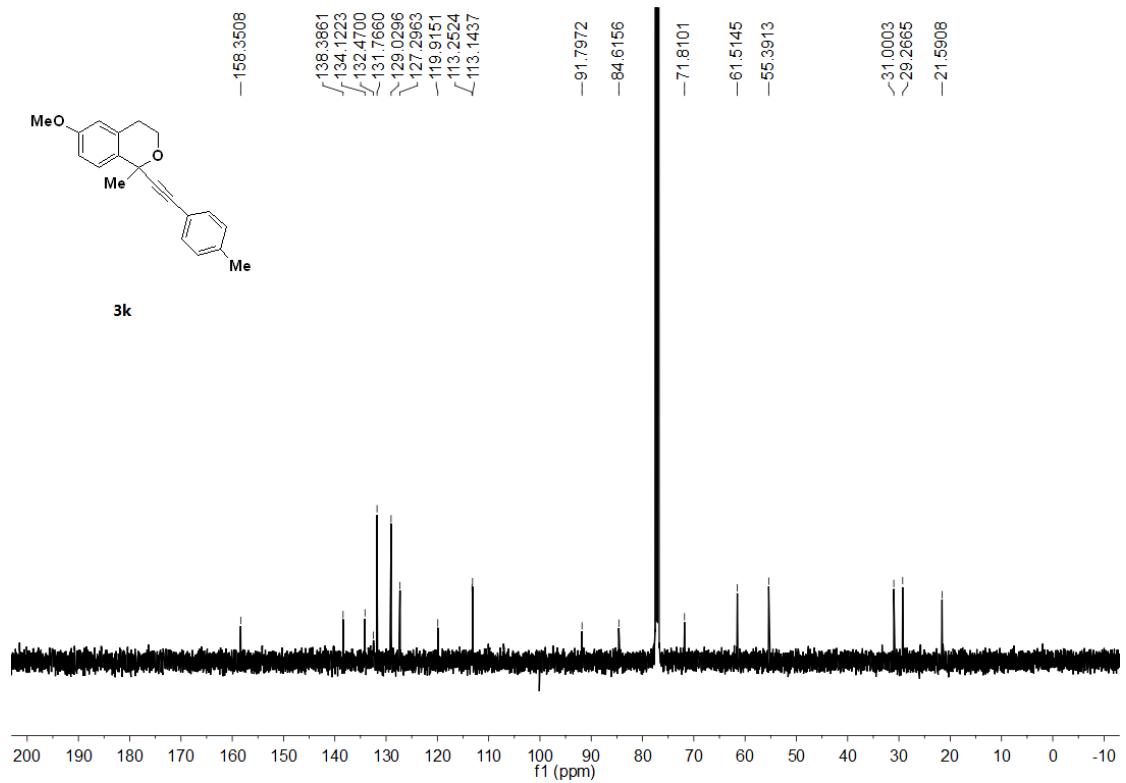

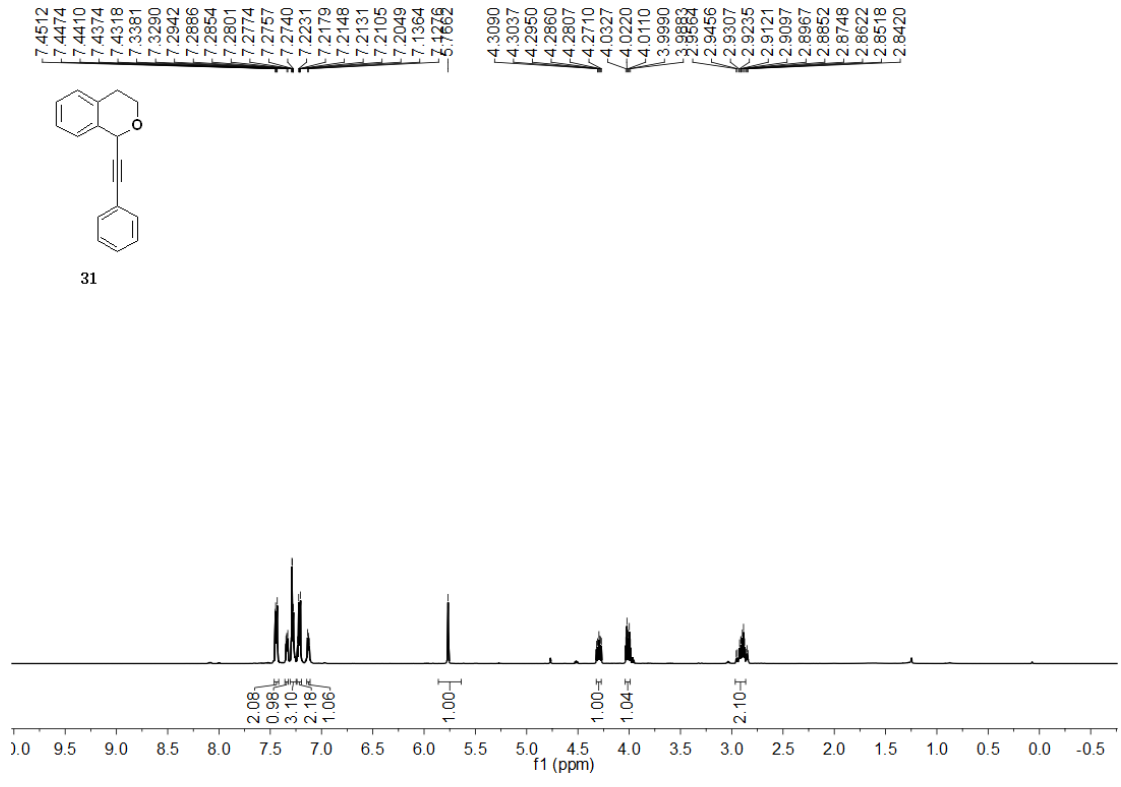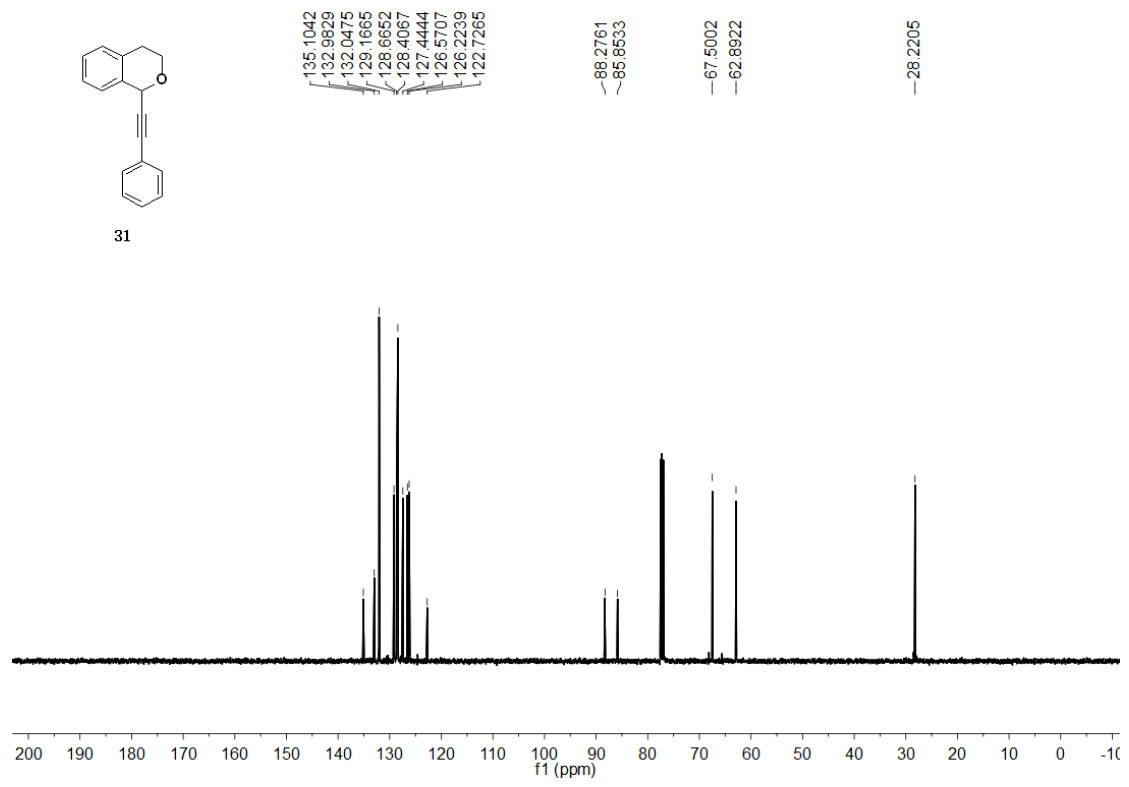

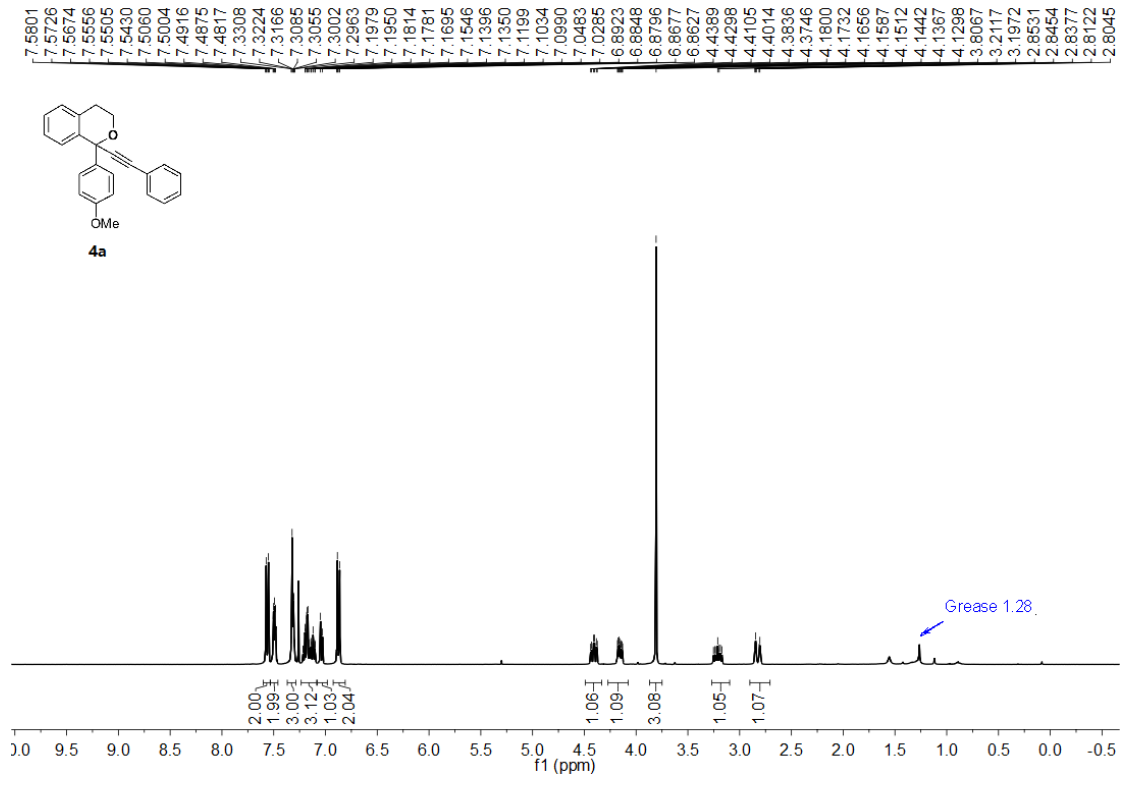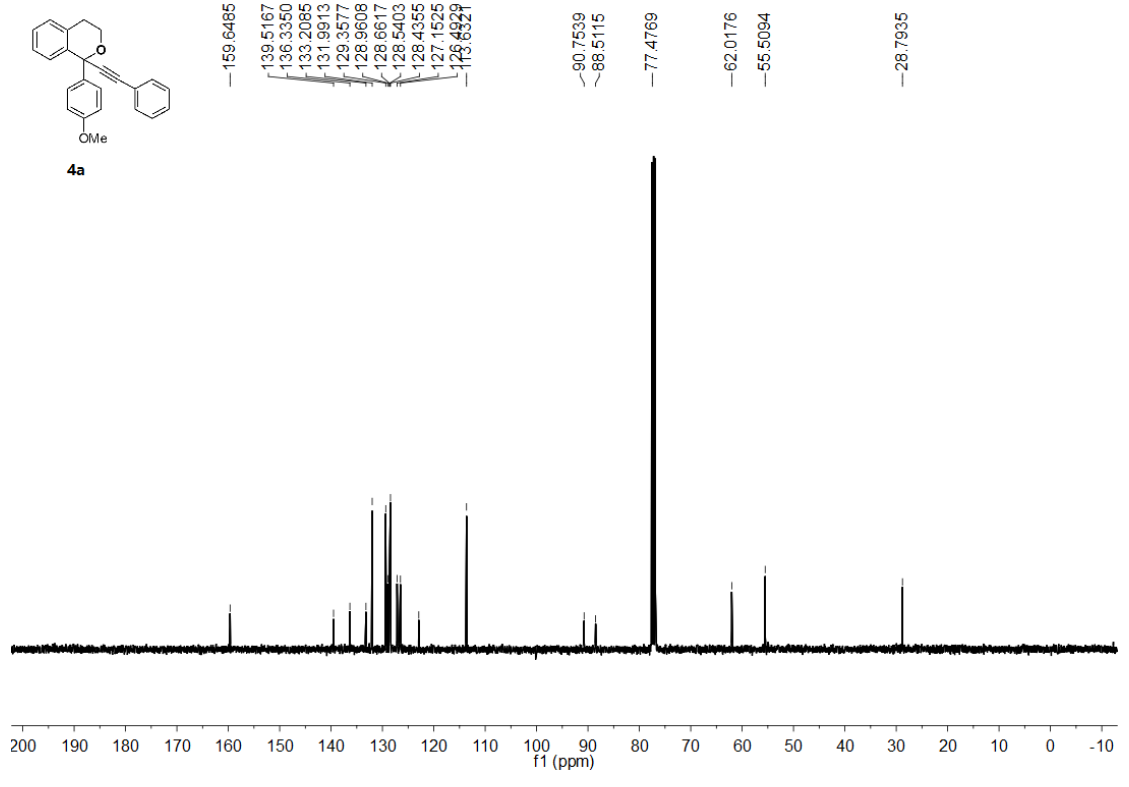

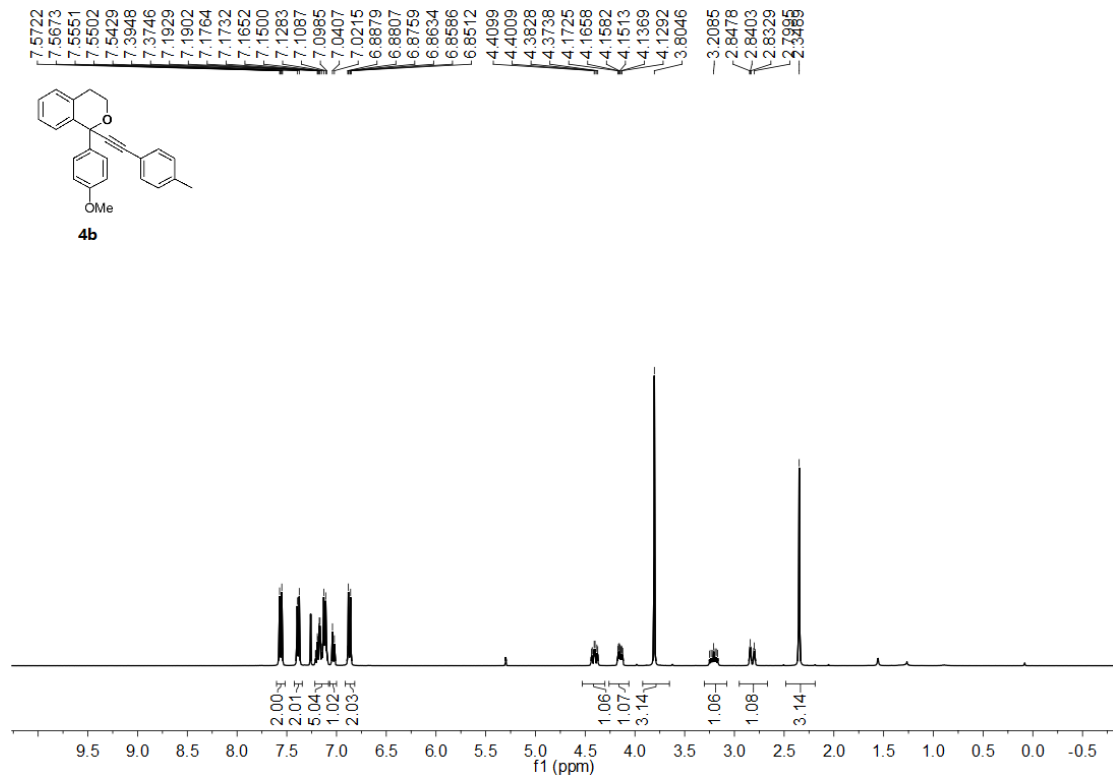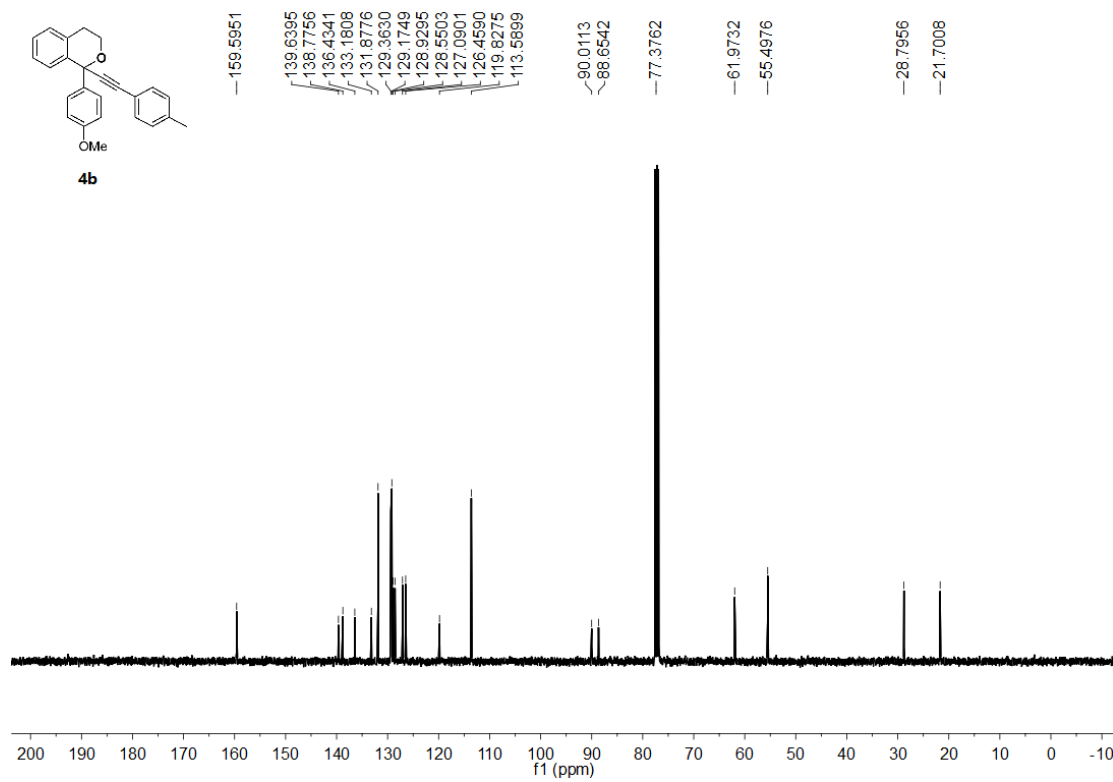

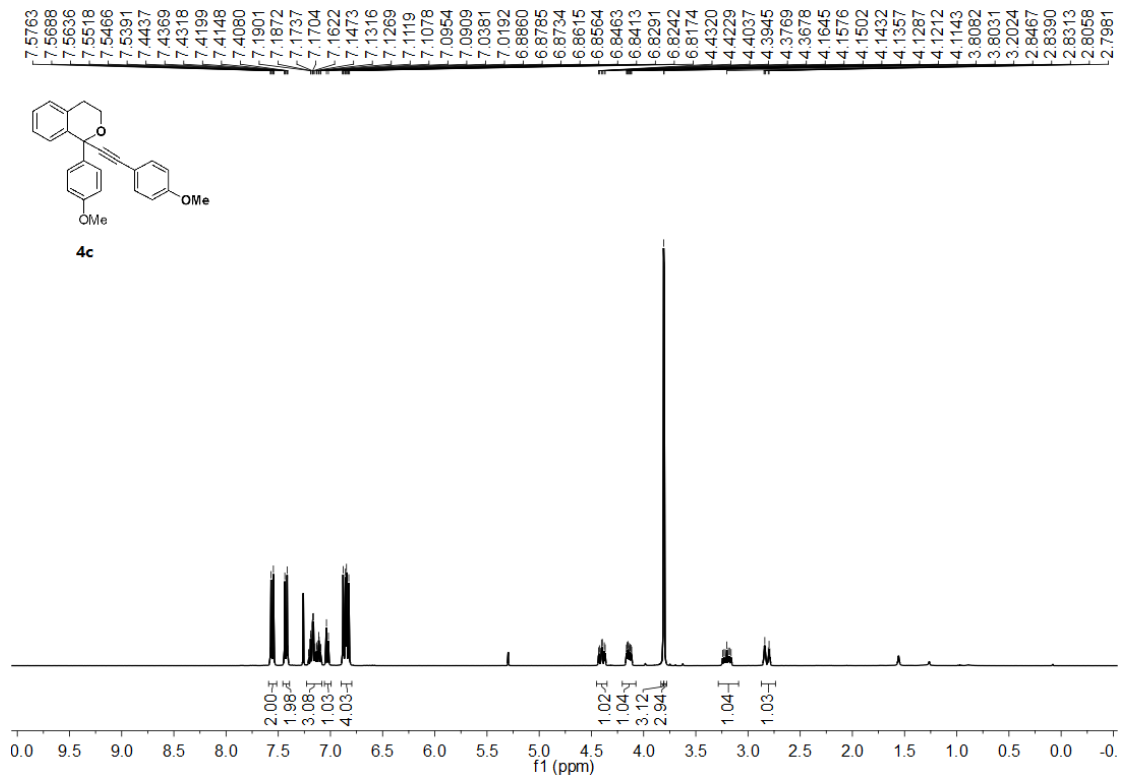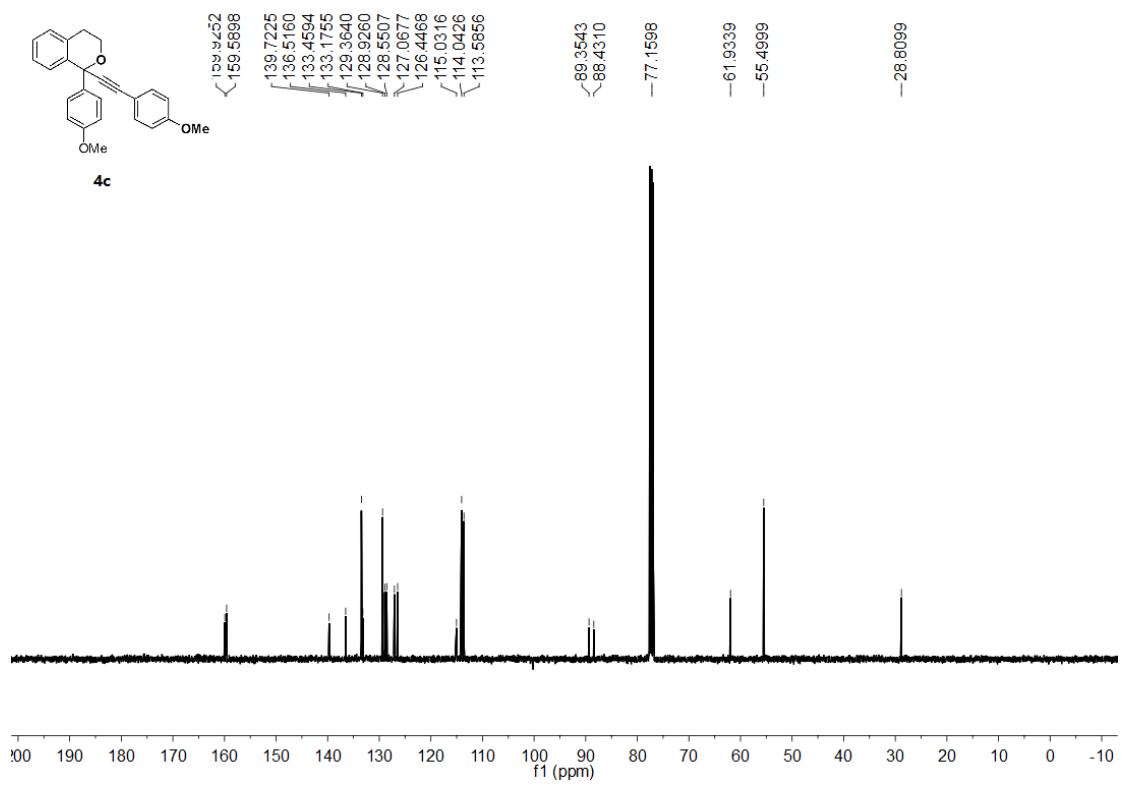

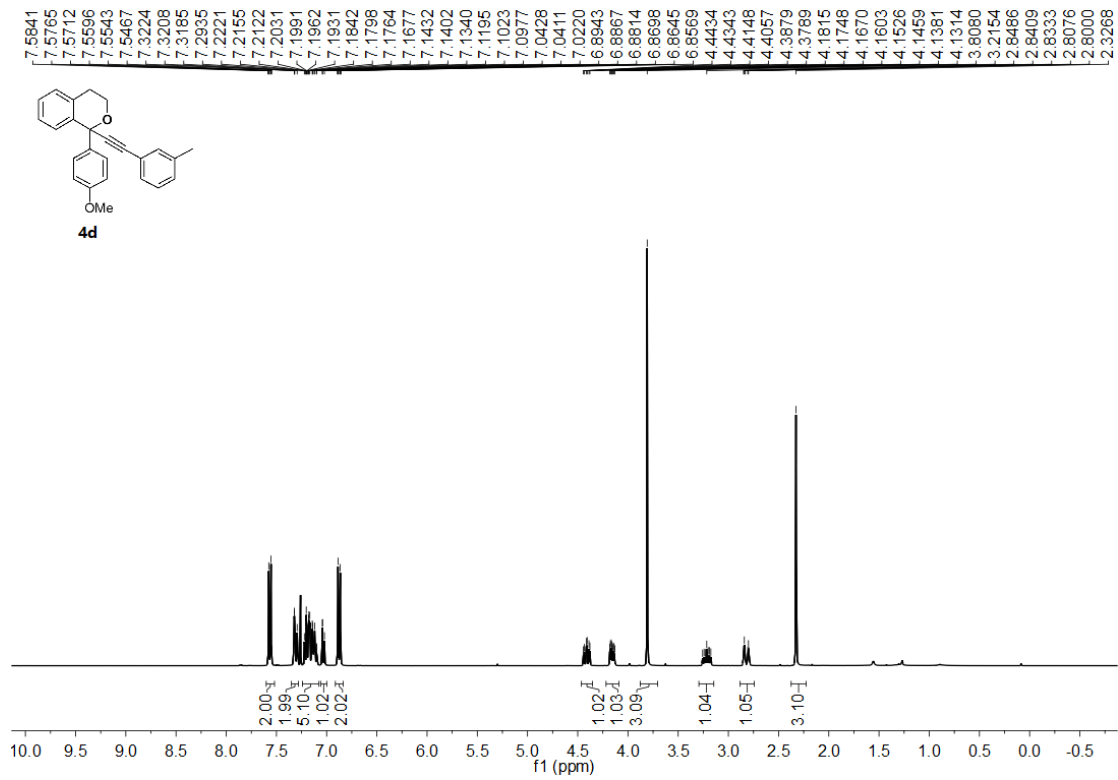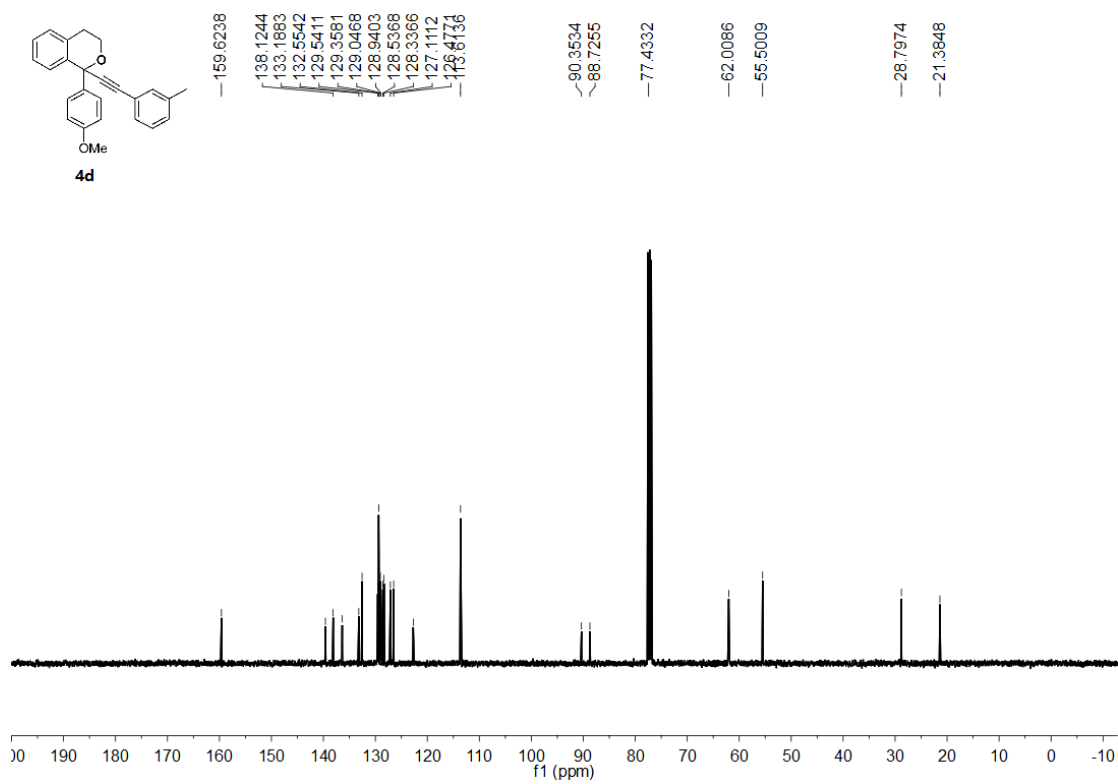

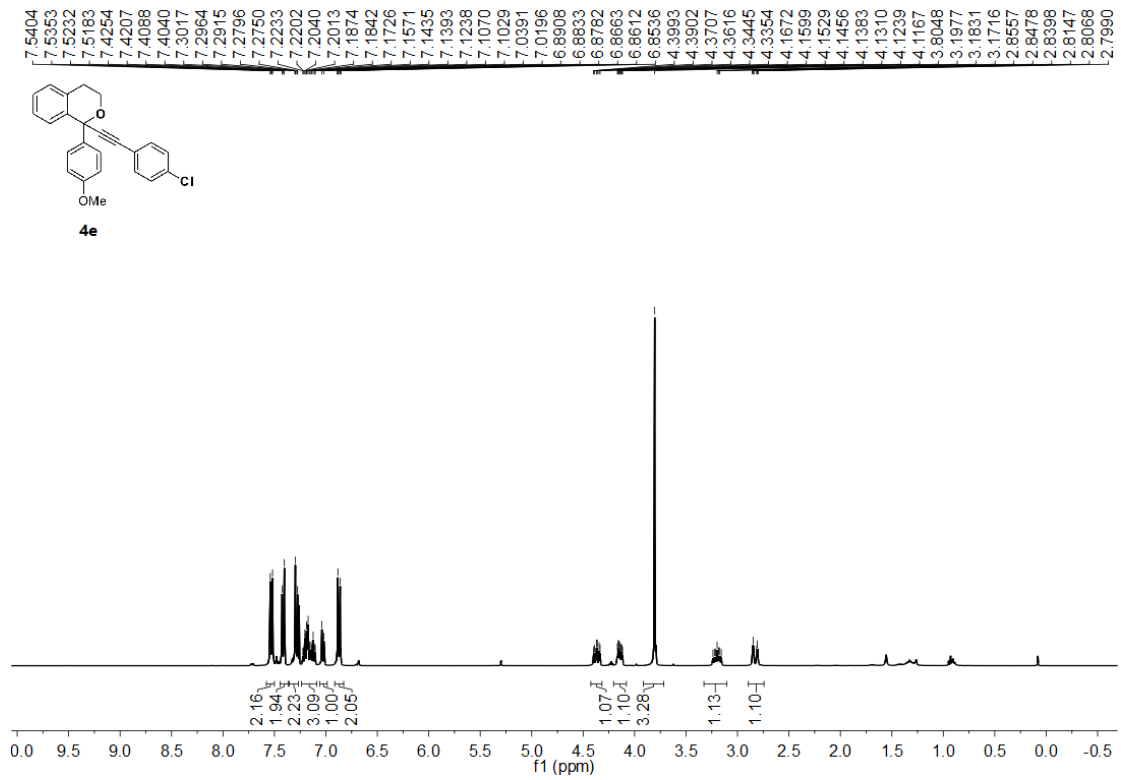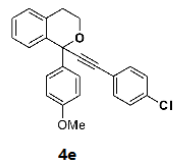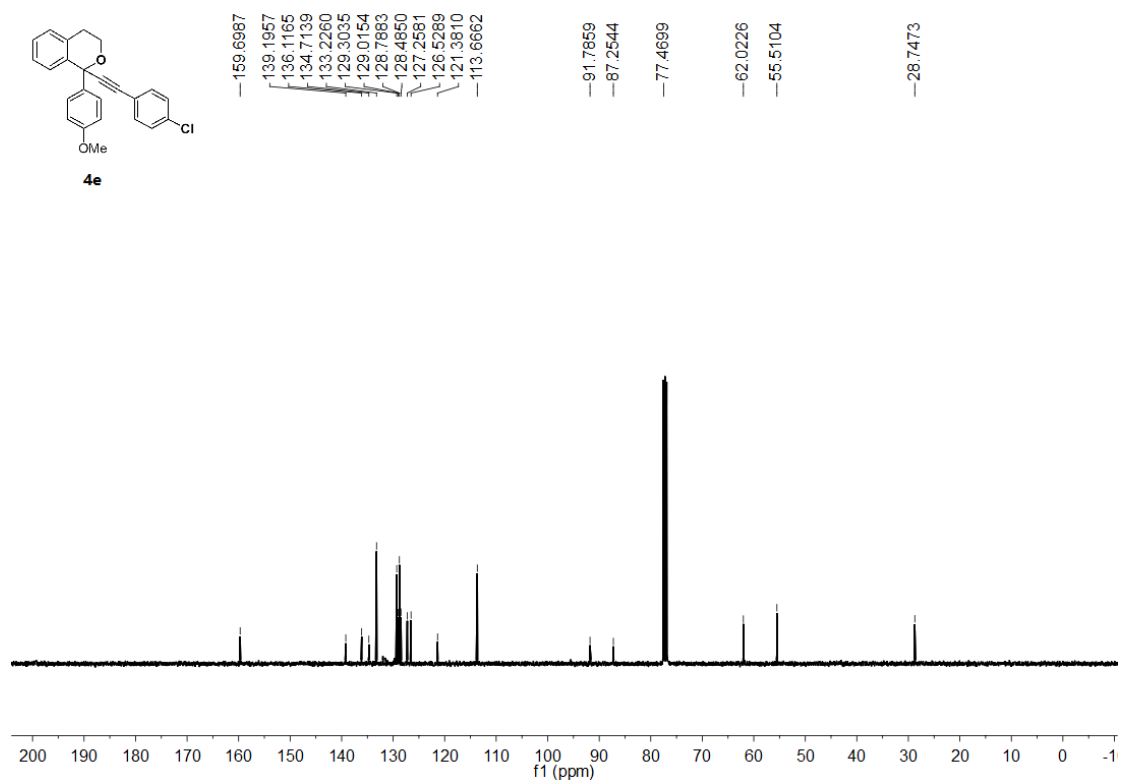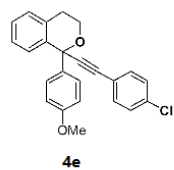

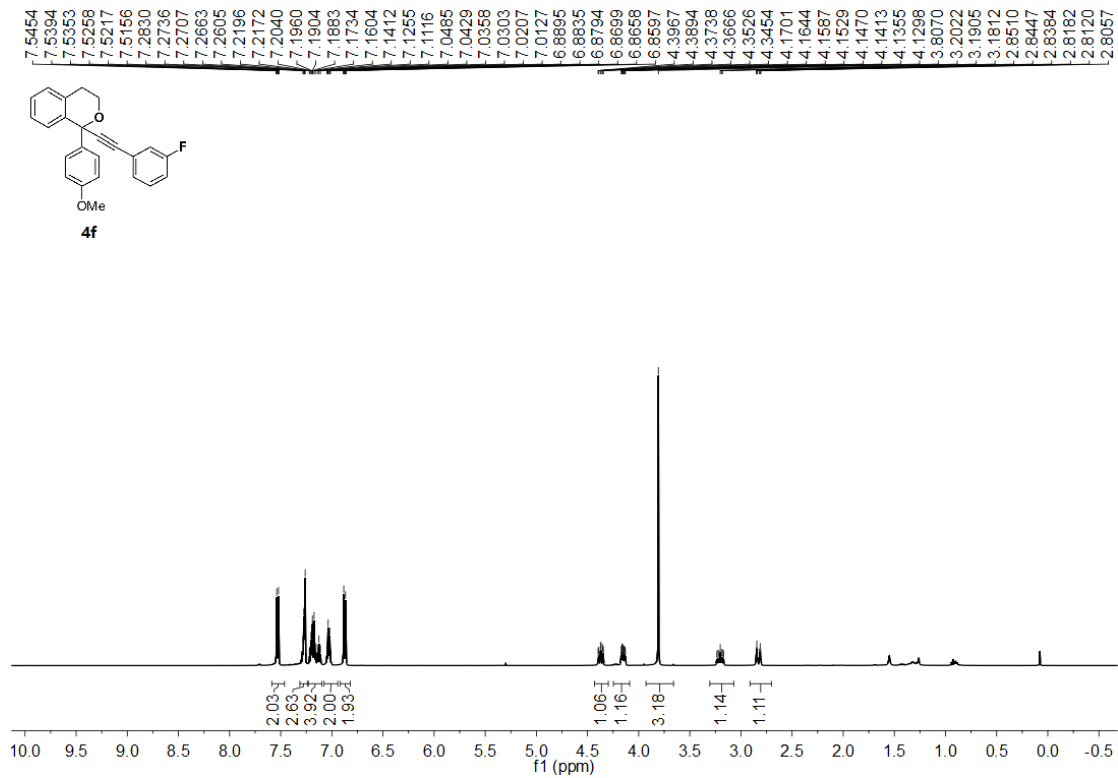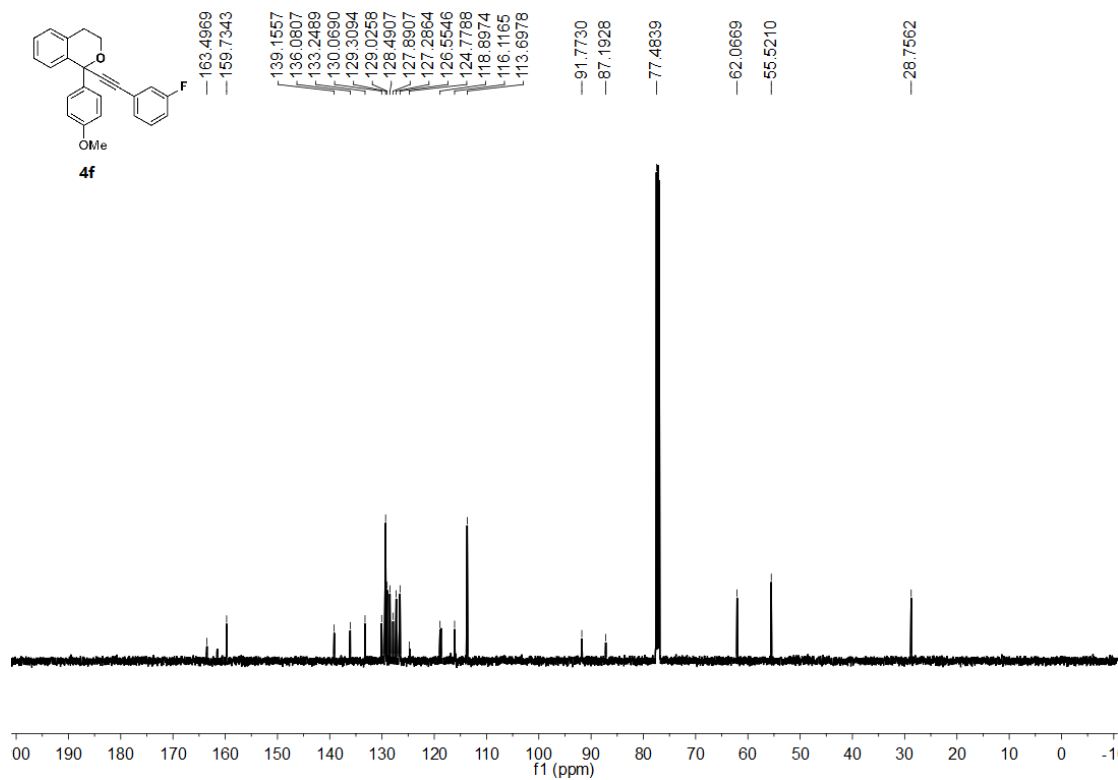



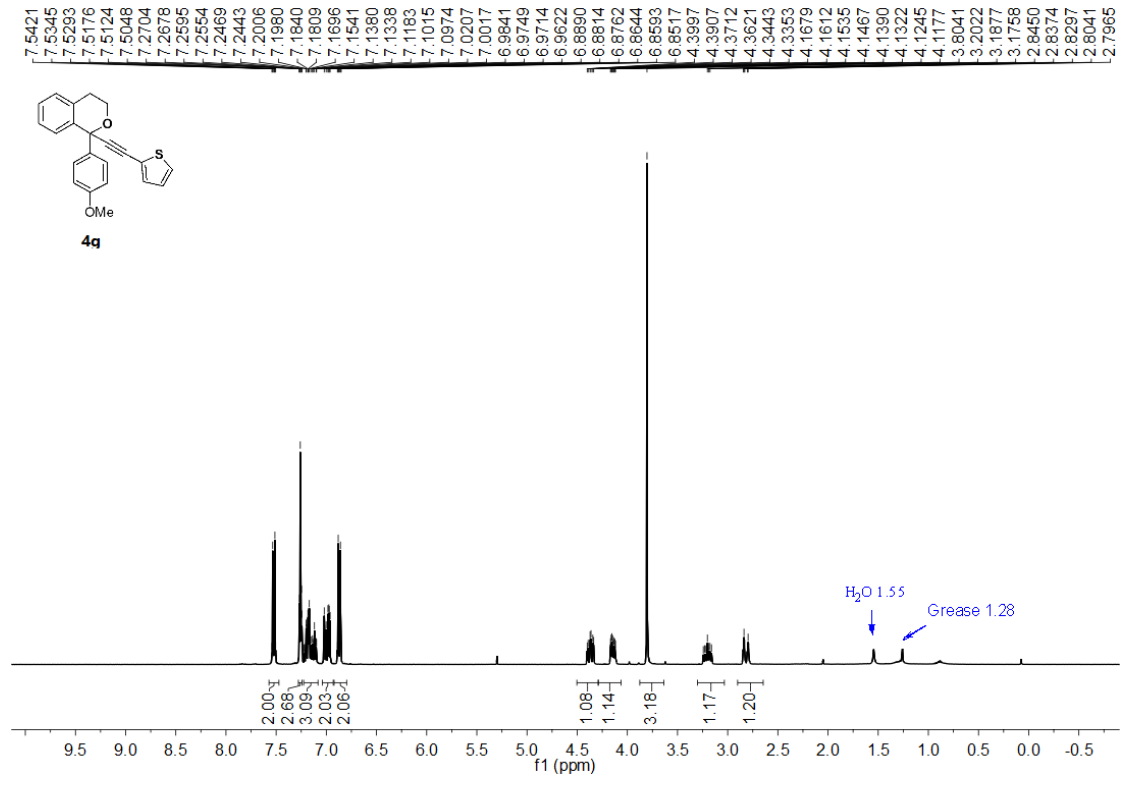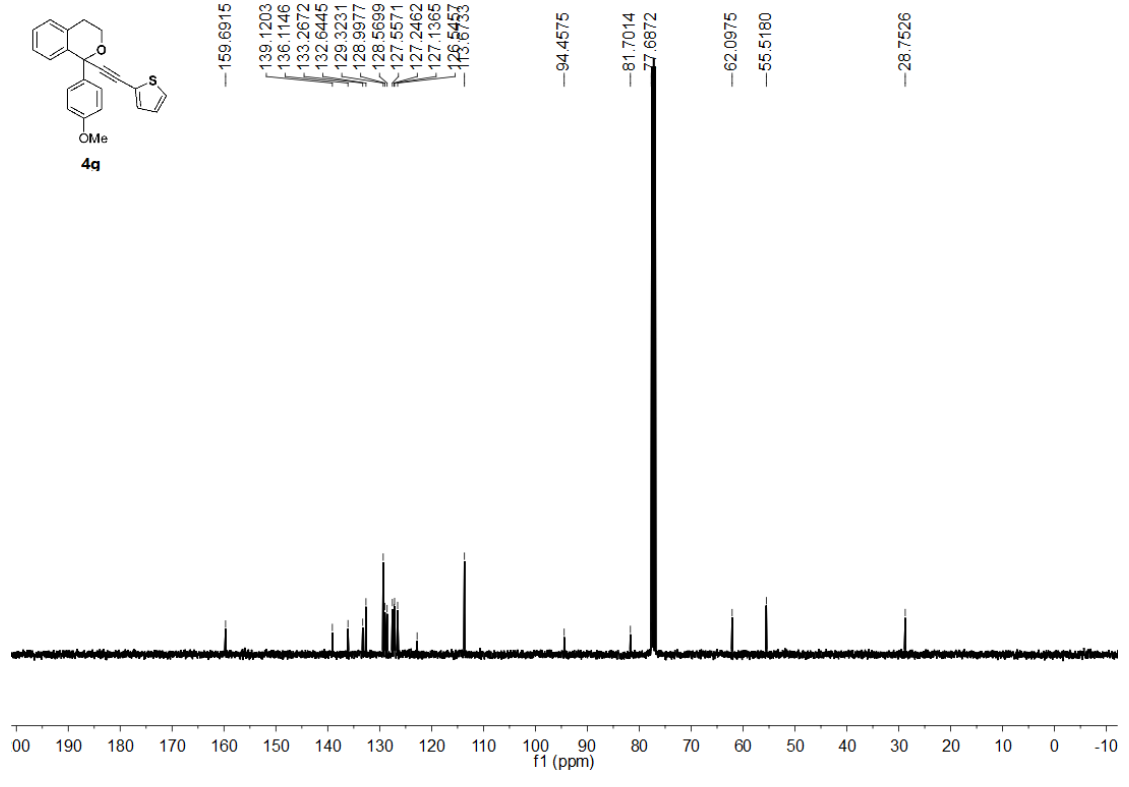

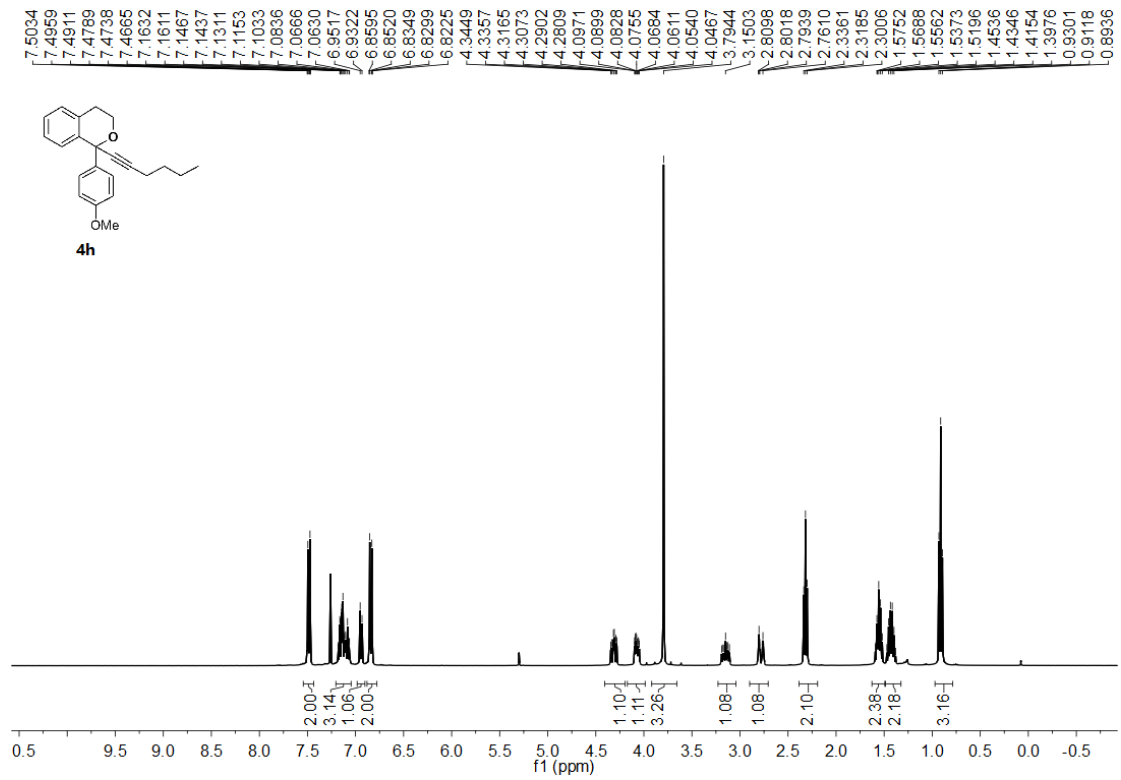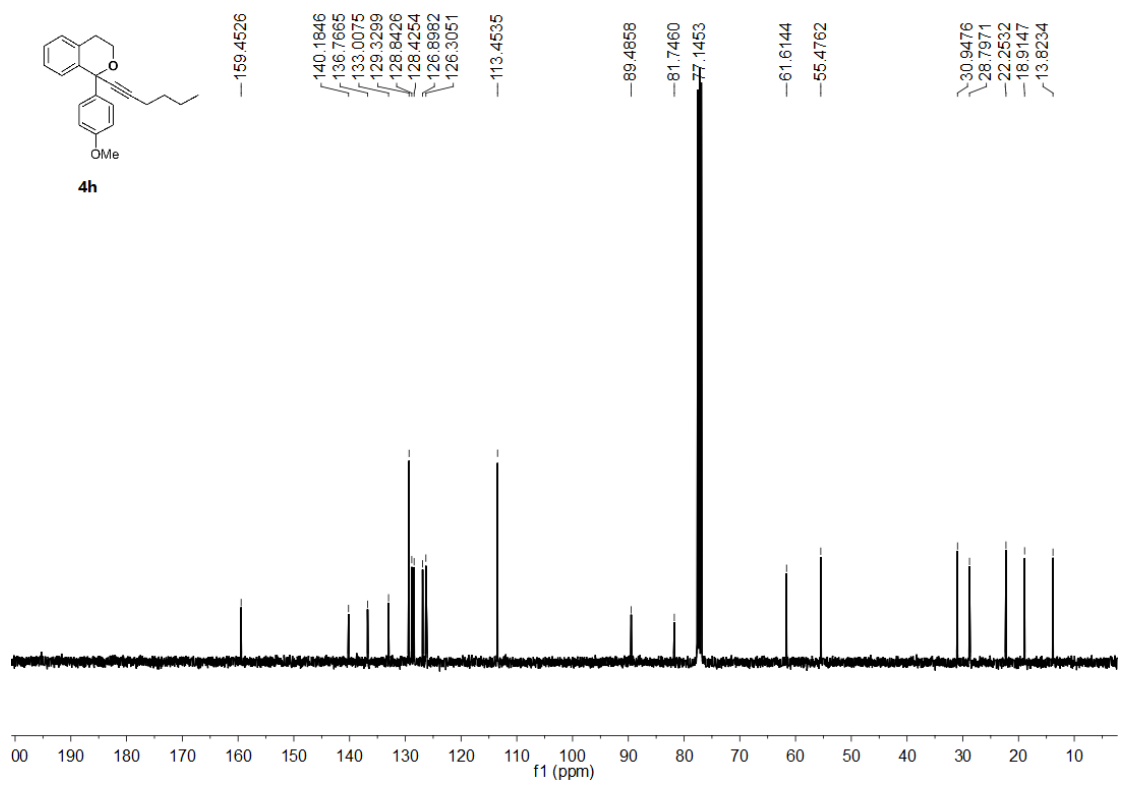

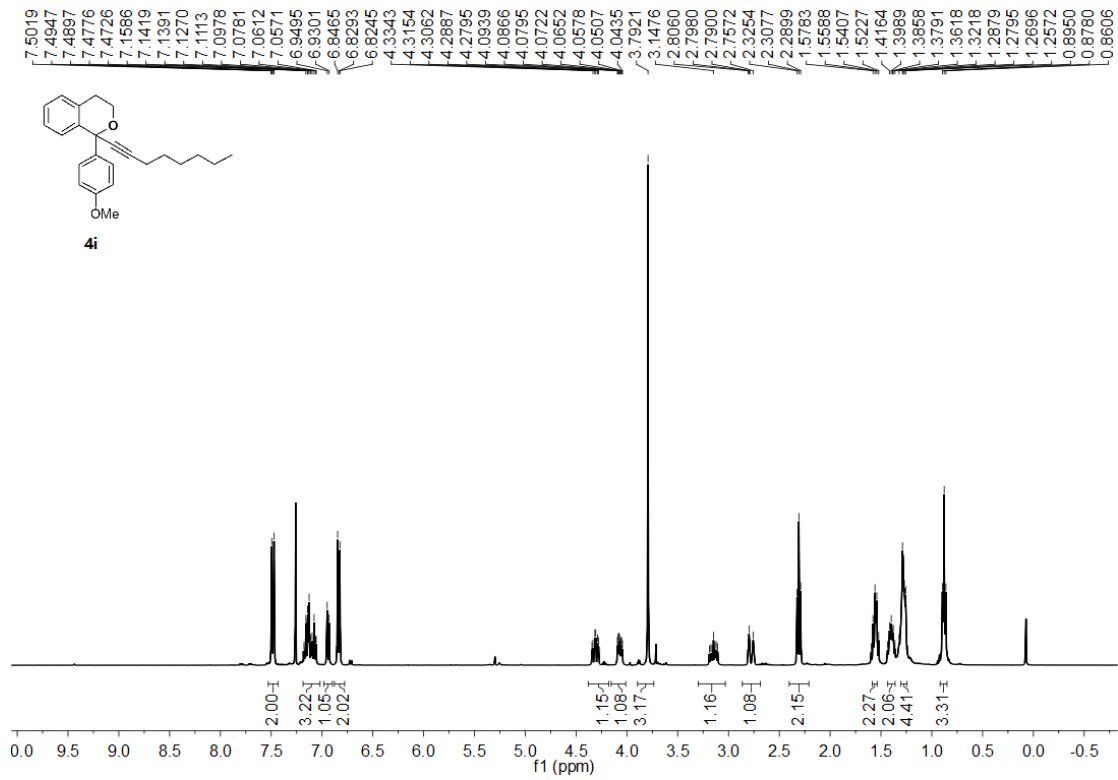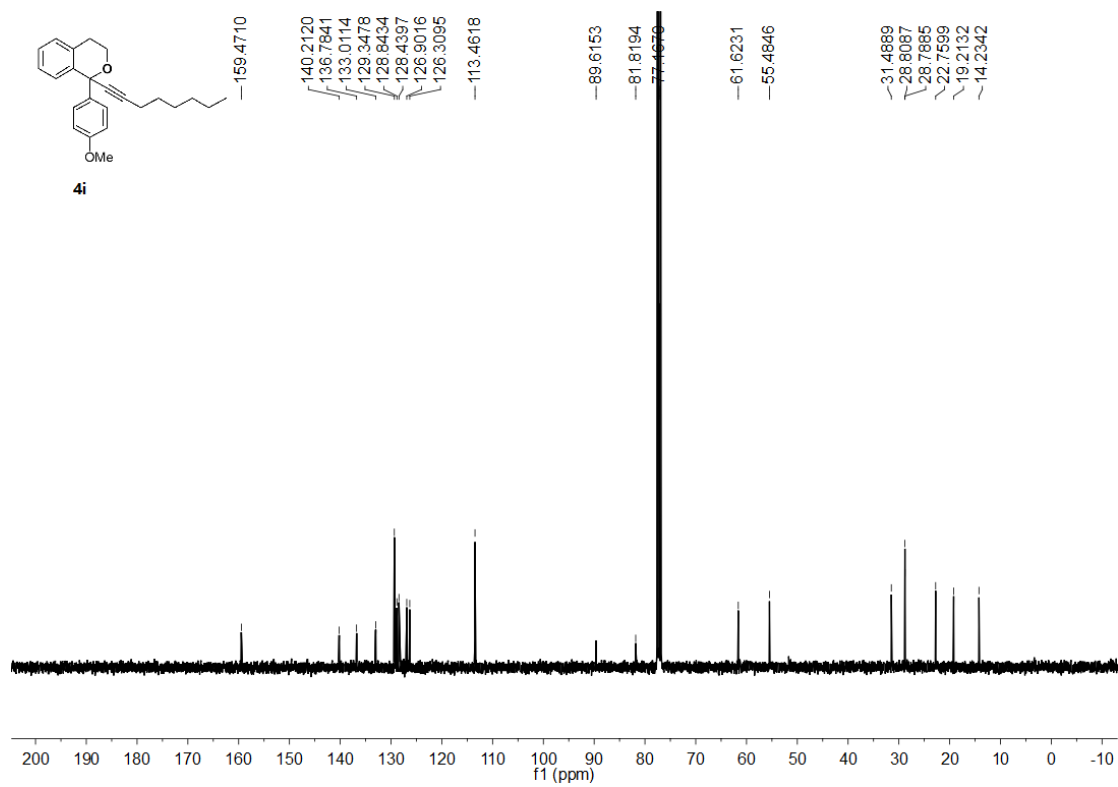

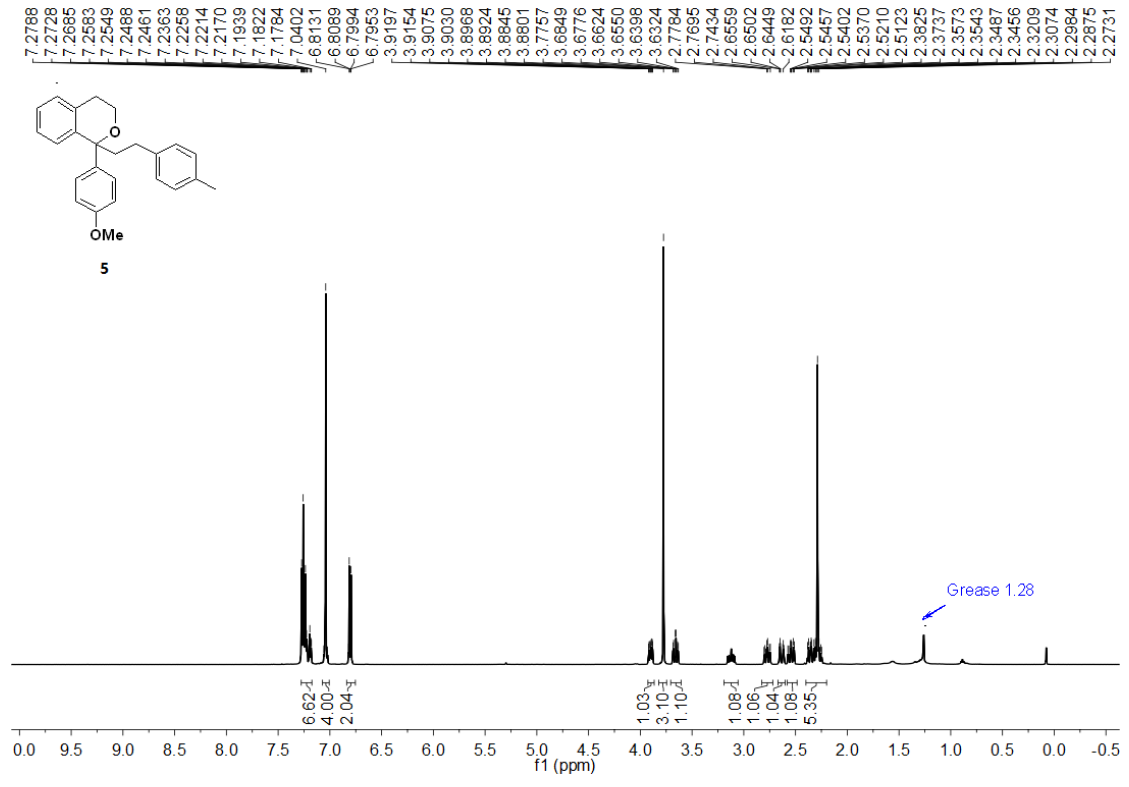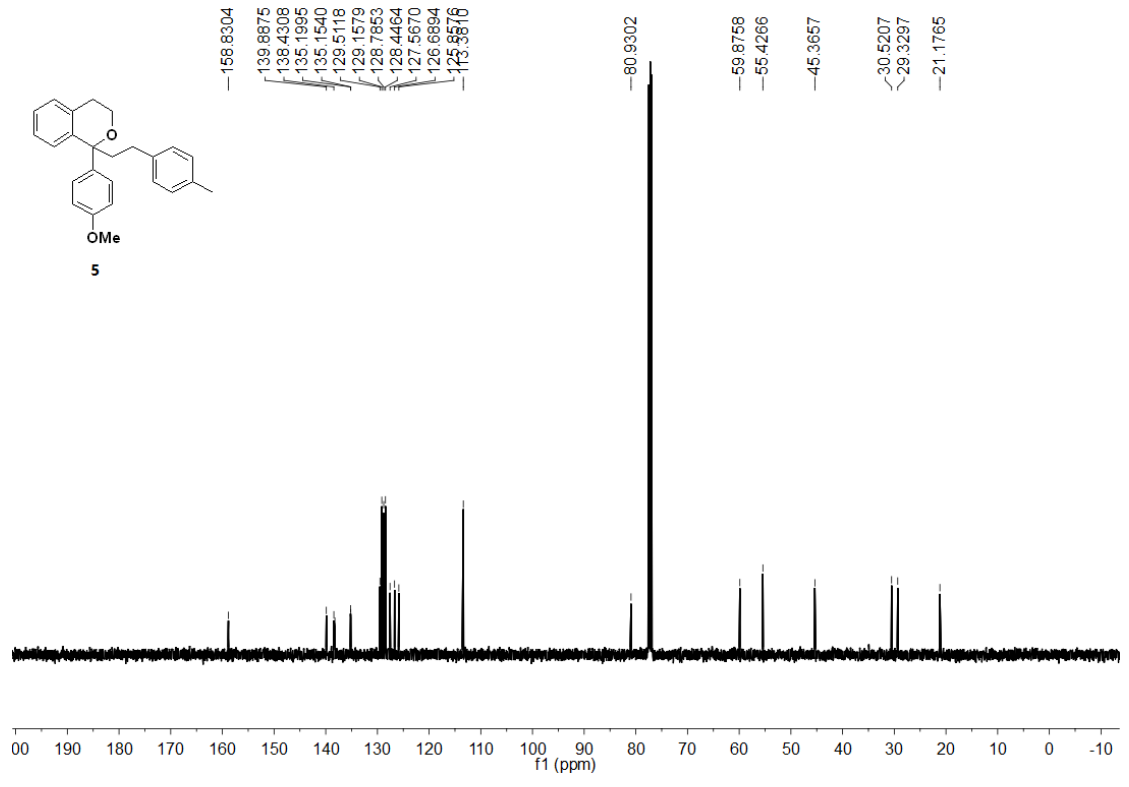

Supplement: c9qo00352e1.pdf [file c9qo00352e1.pdf]
